# Supplementary material for: Species-level identification of enterotype-specific microbial markers for colorectal cancer and adenoma
Source: Royal Society of Chemistry journal article supplement (doi:10.1039/d4mo00016a), 2024-05-09
Supplement: d4mo00016a1.xlsx [file d4mo00016a1.xlsx]

## Sheet: Summary
Table Name	Definition
Table S1	Metadata of fecal metagenomic samples used in the study.
Table S2	LEfSe results for differentially abundant genes with LDA score >2.
Table S3	LEfSe results for differentially abundant pathways with LDA score >2.
Table S4	Correlation analysis results between Enterotype-specific differential species and metadata groups.

## Sheet: Table S1
Study_ID	NAME	Age	Age_Group	Gender	BMI	Obesity	Country	AJCC_Stage	TNM_Stage	Localization	Grup	FOBT	Diabetic
PRJDB4176	SAMD00164954	21	young	F	17.898	Low	JAP	NA	NA	NA	CTR	NA	NA
PRJDB4176	SAMD00164965	27	young	M	24.968	Normal	JAP	NA	NA	NA	CTR	NA	NA
PRJDB4176	SAMD00115013	28	young	M	26.2976	Fat	JAP	III	NA	Rectum	CRC	NA	NA
PRJDB4176	SAMD00114761	30	young	M	25.6896	Fat	JAP	IV	NA	LC	CRC	NA	NA
PRJDB4176	SAMD00165021	30	young	M	non	non	JAP	NA	NA	NA	CTR	NA	NA
PRJDB4176	SAMD00164950	31	young	M	39.3283	Obese	JAP	NA	NA	NA	CTR	NA	NA
PRJDB4176	SAMD00114884	32	young	F	22.3478	Normal	JAP	III	NA	Rectum	CRC	NA	NA
PRJDB4176	SAMD00164873	32	young	M	18.7328	Normal	JAP	NA	NA	NA	CTR	NA	NA
PRJDB4176	SAMD00165027	33	young	F	22.2063	Normal	JAP	NA	NA	NA	CTR	NA	NA
PRJDB4176	SAMD00164875	34	young	M	21.8573	Normal	JAP	NA	NA	NA	CTR	NA	NA
PRJDB4176	SAMD00164966	34	young	M	21.9281	Normal	JAP	NA	NA	NA	CTR	NA	NA
PRJDB4176	SAMD00164952	35	young	F	22.1893	Normal	JAP	NA	NA	NA	CTR	NA	NA
PRJDB4176	SAMD00165032	35	young	M	24.2215	Normal	JAP	NA	NA	NA	CTR	NA	NA
PRJDB4176	SAMD00164825	37	young	M	25.0135	Fat	JAP	NA	NA	NA	CTR	NA	NA
PRJDB4176	SAMD00164876	37	young	M	25.3444	Fat	JAP	NA	NA	NA	CTR	NA	NA
PRJDB4176	SAMD00164947	37	young	M	19.2672	Normal	JAP	NA	NA	NA	CTR	NA	NA
PRJDB4176	SAMD00164969	37	young	M	22.1297	Normal	JAP	NA	NA	NA	CTR	NA	NA
PRJDB4176	SAMD00114767	38	young	M	24.3911	Normal	JAP	IV	NA	RC	CRC	NA	NA
PRJDB4176	SAMD00115037	38	young	F	18.132	Low	JAP	NA	NA	NA	CTR	NA	NA
PRJDB4176	SAMD00115049	38	young	M	19.9573	Normal	JAP	NA	NA	NA	CTR	NA	NA
PRJDB4176	SAMD00164899	38	young	M	22.4996	Normal	JAP	NA	NA	NA	CTR	NA	NA
PRJDB4176	SAMD00165033	38	young	F	17.8506	Low	JAP	NA	NA	NA	CTR	NA	NA
PRJDB4176	SAMD00114921	39	young	M	19.3792	Normal	JAP	II	NA	RC	CRC	NA	NA
PRJDB4176	SAMD00164994	40	middle-age	M	22.5981	Normal	JAP	III	NA	RC	CRC	NA	NA
PRJDB4176	SAMD00114929	40	middle-age	M	22.9819	Normal	JAP	NA	NA	NA	CTR	NA	NA
PRJDB4176	SAMD00115025	40	middle-age	M	25	Fat	JAP	NA	NA	NA	CTR	NA	NA
PRJDB4176	SAMD00115036	40	middle-age	F	20.0288	Normal	JAP	NA	NA	NA	CTR	NA	NA
PRJDB4176	SAMD00164886	40	middle-age	M	27.3797	Fat	JAP	NA	NA	NA	CTR	NA	NA
PRJDB4176	SAMD00164914	40	middle-age	F	17.6309	Low	JAP	NA	NA	NA	CTR	NA	NA
PRJDB4176	SAMD00164963	40	middle-age	M	22.7732	Normal	JAP	NA	NA	NA	CTR	NA	NA
PRJDB4176	SAMD00115024	41	middle-age	F	19.92	Normal	JAP	NA	NA	NA	Adenoma	NA	NA
PRJDB4176	SAMD00164900	41	middle-age	F	20.89	Normal	JAP	NA	NA	NA	Adenoma	NA	NA
PRJDB4176	SAMD00114850	41	middle-age	F	20.3244	Normal	JAP	NA	NA	NA	CTR	NA	NA
PRJDB4176	SAMD00115038	41	middle-age	F	22.3757	Normal	JAP	NA	NA	NA	CTR	NA	NA
PRJDB4176	SAMD00165004	41	middle-age	F	26.079	Fat	JAP	NA	NA	NA	CTR	NA	NA
PRJDB4176	SAMD00114796	42	middle-age	M	33.14	Obese	JAP	NA	NA	NA	CTR	NA	NA
PRJDB4176	SAMD00114880	42	middle-age	F	25.5937	Fat	JAP	NA	NA	NA	CTR	NA	NA
PRJDB4176	SAMD00114918	42	middle-age	M	26.1738	Fat	JAP	NA	NA	NA	CTR	NA	NA
PRJDB4176	SAMD00115041	42	middle-age	F	19.433	Normal	JAP	NA	NA	NA	CTR	NA	NA
PRJDB4176	SAMD00164713	42	middle-age	F	20.3125	Normal	JAP	NA	NA	NA	CTR	NA	NA
PRJDB4176	SAMD00164857	42	middle-age	F	17.9418	Low	JAP	NA	NA	NA	CTR	NA	NA
PRJDB4176	SAMD00164976	43	middle-age	M	21.6333	Normal	JAP	III	NA	Rectum	CRC	NA	NA
PRJDB4176	SAMD00164723	43	middle-age	F	21.7784	Normal	JAP	NA	NA	NA	CTR	NA	NA
PRJDB4176	SAMD00164835	43	middle-age	F	16.7969	Low	JAP	NA	NA	NA	CTR	NA	NA
PRJDB4176	SAMD00165025	43	middle-age	M	24.7409	Normal	JAP	NA	NA	NA	CTR	NA	NA
PRJDB4176	SAMD00164734	44	middle-age	M	22.13	Normal	JAP	NA	NA	NA	Adenoma	NA	NA
PRJDB4176	SAMD00114782	44	middle-age	F	26.6728	Fat	JAP	III	NA	RC	CRC	NA	NA
PRJDB4176	SAMD00115085	44	middle-age	F	26.6728	Fat	JAP	III	NA	RC	CRC	NA	NA
PRJDB4176	SAMD00164861	44	middle-age	M	28.9979	Fat	JAP	I	NA	LC	CRC	NA	NA
PRJDB4176	SAMD00114994	44	middle-age	M	22.0522	Normal	JAP	NA	NA	NA	CTR	NA	NA
PRJDB4176	SAMD00164727	44	middle-age	M	24.1633	Normal	JAP	NA	NA	NA	CTR	NA	NA
PRJDB4176	SAMD00164862	44	middle-age	M	23.8367	Normal	JAP	NA	NA	NA	CTR	NA	NA
PRJDB4176	SAMD00164895	44	middle-age	F	21.6311	Normal	JAP	NA	NA	NA	CTR	NA	NA
PRJDB4176	SAMD00114728	45	middle-age	M	20.6193	Normal	JAP	II	NA	Rectum	CRC	NA	NA
PRJDB4176	SAMD00114849	45	middle-age	F	23.4224	Normal	JAP	III	NA	Rectum	CRC	NA	NA
PRJDB4176	SAMD00115076	45	middle-age	M	20.6193	Normal	JAP	II	NA	Rectum	CRC	NA	NA
PRJDB4176	SAMD00165002	45	middle-age	M	22.2753	Normal	JAP	I	NA	Rectum	CRC	NA	NA
PRJDB4176	SAMD00114798	45	middle-age	M	22.2222	Normal	JAP	NA	NA	NA	CTR	NA	NA
PRJDB4176	SAMD00114865	45	middle-age	M	23.9512	Normal	JAP	NA	NA	NA	CTR	NA	NA
PRJDB4176	SAMD00115004	45	middle-age	F	19.2277	Normal	JAP	NA	NA	NA	CTR	NA	NA
PRJDB4176	SAMD00165013	45	middle-age	F	18.9036	Normal	JAP	NA	NA	NA	CTR	NA	NA
PRJDB4176	SAMD00114805	46	middle-age	M	19.1512	Normal	JAP	III	NA	Rectum	CRC	NA	NA
PRJDB4176	SAMD00114946	46	middle-age	F	17.4449	Low	JAP	III	NA	Rectum	CRC	NA	NA
PRJDB4176	SAMD00164821	46	middle-age	M	22.8571	Normal	JAP	I	NA	LC	CRC	NA	NA
PRJDB4176	SAMD00164864	46	middle-age	M	25.4028	Fat	JAP	0	NA	RC	CRC	NA	NA
PRJDB4176	SAMD00165019	46	middle-age	F	20.5457	Normal	JAP	II	NA	LC	CRC	NA	NA
PRJDB4176	SAMD00114942	46	middle-age	F	19.9594	Normal	JAP	NA	NA	NA	CTR	NA	NA
PRJDB4176	SAMD00164827	46	middle-age	M	22.4712	Normal	JAP	NA	NA	NA	CTR	NA	NA
PRJDB4176	SAMD00164828	46	middle-age	F	23.0469	Normal	JAP	NA	NA	NA	CTR	NA	NA
PRJDB4176	SAMD00164915	46	middle-age	F	20.3125	Normal	JAP	NA	NA	NA	CTR	NA	NA
PRJDB4176	SAMD00165029	46	middle-age	M	21.7994	Normal	JAP	NA	NA	NA	CTR	NA	NA
PRJDB4176	SAMD00164948	47	middle-age	F	30.76	Obese	JAP	NA	NA	NA	Adenoma	NA	NA
PRJDB4176	SAMD00114723	47	middle-age	M	23.5666	Normal	JAP	I	NA	Rectum	CRC	NA	NA
PRJDB4176	SAMD00114794	47	middle-age	M	21.4533	Normal	JAP	II	NA	Rectum	CRC	NA	NA
PRJDB4176	SAMD00114878	47	middle-age	M	35.201	Obese	JAP	I	NA	Rectum	CRC	NA	NA
PRJDB4176	SAMD00114943	47	middle-age	F	18.0662	Low	JAP	0	NA	Rectum	CRC	NA	NA
PRJDB4176	SAMD00115066	47	middle-age	M	23.5666	Normal	JAP	I	NA	Rectum	CRC	NA	NA
PRJDB4176	SAMD00114795	47	middle-age	M	20.679	Normal	JAP	NA	NA	NA	CTR	NA	NA
PRJDB4176	SAMD00114809	47	middle-age	F	22.3757	Normal	JAP	NA	NA	NA	CTR	NA	NA
PRJDB4176	SAMD00164888	47	middle-age	M	26.1752	Fat	JAP	NA	NA	NA	CTR	NA	NA
PRJDB4176	SAMD00164918	47	middle-age	M	21.4533	Normal	JAP	NA	NA	NA	CTR	NA	NA
PRJDB4176	SAMD00164920	47	middle-age	F	18.4425	Low	JAP	NA	NA	NA	CTR	NA	NA
PRJDB4176	SAMD00114962	48	middle-age	M	19.1	Normal	JAP	NA	NA	NA	Adenoma	NA	NA
PRJDB4176	SAMD00154993	48	middle-age	M	23.03	Normal	JAP	III	NA	Rectum	CRC	NA	NA
PRJDB4176	SAMD00164780	48	middle-age	F	22.8928	Normal	JAP	II	NA	Rectum	CRC	NA	NA
PRJDB4176	SAMD00164781	48	middle-age	F	22.8928	Normal	JAP	II	NA	Rectum	CRC	NA	NA
PRJDB4176	SAMD00164818	48	middle-age	M	28.306	Fat	JAP	0	NA	LC	CRC	NA	NA
PRJDB4176	SAMD00164850	48	middle-age	M	25.6489	Fat	JAP	I	NA	LC	CRC	NA	NA
PRJDB4176	SAMD00164975	48	middle-age	F	29.5159	Fat	JAP	III	NA	LC	CRC	NA	NA
PRJDB4176	SAMD00165012	48	middle-age	F	23.1911	Normal	JAP	III	NA	RC	CRC	NA	NA
PRJDB4176	SAMD00164856	48	middle-age	M	21.6721	Normal	JAP	NA	NA	NA	CTR	NA	NA
PRJDB4176	SAMD00114772	49	middle-age	M	26.1224	Fat	JAP	IV	NA	Rectum	CRC	NA	NA
PRJDB4176	SAMD00114775	49	middle-age	F	22.6409	Normal	JAP	III	NA	LC	CRC	NA	NA
PRJDB4176	SAMD00114892	49	middle-age	F	19.3821	Normal	JAP	III	NA	Rectum	CRC	NA	NA
PRJDB4176	SAMD00114917	49	middle-age	M	37.551	Obese	JAP	III	NA	RC	CRC	NA	NA
PRJDB4176	SAMD00115084	49	middle-age	F	22.6409	Normal	JAP	III	NA	LC	CRC	NA	NA
PRJDB4176	SAMD00164971	49	middle-age	F	19.2894	Normal	JAP	III	NA	RC	CRC	NA	NA
PRJDB4176	SAMD00114895	49	middle-age	F	22.3081	Normal	JAP	NA	NA	NA	CTR	NA	NA
PRJDB4176	SAMD00114950	49	middle-age	F	21.2306	Normal	JAP	NA	NA	NA	CTR	NA	NA
PRJDB4176	SAMD00114959	49	middle-age	M	27.3982	Fat	JAP	NA	NA	NA	CTR	NA	NA
PRJDB4176	SAMD00114979	49	middle-age	F	19.6311	Normal	JAP	NA	NA	NA	CTR	NA	NA
PRJDB4176	SAMD00115059	49	middle-age	M	22.694	Normal	JAP	NA	NA	NA	CTR	NA	NA
PRJDB4176	SAMD00164949	49	middle-age	F	19.7239	Normal	JAP	NA	NA	NA	CTR	NA	NA
PRJDB4176	SAMD00165020	49	middle-age	F	20.83	Normal	JAP	NA	NA	NA	CTR	NA	NA
PRJDB4176	SAMD00164717	50	middle-age	M	23.67	Normal	JAP	NA	NA	NA	Adenoma	NA	NA
PRJDB4176	SAMD00114835	50	middle-age	M	23.49	Normal	JAP	II	NA	Rectum	CRC	NA	NA
PRJDB4176	SAMD00114925	50	middle-age	M	22.0522	Normal	JAP	0	NA	Rectum	CRC	NA	NA
PRJDB4176	SAMD00164903	50	middle-age	M	23.6614	Normal	JAP	0	NA	LC	CRC	NA	NA
PRJDB4176	SAMD00114745	50	middle-age	M	24.8163	Normal	JAP	NA	NA	NA	CTR	NA	NA
PRJDB4176	SAMD00114783	50	middle-age	F	20.3428	Normal	JAP	NA	NA	NA	CTR	NA	NA
PRJDB4176	SAMD00115042	50	middle-age	F	27.993	Fat	JAP	NA	NA	NA	CTR	NA	NA
PRJDB4176	SAMD00164744	50	middle-age	F	20.0288	Normal	JAP	NA	NA	NA	CTR	NA	NA
PRJDB4176	SAMD00164956	50	middle-age	M	21.4619	Normal	JAP	NA	NA	NA	CTR	NA	NA
PRJDB4176	SAMD00114758	51	middle-age	M	21.8	Normal	JAP	NA	NA	NA	Adenoma	NA	NA
PRJDB4176	SAMD00114740	51	middle-age	F	18.8271	Normal	JAP	I	NA	LC	CRC	NA	NA
PRJDB4176	SAMD00114856	51	middle-age	M	18.1662	Low	JAP	II	NA	RC	CRC	NA	NA
PRJDB4176	SAMD00114868	51	middle-age	M	22.7244	Normal	JAP	II	NA	RC	CRC	NA	NA
PRJDB4176	SAMD00115035	51	middle-age	M	20.7612	Normal	JAP	III	NA	Rectum	CRC	NA	NA
PRJDB4176	SAMD00115067	51	middle-age	F	18.8271	Normal	JAP	I	NA	LC	CRC	NA	NA
PRJDB4176	SAMD00115089	51	middle-age	M	20.7612	Normal	JAP	III	NA	Rectum	CRC	NA	NA
PRJDB4176	SAMD00164907	51	middle-age	M	26.6436	Fat	JAP	I	NA	Rectum	CRC	NA	NA
PRJDB4176	SAMD00164978	51	middle-age	M	22.2291	Normal	JAP	I	NA	RC	CRC	NA	NA
PRJDB4176	SAMD00114837	51	middle-age	M	29.0437	Fat	JAP	NA	NA	NA	CTR	NA	NA
PRJDB4176	SAMD00114967	51	middle-age	M	28.3848	Fat	JAP	NA	NA	NA	CTR	NA	NA
PRJDB4176	SAMD00164808	51	middle-age	F	18.0802	Low	JAP	NA	NA	NA	CTR	NA	NA
PRJDB4176	SAMD00164878	51	middle-age	M	19.1571	Normal	JAP	NA	NA	NA	CTR	NA	NA
PRJDB4176	SAMD00164881	51	middle-age	F	19.433	Normal	JAP	NA	NA	NA	CTR	NA	NA
PRJDB4176	SAMD00164960	51	middle-age	F	21.9076	Normal	JAP	NA	NA	NA	CTR	NA	NA
PRJDB4176	SAMD00165010	51	middle-age	F	21.2306	Normal	JAP	NA	NA	NA	CTR	NA	NA
PRJDB4176	SAMD00114928	52	middle-age	M	21.05	Normal	JAP	NA	NA	NA	Adenoma	NA	NA
PRJDB4176	SAMD00114802	52	middle-age	M	22.57	Normal	JAP	NA	NA	NA	Adenoma	NA	NA
PRJDB4176	SAMD00164760	52	middle-age	M	22.58	Normal	JAP	NA	NA	NA	Adenoma	NA	NA
PRJDB4176	SAMD00114744	52	middle-age	M	31.0204	Obese	JAP	I	NA	Rectum	CRC	NA	NA
PRJDB4176	SAMD00114810	52	middle-age	M	23.255	Normal	JAP	IV	NA	Rectum	CRC	NA	NA
PRJDB4176	SAMD00114911	52	middle-age	M	23.6652	Normal	JAP	I	NA	Rectum	CRC	NA	NA
PRJDB4176	SAMD00114965	52	middle-age	M	26.4236	Fat	JAP	I	NA	Rectum	CRC	NA	NA
PRJDB4176	SAMD00115068	52	middle-age	M	31.0204	Obese	JAP	I	NA	Rectum	CRC	NA	NA
PRJDB4176	SAMD00114824	52	middle-age	M	21.3039	Normal	JAP	NA	NA	NA	CTR	NA	NA
PRJDB4176	SAMD00164837	52	middle-age	M	25.0135	Fat	JAP	NA	NA	NA	CTR	NA	NA
PRJDB4176	SAMD00164951	52	middle-age	F	22.5827	Normal	JAP	NA	NA	NA	CTR	NA	NA
PRJDB4176	SAMD00164958	52	middle-age	M	27.6361	Fat	JAP	NA	NA	NA	CTR	NA	NA
PRJDB4176	SAMD00164972	52	middle-age	F	17.9089	Low	JAP	NA	NA	NA	CTR	NA	NA
PRJDB4176	SAMD00164765	53	middle-age	M	23.38	Normal	JAP	NA	NA	NA	Adenoma	NA	NA
PRJDB4176	SAMD00114936	53	middle-age	M	27.99	Fat	JAP	NA	NA	NA	Adenoma	NA	NA
PRJDB4176	SAMD00114814	53	middle-age	M	20.7612	Normal	JAP	I	NA	Rectum	CRC	NA	NA
PRJDB4176	SAMD00114935	53	middle-age	M	26.3656	Fat	JAP	I	NA	Rectum	CRC	NA	NA
PRJDB4176	SAMD00115071	53	middle-age	M	20.7612	Normal	JAP	I	NA	Rectum	CRC	NA	NA
PRJDB4176	SAMD00164989	53	middle-age	M	31.2314	Obese	JAP	0	NA	LC and RC	CRC	NA	NA
PRJDB4176	SAMD00114843	53	middle-age	F	18.662	Normal	JAP	NA	NA	NA	CTR	NA	NA
PRJDB4176	SAMD00114999	54	middle-age	M	22.41	Normal	JAP	NA	NA	NA	Adenoma	NA	NA
PRJDB4176	SAMD00114915	54	middle-age	F	20.5688	Normal	JAP	III	NA	LC	CRC	NA	NA
PRJDB4176	SAMD00114972	54	middle-age	F	24.7475	Normal	JAP	0	NA	Rectum	CRC	NA	NA
PRJDB4176	SAMD00164885	54	middle-age	M	25.4694	Fat	JAP	0	NA	LC	CRC	NA	NA
PRJDB4176	SAMD00114838	54	middle-age	M	23.7118	Normal	JAP	NA	NA	NA	CTR	NA	NA
PRJDB4176	SAMD00114899	54	middle-age	F	22.1893	Normal	JAP	NA	NA	NA	CTR	NA	NA
PRJDB4176	SAMD00114900	54	middle-age	F	19.6283	Normal	JAP	NA	NA	NA	CTR	NA	NA
PRJDB4176	SAMD00164823	54	middle-age	F	20.7756	Normal	JAP	NA	NA	NA	CTR	NA	NA
PRJDB4176	SAMD00164891	54	middle-age	M	23.5294	Normal	JAP	NA	NA	NA	CTR	NA	NA
PRJDB4176	SAMD00164901	54	middle-age	F	20.2395	Normal	JAP	NA	NA	NA	CTR	NA	NA
PRJDB4176	SAMD00164929	54	middle-age	M	27.3356	Fat	JAP	NA	NA	NA	CTR	NA	NA
PRJDB4176	SAMD00164804	55	middle-age	M	25.25	Fat	JAP	NA	NA	NA	Adenoma	NA	NA
PRJDB4176	SAMD00114934	55	middle-age	M	26.1752	Fat	JAP	II	NA	Rectum	CRC	NA	NA
PRJDB4176	SAMD00115000	55	middle-age	M	24.5779	Normal	JAP	III	NA	Rectum	CRC	NA	NA
PRJDB4176	SAMD00115088	55	middle-age	M	24.5779	Normal	JAP	III	NA	Rectum	CRC	NA	NA
PRJDB4176	SAMD00164832	55	middle-age	M	25.3515	Fat	JAP	I	NA	Rectum	CRC	NA	NA
PRJDB4176	SAMD00165011	55	middle-age	M	22.5981	Normal	JAP	I	NA	RC	CRC	NA	NA
PRJDB4176	SAMD00114736	55	middle-age	F	23.5556	Normal	JAP	NA	NA	NA	CTR	NA	NA
PRJDB4176	SAMD00114845	55	middle-age	M	26.8122	Fat	JAP	NA	NA	NA	CTR	NA	NA
PRJDB4176	SAMD00115043	55	middle-age	M	19.3772	Normal	JAP	NA	NA	NA	CTR	NA	NA
PRJDB4176	SAMD00115045	55	middle-age	F	18.8271	Normal	JAP	NA	NA	NA	CTR	NA	NA
PRJDB4176	SAMD00164814	55	middle-age	M	24.093	Normal	JAP	NA	NA	NA	CTR	NA	NA
PRJDB4176	SAMD00164872	55	middle-age	M	23.3887	Normal	JAP	NA	NA	NA	CTR	NA	NA
PRJDB4176	SAMD00164896	55	middle-age	M	24.5089	Normal	JAP	NA	NA	NA	CTR	NA	NA
PRJDB4176	SAMD00164897	55	middle-age	M	21.2585	Normal	JAP	NA	NA	NA	CTR	NA	NA
PRJDB4176	SAMD00164904	55	middle-age	M	22.913	Normal	JAP	NA	NA	NA	CTR	NA	NA
PRJDB4176	SAMD00164936	55	middle-age	M	23.5666	Normal	JAP	NA	NA	NA	CTR	NA	NA
PRJDB4176	SAMD00164973	55	middle-age	F	21.0828	Normal	JAP	NA	NA	NA	CTR	NA	NA
PRJDB4176	SAMD00165026	55	middle-age	F	19.7777	Normal	JAP	NA	NA	NA	CTR	NA	NA
PRJDB4176	SAMD00114909	56	middle-age	F	23.0112	Normal	JAP	I	NA	Rectum	CRC	NA	NA
PRJDB4176	SAMD00114969	56	middle-age	F	17.4818	Low	JAP	0	NA	LC	CRC	NA	NA
PRJDB4176	SAMD00115064	56	middle-age	M	22.2041	Normal	JAP	NA	NA	NA	CTR	NA	NA
PRJDB4176	SAMD00136648	56	middle-age	M	26.8544	Fat	JAP	NA	NA	NA	CTR	NA	NA
PRJDB4176	SAMD00164926	56	middle-age	M	23.8367	Normal	JAP	NA	NA	NA	CTR	NA	NA
PRJDB4176	SAMD00165022	56	middle-age	M	24.093	Normal	JAP	NA	NA	NA	CTR	NA	NA
PRJDB4176	SAMD00164925	57	middle-age	F	19.37	Normal	JAP	NA	NA	NA	Adenoma	NA	NA
PRJDB4176	SAMD00114765	57	middle-age	F	18.369	Low	JAP	III	NA	RC	CRC	NA	NA
PRJDB4176	SAMD00114788	57	middle-age	M	25.4327	Fat	JAP	0	NA	RC	CRC	NA	NA
PRJDB4176	SAMD00115007	57	middle-age	F	24.4561	Normal	JAP	I	NA	LC	CRC	NA	NA
PRJDB4176	SAMD00115014	57	middle-age	M	26.881	Fat	JAP	I	NA	LC	CRC	NA	NA
PRJDB4176	SAMD00164997	57	middle-age	M	27.0169	Fat	JAP	0	NA	Rectum	CRC	NA	NA
PRJDB4176	SAMD00114873	57	middle-age	M	23.2438	Normal	JAP	NA	NA	NA	CTR	NA	NA
PRJDB4176	SAMD00115053	57	middle-age	M	21.048	Normal	JAP	NA	NA	NA	CTR	NA	NA
PRJDB4176	SAMD00115054	57	middle-age	F	23.1247	Normal	JAP	NA	NA	NA	CTR	NA	NA
PRJDB4176	SAMD00164890	57	middle-age	M	26.2596	Fat	JAP	NA	NA	NA	CTR	NA	NA
PRJDB4176	SAMD00164953	57	middle-age	M	30.1162	Obese	JAP	NA	NA	NA	CTR	NA	NA
PRJDB4176	SAMD00164957	57	middle-age	F	21.4844	Normal	JAP	NA	NA	NA	CTR	NA	NA
PRJDB4176	SAMD00114756	58	middle-age	M	21.95	Normal	JAP	NA	NA	NA	Adenoma	NA	NA
PRJDB4176	SAMD00114937	58	middle-age	M	21.97	Normal	JAP	NA	NA	NA	Adenoma	NA	NA
PRJDB4176	SAMD00164813	58	middle-age	M	22.86	Normal	JAP	NA	NA	NA	Adenoma	NA	NA
PRJDB4176	SAMD00114851	58	middle-age	M	23.88	Normal	JAP	NA	NA	NA	Adenoma	NA	NA
PRJDB4176	SAMD00164772	58	middle-age	M	25.4	Fat	JAP	NA	NA	NA	Adenoma	NA	NA
PRJDB4176	SAMD00114981	58	middle-age	F	34.81	Obese	JAP	NA	NA	NA	Adenoma	NA	NA
PRJDB4176	SAMD00114907	58	middle-age	M	19.6052	Normal	JAP	IV	NA	Rectum	CRC	NA	NA
PRJDB4176	SAMD00164695	58	middle-age	M	24.0238	Normal	JAP	I	NA	RC	CRC	NA	NA
PRJDB4176	SAMD00164696	58	middle-age	M	24.0238	Normal	JAP	I	NA	RC	CRC	NA	NA
PRJDB4176	SAMD00164745	58	middle-age	M	28.0557	Fat	JAP	III	NA	Rectum	CRC	NA	NA
PRJDB4176	SAMD00164769	58	middle-age	M	22.5306	Normal	JAP	0	NA	RC	CRC	NA	NA
PRJDB4176	SAMD00164841	58	middle-age	M	23.1206	Normal	JAP	0	NA	LC	CRC	NA	NA
PRJDB4176	SAMD00164847	58	middle-age	F	17.1875	Low	JAP	I	NA	LC	CRC	NA	NA
PRJDB4176	SAMD00164940	58	middle-age	M	20.5151	Normal	JAP	0	NA	Rectum	CRC	NA	NA
PRJDB4176	SAMD00164995	58	middle-age	F	22.5069	Normal	JAP	III	NA	Rectum	CRC	NA	NA
PRJDB4176	SAMD00114789	58	middle-age	F	22.5466	Normal	JAP	NA	NA	NA	CTR	NA	NA
PRJDB4176	SAMD00164833	58	middle-age	M	20.3037	Normal	JAP	NA	NA	NA	CTR	NA	NA
PRJDB4176	SAMD00164840	58	middle-age	F	18.5529	Normal	JAP	NA	NA	NA	CTR	NA	NA
PRJDB4176	SAMD00164908	58	middle-age	F	17.9089	Low	JAP	NA	NA	NA	CTR	NA	NA
PRJDB4176	SAMD00164996	58	middle-age	M	22.2291	Normal	JAP	NA	NA	NA	CTR	NA	NA
PRJDB4176	SAMD00114993	59	middle-age	F	20.06	Normal	JAP	NA	NA	NA	Adenoma	NA	NA
PRJDB4176	SAMD00114887	59	middle-age	M	22.4	Normal	JAP	NA	NA	NA	Adenoma	NA	NA
PRJDB4176	SAMD00114861	59	middle-age	M	24.39	Normal	JAP	NA	NA	NA	Adenoma	NA	NA
PRJDB4176	SAMD00114755	59	middle-age	M	25.4581	Fat	JAP	III	NA	Rectum and LC	CRC	NA	NA
PRJDB4176	SAMD00114817	59	middle-age	M	24.841	Normal	JAP	IV	NA	RC	CRC	NA	NA
PRJDB4176	SAMD00114863	59	middle-age	F	22.6562	Normal	JAP	IV	NA	LC	CRC	NA	NA
PRJDB4176	SAMD00114920	59	middle-age	F	20.9566	Normal	JAP	IV	NA	LC	CRC	NA	NA
PRJDB4176	SAMD00114956	59	middle-age	F	20.5049	Normal	JAP	III	NA	LC	CRC	NA	NA
PRJDB4176	SAMD00114957	59	middle-age	M	25.0593	Fat	JAP	III	NA	Rectum	CRC	NA	NA
PRJDB4176	SAMD00164817	59	middle-age	M	24.5089	Normal	JAP	0	NA	RC	CRC	NA	NA
PRJDB4176	SAMD00164910	59	middle-age	F	19.1467	Normal	JAP	0	NA	LC	CRC	NA	NA
PRJDB4176	SAMD00164991	59	middle-age	M	28.0664	Fat	JAP	I	NA	Rectum	CRC	NA	NA
PRJDB4176	SAMD00165003	59	middle-age	M	20.1995	Normal	JAP	III	NA	Rectum	CRC	NA	NA
PRJDB4176	SAMD00165014	59	middle-age	M	25.9516	Fat	JAP	III	NA	LC and Rectum	CRC	NA	NA
PRJDB4176	SAMD00114778	59	middle-age	F	20.0288	Normal	JAP	NA	NA	NA	CTR	NA	NA
PRJDB4176	SAMD00114833	59	middle-age	F	22.2222	Normal	JAP	NA	NA	NA	CTR	NA	NA
PRJDB4176	SAMD00115018	59	middle-age	M	28.8415	Fat	JAP	NA	NA	NA	CTR	NA	NA
PRJDB4176	SAMD00165030	59	middle-age	M	26.5338	Fat	JAP	NA	NA	NA	CTR	NA	NA
PRJDB4176	SAMD00114930	60	old	M	25.95	Fat	JAP	NA	NA	NA	Adenoma	NA	NA
PRJDB4176	SAMD00114725	60	old	M	28.41	Fat	JAP	NA	NA	NA	Adenoma	NA	NA
PRJDB4176	SAMD00114754	60	old	F	20.83	Normal	JAP	II	NA	RC	CRC	NA	NA
PRJDB4176	SAMD00114768	60	old	M	27.0641	Fat	JAP	0	NA	RC	CRC	NA	NA
PRJDB4176	SAMD00114841	60	old	M	23.2254	Normal	JAP	III	NA	LC	CRC	NA	NA
PRJDB4176	SAMD00114949	60	old	M	23.4236	Normal	JAP	III	NA	RC	CRC	NA	NA
PRJDB4176	SAMD00114952	60	old	M	21.2953	Normal	JAP	I	NA	Rectum	CRC	NA	NA
PRJDB4176	SAMD00115078	60	old	F	20.83	Normal	JAP	II	NA	RC	CRC	NA	NA
PRJDB4176	SAMD00115087	60	old	M	23.2254	Normal	JAP	III	NA	LC	CRC	NA	NA
PRJDB4176	SAMD00164836	60	old	F	20.0288	Normal	JAP	0	NA	RC	CRC	NA	NA
PRJDB4176	SAMD00164977	60	old	M	19.1953	Normal	JAP	III	NA	Rectum	CRC	NA	NA
PRJDB4176	SAMD00114719	60	old	M	22.2291	Normal	JAP	NA	NA	NA	CTR	NA	NA
PRJDB4176	SAMD00114784	60	old	F	21.1109	Normal	JAP	NA	NA	NA	CTR	NA	NA
PRJDB4176	SAMD00114889	60	old	M	20.8086	Normal	JAP	NA	NA	NA	CTR	NA	NA
PRJDB4176	SAMD00164809	60	old	M	19.487	Normal	JAP	NA	NA	NA	CTR	NA	NA
PRJDB4176	SAMD00165015	60	old	F	18.5901	Normal	JAP	NA	NA	NA	CTR	NA	NA
PRJDB4176	SAMD00114727	61	old	M	28.2933	Fat	JAP	IV	NA	LC and RC	CRC	NA	NA
PRJDB4176	SAMD00114786	61	old	F	24.6094	Normal	JAP	0	NA	RC	CRC	NA	NA
PRJDB4176	SAMD00114806	61	old	F	21.6413	Normal	JAP	I	NA	Rectum	CRC	NA	NA
PRJDB4176	SAMD00114958	61	old	F	23.6128	Normal	JAP	I	NA	Rectum	CRC	NA	NA
PRJDB4176	SAMD00115028	61	old	M	22.2291	Normal	JAP	I	NA	LC	CRC	NA	NA
PRJDB4176	SAMD00115070	61	old	F	21.6413	Normal	JAP	I	NA	Rectum	CRC	NA	NA
PRJDB4176	SAMD00164767	61	old	M	22.3954	Normal	JAP	0	NA	LC	CRC	NA	NA
PRJDB4176	SAMD00164826	61	old	M	27.4756	Fat	JAP	0	NA	LC	CRC	NA	NA
PRJDB4176	SAMD00164843	61	old	F	22.4766	Normal	JAP	0	NA	LC and RC	CRC	NA	NA
PRJDB4176	SAMD00164863	61	old	M	22.5896	Normal	JAP	0	NA	RC	CRC	NA	NA
PRJDB4176	SAMD00164912	61	old	F	17.8465	Low	JAP	0	NA	Rectum	CRC	NA	NA
PRJDB4176	SAMD00164998	61	old	M	27.102	Fat	JAP	III	NA	Rectum	CRC	NA	NA
PRJDB4176	SAMD00114757	61	old	M	26.2336	Fat	JAP	NA	NA	NA	CTR	NA	NA
PRJDB4176	SAMD00114860	61	old	M	25.9516	Fat	JAP	NA	NA	NA	CTR	NA	NA
PRJDB4176	SAMD00114867	61	old	F	27.0051	Fat	JAP	NA	NA	NA	CTR	NA	NA
PRJDB4176	SAMD00114898	61	old	F	18.591	Normal	JAP	NA	NA	NA	CTR	NA	NA
PRJDB4176	SAMD00164708	61	old	F	24.974	Normal	JAP	NA	NA	NA	CTR	NA	NA
PRJDB4176	SAMD00164853	61	old	F	21.0772	Normal	JAP	NA	NA	NA	CTR	NA	NA
PRJDB4176	SAMD00164902	61	old	M	26.4236	Fat	JAP	NA	NA	NA	CTR	NA	NA
PRJDB4176	SAMD00164961	61	old	F	17.0874	Low	JAP	NA	NA	NA	CTR	NA	NA
PRJDB4176	SAMD00164922	62	old	M	24.97	Normal	JAP	NA	NA	NA	Adenoma	NA	NA
PRJDB4176	SAMD00114737	62	old	F	21.0828	Normal	JAP	III	NA	LC	CRC	NA	NA
PRJDB4176	SAMD00114793	62	old	M	23.9512	Normal	JAP	II	NA	Rectum	CRC	NA	NA
PRJDB4176	SAMD00114803	62	old	M	24.6181	Normal	JAP	IV	NA	RC	CRC	NA	NA
PRJDB4176	SAMD00114954	62	old	M	25.5937	Fat	JAP	IV	NA	Rectum	CRC	NA	NA
PRJDB4176	SAMD00114960	62	old	F	22.0317	Normal	JAP	0	NA	RC	CRC	NA	NA
PRJDB4176	SAMD00115034	62	old	F	21.875	Normal	JAP	I	NA	LC	CRC	NA	NA
PRJDB4176	SAMD00115073	62	old	F	21.875	Normal	JAP	I	NA	LC	CRC	NA	NA
PRJDB4176	SAMD00115083	62	old	F	21.0828	Normal	JAP	III	NA	LC	CRC	NA	NA
PRJDB4176	SAMD00164812	62	old	F	29.2969	Fat	JAP	II	NA	RC	CRC	NA	NA
PRJDB4176	SAMD00164867	62	old	M	19.8347	Normal	JAP	I	NA	LC	CRC	NA	NA
PRJDB4176	SAMD00164871	62	old	M	21.0938	Normal	JAP	I	NA	LC	CRC	NA	NA
PRJDB4176	SAMD00114791	62	old	F	19.9219	Normal	JAP	NA	NA	NA	CTR	NA	NA
PRJDB4176	SAMD00114872	62	old	F	18.1955	Low	JAP	NA	NA	NA	CTR	NA	NA
PRJDB4176	SAMD00114984	62	old	F	22.6409	Normal	JAP	NA	NA	NA	CTR	NA	NA
PRJDB4176	SAMD00114992	62	old	F	19.052	Normal	JAP	NA	NA	NA	CTR	NA	NA
PRJDB4176	SAMD00115058	62	old	F	21.1702	Normal	JAP	NA	NA	NA	CTR	NA	NA
PRJDB4176	SAMD00164774	62	old	F	25.1532	Fat	JAP	NA	NA	NA	CTR	NA	NA
PRJDB4176	SAMD00164917	62	old	F	21.9261	Normal	JAP	NA	NA	NA	CTR	NA	NA
PRJDB4176	SAMD00164934	62	old	F	20.2395	Normal	JAP	NA	NA	NA	CTR	NA	NA
PRJDB4176	SAMD00165008	62	old	M	21.7079	Normal	JAP	NA	NA	NA	CTR	NA	NA
PRJDB4176	SAMD00114955	63	old	M	20.15	Normal	JAP	NA	NA	NA	Adenoma	NA	NA
PRJDB4176	SAMD00164942	63	old	F	21.23	Normal	JAP	NA	NA	NA	Adenoma	NA	NA
PRJDB4176	SAMD00114923	63	old	M	23.6	Normal	JAP	NA	NA	NA	Adenoma	NA	NA
PRJDB4176	SAMD00114729	63	old	F	21.3675	Normal	JAP	0	NA	Rectum	CRC	NA	NA
PRJDB4176	SAMD00114746	63	old	F	36.523	Obese	JAP	0	NA	Rectum	CRC	NA	NA
PRJDB4176	SAMD00114797	63	old	F	20.1348	Normal	JAP	III	NA	RC	CRC	NA	NA
PRJDB4176	SAMD00114822	63	old	M	24.8591	Normal	JAP	IV	NA	Rectum	CRC	NA	NA
PRJDB4176	SAMD00114826	63	old	F	17.4818	Low	JAP	IV	NA	Rectum	CRC	NA	NA
PRJDB4176	SAMD00114916	63	old	F	19.8178	Normal	JAP	I	NA	RC	CRC	NA	NA
PRJDB4176	SAMD00114919	63	old	M	19.7531	Normal	JAP	I	NA	RC	CRC	NA	NA
PRJDB4176	SAMD00115086	63	old	F	20.1348	Normal	JAP	III	NA	RC	CRC	NA	NA
PRJDB4176	SAMD00164859	63	old	M	23.5078	Normal	JAP	I	NA	LC	CRC	NA	NA
PRJDB4176	SAMD00164985	63	old	F	23.5556	Normal	JAP	II	NA	LC	CRC	NA	NA
PRJDB4176	SAMD00114888	63	old	M	20.898	Normal	JAP	NA	NA	NA	CTR	NA	NA
PRJDB4176	SAMD00114953	63	old	M	22.0581	Normal	JAP	NA	NA	NA	CTR	NA	NA
PRJDB4176	SAMD00164870	63	old	F	27.5482	Fat	JAP	NA	NA	NA	CTR	NA	NA
PRJDB4176	SAMD00164879	63	old	M	21.1073	Normal	JAP	NA	NA	NA	CTR	NA	NA
PRJDB4176	SAMD00164892	63	old	M	24.4418	Normal	JAP	NA	NA	NA	CTR	NA	NA
PRJDB4176	SAMD00164930	63	old	F	19.1467	Normal	JAP	NA	NA	NA	CTR	NA	NA
PRJDB4176	SAMD00164962	63	old	F	17.898	Low	JAP	NA	NA	NA	CTR	NA	NA
PRJDB4176	SAMD00164750	64	old	M	18.78	Normal	JAP	NA	NA	NA	Adenoma	NA	NA
PRJDB4176	SAMD00164943	64	old	F	19.82	Normal	JAP	NA	NA	NA	Adenoma	NA	NA
PRJDB4176	SAMD00114985	64	old	M	21.8	Normal	JAP	NA	NA	NA	Adenoma	NA	NA
PRJDB4176	SAMD00114866	64	old	M	22.41	Normal	JAP	NA	NA	NA	Adenoma	NA	NA
PRJDB4176	SAMD00164746	64	old	M	24.16	Normal	JAP	NA	NA	NA	Adenoma	NA	NA
PRJDB4176	SAMD00114980	64	old	F	31.11	Obese	JAP	NA	NA	NA	Adenoma	NA	NA
PRJDB4176	SAMD00114722	64	old	M	22.46	Normal	JAP	III	NA	Rectum	CRC	NA	NA
PRJDB4176	SAMD00114748	64	old	F	22.4766	Normal	JAP	0	NA	RC	CRC	NA	NA
PRJDB4176	SAMD00114766	64	old	M	23.0518	Normal	JAP	I	NA	Rectum	CRC	NA	NA
PRJDB4176	SAMD00114871	64	old	M	23.1084	Normal	JAP	III	NA	Rectum	CRC	NA	NA
PRJDB4176	SAMD00114883	64	old	M	23.8367	Normal	JAP	I	NA	Rectum	CRC	NA	NA
PRJDB4176	SAMD00114933	64	old	M	20.4467	Normal	JAP	III	NA	Rectum	CRC	NA	NA
PRJDB4176	SAMD00114939	64	old	M	22.68	Normal	JAP	I	NA	Rectum	CRC	NA	NA
PRJDB4176	SAMD00115029	64	old	F	24.2188	Normal	JAP	I	NA	RC	CRC	NA	NA
PRJDB4176	SAMD00115069	64	old	M	23.0518	Normal	JAP	I	NA	Rectum	CRC	NA	NA
PRJDB4176	SAMD00115072	64	old	F	24.2188	Normal	JAP	I	NA	RC	CRC	NA	NA
PRJDB4176	SAMD00164721	64	old	F	18.026	Low	JAP	I	NA	Rectum	CRC	NA	NA
PRJDB4176	SAMD00164889	64	old	M	22.4059	Normal	JAP	0	NA	LC	CRC	NA	NA
PRJDB4176	SAMD00164937	64	old	M	24.4898	Normal	JAP	I	NA	LC	CRC	NA	NA
PRJDB4176	SAMD00164944	64	old	M	22.5896	Normal	JAP	0	NA	RC	CRC	NA	NA
PRJDB4176	SAMD00164982	64	old	F	25.333	Fat	JAP	III	NA	Rectum	CRC	NA	NA
PRJDB4176	SAMD00164984	64	old	F	29.6766	Fat	JAP	0	NA	RC	CRC	NA	NA
PRJDB4176	SAMD00164990	64	old	M	26.2596	Fat	JAP	III	NA	LC	CRC	NA	NA
PRJDB4176	SAMD00114781	64	old	M	20.5191	Normal	JAP	NA	NA	NA	CTR	NA	NA
PRJDB4176	SAMD00114968	64	old	F	21.1553	Normal	JAP	NA	NA	NA	CTR	NA	NA
PRJDB4176	SAMD00114982	64	old	F	23.1911	Normal	JAP	NA	NA	NA	CTR	NA	NA
PRJDB4176	SAMD00115046	64	old	F	24.7768	Normal	JAP	NA	NA	NA	CTR	NA	NA
PRJDB4176	SAMD00115056	64	old	F	17.5431	Low	JAP	NA	NA	NA	CTR	NA	NA
PRJDB4176	SAMD00164911	64	old	F	16.4237	Low	JAP	NA	NA	NA	CTR	NA	NA
PRJDB4176	SAMD00165024	64	old	F	21.0938	Normal	JAP	NA	NA	NA	CTR	NA	NA
PRJDB4176	SAMD00164921	65	old	M	19.72	Normal	JAP	NA	NA	NA	Adenoma	NA	NA
PRJDB4176	SAMD00164757	65	old	F	20.43	Normal	JAP	NA	NA	NA	Adenoma	NA	NA
PRJDB4176	SAMD00114864	65	old	M	24.86	Normal	JAP	NA	NA	NA	Adenoma	NA	NA
PRJDB4176	SAMD00114753	65	old	M	21.3039	Normal	JAP	IV	NA	RC	CRC	NA	NA
PRJDB4176	SAMD00114764	65	old	M	21.7181	Normal	JAP	II	NA	RC	CRC	NA	NA
PRJDB4176	SAMD00114839	65	old	M	25.0593	Fat	JAP	I	NA	Rectum	CRC	NA	NA
PRJDB4176	SAMD00114857	65	old	F	17.9931	Low	JAP	II	NA	Rectum	CRC	NA	NA
PRJDB4176	SAMD00114886	65	old	M	27.1809	Fat	JAP	0	NA	LC	CRC	NA	NA
PRJDB4176	SAMD00114914	65	old	F	24.9199	Normal	JAP	0	NA	RC	CRC	NA	NA
PRJDB4176	SAMD00115030	65	old	M	21.83	Normal	JAP	0	NA	RC	CRC	NA	NA
PRJDB4176	SAMD00115079	65	old	M	21.7181	Normal	JAP	II	NA	RC	CRC	NA	NA
PRJDB4176	SAMD00115081	65	old	F	17.9931	Low	JAP	II	NA	Rectum	CRC	NA	NA
PRJDB4176	SAMD00154994	65	old	M	21.3839	Normal	JAP	III	NA	RC	CRC	NA	NA
PRJDB4176	SAMD00164779	65	old	M	20.2449	Normal	JAP	0	NA	Rectum	CRC	NA	NA
PRJDB4176	SAMD00164838	65	old	F	18.2615	Low	JAP	0	NA	RC	CRC	NA	NA
PRJDB4176	SAMD00164839	65	old	M	20.0155	Normal	JAP	0	NA	Rectum	CRC	NA	NA
PRJDB4176	SAMD00164852	65	old	F	20.3125	Normal	JAP	0	NA	RC	CRC	NA	NA
PRJDB4176	SAMD00114747	65	old	M	24.281	Normal	JAP	NA	NA	NA	CTR	NA	NA
PRJDB4176	SAMD00114829	65	old	F	19.8189	Normal	JAP	NA	NA	NA	CTR	NA	NA
PRJDB4176	SAMD00114963	65	old	F	24.3232	Normal	JAP	NA	NA	NA	CTR	NA	NA
PRJDB4176	SAMD00114973	65	old	M	25.3934	Fat	JAP	NA	NA	NA	CTR	NA	NA
PRJDB4176	SAMD00115015	65	old	M	26.5625	Fat	JAP	NA	NA	NA	CTR	NA	NA
PRJDB4176	SAMD00115019	65	old	M	23.6652	Normal	JAP	NA	NA	NA	CTR	NA	NA
PRJDB4176	SAMD00115057	65	old	F	22.2137	Normal	JAP	NA	NA	NA	CTR	NA	NA
PRJDB4176	SAMD00154991	65	old	M	21.5645	Normal	JAP	NA	NA	NA	CTR	NA	NA
PRJDB4176	SAMD00164906	65	old	F	27.0993	Fat	JAP	NA	NA	NA	CTR	NA	NA
PRJDB4176	SAMD00165031	65	old	F	18.2563	Low	JAP	NA	NA	NA	CTR	NA	NA
PRJDB4176	SAMD00114820	66	old	M	18.38	Low	JAP	NA	NA	NA	Adenoma	NA	NA
PRJDB4176	SAMD00114961	66	old	F	20.24	Normal	JAP	NA	NA	NA	Adenoma	NA	NA
PRJDB4176	SAMD00114724	66	old	F	22.6003	Normal	JAP	IV	NA	RC	CRC	NA	NA
PRJDB4176	SAMD00114726	66	old	M	22.0581	Normal	JAP	II	NA	Rectum	CRC	NA	NA
PRJDB4176	SAMD00114733	66	old	M	24.6755	Normal	JAP	I	NA	LC	CRC	NA	NA
PRJDB4176	SAMD00114846	66	old	F	20.4294	Normal	JAP	0	NA	Rectum	CRC	NA	NA
PRJDB4176	SAMD00114879	66	old	M	18.7109	Normal	JAP	I	NA	LC	CRC	NA	NA
PRJDB4176	SAMD00164776	66	old	M	20.5457	Normal	JAP	II	NA	Rectum	CRC	NA	NA
PRJDB4176	SAMD00164777	66	old	M	20.5457	Normal	JAP	II	NA	Rectum	CRC	NA	NA
PRJDB4176	SAMD00164830	66	old	M	22.1367	Normal	JAP	0	NA	RC	CRC	NA	NA
PRJDB4176	SAMD00164834	66	old	M	22.1453	Normal	JAP	0	NA	RC	CRC	NA	NA
PRJDB4176	SAMD00164846	66	old	M	23.8751	Normal	JAP	0	NA	RC	CRC	NA	NA
PRJDB4176	SAMD00164868	66	old	F	21.2306	Normal	JAP	I	NA	Rectum	CRC	NA	NA
PRJDB4176	SAMD00164883	66	old	F	22.0604	Normal	JAP	0	NA	RC	CRC	NA	NA
PRJDB4176	SAMD00164905	66	old	M	28.9341	Fat	JAP	0	NA	LC	CRC	NA	NA
PRJDB4176	SAMD00114720	66	old	M	24.6097	Normal	JAP	NA	NA	NA	CTR	NA	NA
PRJDB4176	SAMD00114869	66	old	F	31.6242	Obese	JAP	NA	NA	NA	CTR	NA	NA
PRJDB4176	SAMD00114970	66	old	F	25.4109	Fat	JAP	NA	NA	NA	CTR	NA	NA
PRJDB4176	SAMD00114977	66	old	M	23.6652	Normal	JAP	NA	NA	NA	CTR	NA	NA
PRJDB4176	SAMD00114995	66	old	F	19.5556	Normal	JAP	NA	NA	NA	CTR	NA	NA
PRJDB4176	SAMD00115005	66	old	M	23.4375	Normal	JAP	NA	NA	NA	CTR	NA	NA
PRJDB4176	SAMD00115016	66	old	F	19.0677	Normal	JAP	NA	NA	NA	CTR	NA	NA
PRJDB4176	SAMD00115017	66	old	F	21.6413	Normal	JAP	NA	NA	NA	CTR	NA	NA
PRJDB4176	SAMD00154992	66	old	F	22.3478	Normal	JAP	NA	NA	NA	CTR	NA	NA
PRJDB4176	SAMD00164848	66	old	M	24.8016	Normal	JAP	NA	NA	NA	CTR	NA	NA
PRJDB4176	SAMD00164933	66	old	F	23.03	Normal	JAP	NA	NA	NA	CTR	NA	NA
PRJDB4176	SAMD00164935	66	old	F	23.7253	Normal	JAP	NA	NA	NA	CTR	NA	NA
PRJDB4176	SAMD00114735	67	old	F	22.06	Normal	JAP	NA	NA	NA	Adenoma	NA	NA
PRJDB4176	SAMD00114787	67	old	M	23.15	Normal	JAP	NA	NA	NA	Adenoma	NA	NA
PRJDB4176	SAMD00164959	67	old	M	25.39	Fat	JAP	NA	NA	NA	Adenoma	NA	NA
PRJDB4176	SAMD00114742	67	old	F	24.3232	Normal	JAP	III	NA	RC	CRC	NA	NA
PRJDB4176	SAMD00114762	67	old	M	23.597	Normal	JAP	0	NA	Rectum	CRC	NA	NA
PRJDB4176	SAMD00114893	67	old	F	20.1746	Normal	JAP	III	NA	Rectum	CRC	NA	NA
PRJDB4176	SAMD00114894	67	old	F	25.4375	Fat	JAP	III	NA	Rectum	CRC	NA	NA
PRJDB4176	SAMD00114922	67	old	F	21.4573	Normal	JAP	0	NA	RC	CRC	NA	NA
PRJDB4176	SAMD00115090	67	old	F	20.1746	Normal	JAP	III	NA	Rectum	CRC	NA	NA
PRJDB4176	SAMD00164820	67	old	M	30.4772	Obese	JAP	0	NA	RC	CRC	NA	NA
PRJDB4176	SAMD00164829	67	old	M	24.6755	Normal	JAP	III	NA	LC and Rectum	CRC	NA	NA
PRJDB4176	SAMD00164866	67	old	M	21.3333	Normal	JAP	I	NA	RC	CRC	NA	NA
PRJDB4176	SAMD00165005	67	old	M	23.6244	Normal	JAP	II	NA	LC	CRC	NA	NA
PRJDB4176	SAMD00165016	67	old	F	24.4444	Normal	JAP	I	NA	LC	CRC	NA	NA
PRJDB4176	SAMD00114792	67	old	F	26.0417	Fat	JAP	NA	NA	NA	CTR	NA	NA
PRJDB4176	SAMD00114858	67	old	M	21.4536	Normal	JAP	NA	NA	NA	CTR	NA	NA
PRJDB4176	SAMD00114986	67	old	F	19.6752	Normal	JAP	NA	NA	NA	CTR	NA	NA
PRJDB4176	SAMD00115027	67	old	F	20.1733	Normal	JAP	NA	NA	NA	CTR	NA	NA
PRJDB4176	SAMD00115040	67	old	F	22.83	Normal	JAP	NA	NA	NA	CTR	NA	NA
PRJDB4176	SAMD00164756	67	old	F	21.9076	Normal	JAP	NA	NA	NA	CTR	NA	NA
PRJDB4176	SAMD00164773	67	old	M	25.0995	Fat	JAP	NA	NA	NA	CTR	NA	NA
PRJDB4176	SAMD00164923	67	old	F	23.9361	Normal	JAP	NA	NA	NA	CTR	NA	NA
PRJDB4176	SAMD00114732	68	old	F	21.7865	Normal	JAP	II	NA	Rectum	CRC	NA	NA
PRJDB4176	SAMD00114836	68	old	M	23.8751	Normal	JAP	I	NA	Rectum	CRC	NA	NA
PRJDB4176	SAMD00114941	68	old	M	24.7676	Normal	JAP	II	NA	LC	CRC	NA	NA
PRJDB4176	SAMD00115077	68	old	F	21.7865	Normal	JAP	II	NA	Rectum	CRC	NA	NA
PRJDB4176	SAMD00164913	68	old	M	22.9591	Normal	JAP	0	NA	RC	CRC	NA	NA
PRJDB4176	SAMD00164932	68	old	F	25.6837	Fat	JAP	I	NA	LC	CRC	NA	NA
PRJDB4176	SAMD00164992	68	old	F	25.2994	Fat	JAP	II	NA	LC	CRC	NA	NA
PRJDB4176	SAMD00164993	68	old	M	23.4375	Normal	JAP	III	NA	LC	CRC	NA	NA
PRJDB4176	SAMD00165007	68	old	F	22.4323	Normal	JAP	III	NA	RC	CRC	NA	NA
PRJDB4176	SAMD00114718	68	old	M	21.3839	Normal	JAP	NA	NA	NA	CTR	NA	NA
PRJDB4176	SAMD00114779	68	old	M	23.1206	Normal	JAP	NA	NA	NA	CTR	NA	NA
PRJDB4176	SAMD00114815	68	old	M	23.7954	Normal	JAP	NA	NA	NA	CTR	NA	NA
PRJDB4176	SAMD00114881	68	old	F	19.5006	Normal	JAP	NA	NA	NA	CTR	NA	NA
PRJDB4176	SAMD00114990	68	old	M	22.8374	Normal	JAP	NA	NA	NA	CTR	NA	NA
PRJDB4176	SAMD00115055	68	old	M	22.9481	Normal	JAP	NA	NA	NA	CTR	NA	NA
PRJDB4176	SAMD00115062	68	old	F	19.5312	Normal	JAP	NA	NA	NA	CTR	NA	NA
PRJDB4176	SAMD00136653	68	old	F	18.8588	Normal	JAP	NA	NA	NA	CTR	NA	NA
PRJDB4176	SAMD00164748	68	old	F	24.3232	Normal	JAP	NA	NA	NA	CTR	NA	NA
PRJDB4176	SAMD00164824	68	old	F	18.662	Normal	JAP	NA	NA	NA	CTR	NA	NA
PRJDB4176	SAMD00164877	68	old	F	19.2234	Normal	JAP	NA	NA	NA	CTR	NA	NA
PRJDB4176	SAMD00164941	68	old	F	21.1927	Normal	JAP	NA	NA	NA	CTR	NA	NA
PRJDB4176	SAMD00114947	69	old	M	25.01	Fat	JAP	NA	NA	NA	Adenoma	NA	NA
PRJDB4176	SAMD00114801	69	old	M	26.17	Fat	JAP	NA	NA	NA	Adenoma	NA	NA
PRJDB4176	SAMD00114743	69	old	M	22.7583	Normal	JAP	0	NA	LC	CRC	NA	NA
PRJDB4176	SAMD00114763	69	old	F	23.5556	Normal	JAP	III	NA	Rectum	CRC	NA	NA
PRJDB4176	SAMD00114774	69	old	M	19.433	Normal	JAP	I	NA	RC	CRC	NA	NA
PRJDB4176	SAMD00114776	69	old	F	20.6131	Normal	JAP	II	NA	LC	CRC	NA	NA
PRJDB4176	SAMD00114811	69	old	M	16.1415	Low	JAP	I	NA	LC	CRC	NA	NA
PRJDB4176	SAMD00114823	69	old	M	25.7276	Fat	JAP	II	NA	RC	CRC	NA	NA
PRJDB4176	SAMD00114840	69	old	M	21.5139	Normal	JAP	Iv	NA	LC	CRC	NA	NA
PRJDB4176	SAMD00114897	69	old	M	19.3625	Normal	JAP	I	NA	Rectum	CRC	NA	NA
PRJDB4176	SAMD00114910	69	old	M	22.8395	Normal	JAP	I	NA	RC	CRC	NA	NA
PRJDB4176	SAMD00114924	69	old	F	19.7777	Normal	JAP	I	NA	RC	CRC	NA	NA
PRJDB4176	SAMD00115020	69	old	F	25.6369	Fat	JAP	IV	NA	Rectum	CRC	NA	NA
PRJDB4176	SAMD00115074	69	old	M	22.8395	Normal	JAP	I	NA	RC	CRC	NA	NA
PRJDB4176	SAMD00115075	69	old	F	19.7777	Normal	JAP	I	NA	RC	CRC	NA	NA
PRJDB4176	SAMD00115080	69	old	F	20.6131	Normal	JAP	II	NA	LC	CRC	NA	NA
PRJDB4176	SAMD00164694	69	old	F	22.5069	Normal	JAP	IV	NA	Rectum	CRC	NA	NA
PRJDB4176	SAMD00164771	69	old	M	24.6097	Normal	JAP	0	NA	LC	CRC	NA	NA
PRJDB4176	SAMD00164946	69	old	F	18.1787	Low	JAP	0	NA	RC	CRC	NA	NA
PRJDB4176	SAMD00164979	69	old	M	22.7583	Normal	JAP	0	NA	RC	CRC	NA	NA
PRJDB4176	SAMD00164980	69	old	M	25.6801	Fat	JAP	II	NA	LC and RC	CRC	NA	NA
PRJDB4176	SAMD00165006	69	old	M	23.8751	Normal	JAP	I	NA	RC	CRC	NA	NA
PRJDB4176	SAMD00114913	69	old	M	22.1453	Normal	JAP	NA	NA	NA	CTR	NA	NA
PRJDB4176	SAMD00114932	69	old	M	24.281	Normal	JAP	NA	NA	NA	CTR	NA	NA
PRJDB4176	SAMD00114987	69	old	M	24.3911	Normal	JAP	NA	NA	NA	CTR	NA	NA
PRJDB4176	SAMD00114991	69	old	F	22.9591	Normal	JAP	NA	NA	NA	CTR	NA	NA
PRJDB4176	SAMD00115048	69	old	M	23.4586	Normal	JAP	NA	NA	NA	CTR	NA	NA
PRJDB4176	SAMD00115061	69	old	M	22.8625	Normal	JAP	NA	NA	NA	CTR	NA	NA
PRJDB4176	SAMD00115065	69	old	M	21.3068	Normal	JAP	NA	NA	NA	CTR	NA	NA
PRJDB4176	SAMD00164819	69	old	M	22.4082	Normal	JAP	NA	NA	NA	CTR	NA	NA
PRJDB4176	SAMD00164938	69	old	F	23.5304	Normal	JAP	NA	NA	NA	CTR	NA	NA
PRJDB4176	SAMD00164893	70	old	F	18.8	Normal	JAP	NA	NA	NA	Adenoma	NA	NA
PRJDB4176	SAMD00114890	70	old	M	20.9	Normal	JAP	NA	NA	NA	Adenoma	NA	NA
PRJDB4176	SAMD00114988	70	old	F	25.54	Fat	JAP	NA	NA	NA	Adenoma	NA	NA
PRJDB4176	SAMD00114731	70	old	F	21.9076	Normal	JAP	III	NA	LC and RC	CRC	NA	NA
PRJDB4176	SAMD00114777	70	old	M	26.7698	Fat	JAP	I	NA	RC	CRC	NA	NA
PRJDB4176	SAMD00114813	70	old	F	17.3484	Low	JAP	Iv	NA	RC	CRC	NA	NA
PRJDB4176	SAMD00114816	70	old	M	21.048	Normal	JAP	I	NA	Rectum	CRC	NA	NA
PRJDB4176	SAMD00114825	70	old	M	20.5761	Normal	JAP	IV	NA	RC	CRC	NA	NA
PRJDB4176	SAMD00114875	70	old	F	23.1405	Normal	JAP	0	NA	LC	CRC	NA	NA
PRJDB4176	SAMD00114903	70	old	F	23.0681	Normal	JAP	II	NA	RC	CRC	NA	NA
PRJDB4176	SAMD00114931	70	old	M	24.2424	Normal	JAP	III	NA	Rectum	CRC	NA	NA
PRJDB4176	SAMD00115031	70	old	F	24.7325	Normal	JAP	II	NA	LC	CRC	NA	NA
PRJDB4176	SAMD00115082	70	old	F	24.7325	Normal	JAP	II	NA	LC	CRC	NA	NA
PRJDB4176	SAMD00154995	70	old	M	18.9619	Normal	JAP	IV	NA	Rectum	CRC	NA	NA
PRJDB4176	SAMD00114945	70	old	M	24.2215	Normal	JAP	NA	NA	NA	CTR	NA	NA
PRJDB4176	SAMD00114975	70	old	M	29.271	Fat	JAP	NA	NA	NA	CTR	NA	NA
PRJDB4176	SAMD00114976	70	old	M	22.0604	Normal	JAP	NA	NA	NA	CTR	NA	NA
PRJDB4176	SAMD00114998	70	old	M	23.6614	Normal	JAP	NA	NA	NA	CTR	NA	NA
PRJDB4176	SAMD00115001	70	old	M	25.7117	Fat	JAP	NA	NA	NA	CTR	NA	NA
PRJDB4176	SAMD00115033	70	old	M	29.7608	Fat	JAP	NA	NA	NA	CTR	NA	NA
PRJDB4176	SAMD00115044	70	old	F	20.0773	Normal	JAP	NA	NA	NA	CTR	NA	NA
PRJDB4176	SAMD00115047	70	old	M	27.3588	Fat	JAP	NA	NA	NA	CTR	NA	NA
PRJDB4176	SAMD00115063	70	old	F	20.7031	Normal	JAP	NA	NA	NA	CTR	NA	NA
PRJDB4176	SAMD00164805	70	old	F	25.3333	Fat	JAP	NA	NA	NA	CTR	NA	NA
PRJDB4176	SAMD00164894	70	old	F	20.5049	Normal	JAP	NA	NA	NA	CTR	NA	NA
PRJDB4176	SAMD00164955	70	old	F	29.9643	Fat	JAP	NA	NA	NA	CTR	NA	NA
PRJDB4176	SAMD00164964	70	old	M	17.9688	Low	JAP	NA	NA	NA	CTR	NA	NA
PRJDB4176	SAMD00165001	70	old	M	22.68	Normal	JAP	NA	NA	NA	CTR	NA	NA
PRJDB4176	SAMD00164755	71	old	M	18.36	Low	JAP	NA	NA	NA	Adenoma	NA	NA
PRJDB4176	SAMD00114847	71	old	M	21.16	Normal	JAP	NA	NA	NA	Adenoma	NA	NA
PRJDB4176	SAMD00114759	71	old	M	26.2188	Fat	JAP	0	NA	LC and RC	CRC	NA	NA
PRJDB4176	SAMD00114844	71	old	F	31.1111	Obese	JAP	II	NA	Rectum	CRC	NA	NA
PRJDB4176	SAMD00114877	71	old	M	22.4813	Normal	JAP	I	NA	LC	CRC	NA	NA
PRJDB4176	SAMD00115010	71	old	M	27.3438	Fat	JAP	0	NA	LC	CRC	NA	NA
PRJDB4176	SAMD00115026	71	old	F	29.9643	Fat	JAP	I	NA	LC	CRC	NA	NA
PRJDB4176	SAMD00164919	71	old	F	18.4911	Low	JAP	0	NA	LC	CRC	NA	NA
PRJDB4176	SAMD00164974	71	old	F	21.9289	Normal	JAP	I	NA	RC	CRC	NA	NA
PRJDB4176	SAMD00164987	71	old	M	21.0498	Normal	JAP	II	NA	LC	CRC	NA	NA
PRJDB4176	SAMD00114769	71	old	M	25.1559	Fat	JAP	NA	NA	NA	CTR	NA	NA
PRJDB4176	SAMD00114785	71	old	F	24.6094	Normal	JAP	NA	NA	NA	CTR	NA	NA
PRJDB4176	SAMD00114812	71	old	M	22.6474	Normal	JAP	NA	NA	NA	CTR	NA	NA
PRJDB4176	SAMD00114818	71	old	M	22.9421	Normal	JAP	NA	NA	NA	CTR	NA	NA
PRJDB4176	SAMD00114908	71	old	M	23.3844	Normal	JAP	NA	NA	NA	CTR	NA	NA
PRJDB4176	SAMD00114974	71	old	F	18.0172	Low	JAP	NA	NA	NA	CTR	NA	NA
PRJDB4176	SAMD00164855	71	old	F	17.3484	Low	JAP	NA	NA	NA	CTR	NA	NA
PRJDB4176	SAMD00164939	71	old	F	26.635	Fat	JAP	NA	NA	NA	CTR	NA	NA
PRJDB4176	SAMD00114853	72	old	F	17.15	Low	JAP	NA	NA	NA	Adenoma	NA	NA
PRJDB4176	SAMD00164764	72	old	F	19.31	Normal	JAP	NA	NA	NA	Adenoma	NA	NA
PRJDB4176	SAMD00164945	72	old	M	22.13	Normal	JAP	NA	NA	NA	Adenoma	NA	NA
PRJDB4176	SAMD00114831	72	old	M	23.67	Normal	JAP	NA	NA	NA	Adenoma	NA	NA
PRJDB4176	SAMD00164791	72	old	M	49.54	Obese	JAP	NA	NA	NA	Adenoma	NA	NA
PRJDB4176	SAMD00114852	72	old	M	22.0386	Normal	JAP	0	NA	Rectum, LC and RC	CRC	NA	NA
PRJDB4176	SAMD00114948	72	old	M	24.6904	Normal	JAP	II	NA	LC	CRC	NA	NA
PRJDB4176	SAMD00115006	72	old	M	20.9042	Normal	JAP	0	NA	LC	CRC	NA	NA
PRJDB4176	SAMD00164845	72	old	M	23.6652	Normal	JAP	0	NA	Rectum	CRC	NA	NA
PRJDB4176	SAMD00164858	72	old	M	19.9432	Normal	JAP	I	NA	RC	CRC	NA	NA
PRJDB4176	SAMD00164970	72	old	M	24.9135	Normal	JAP	0	NA	LC	CRC	NA	NA
PRJDB4176	SAMD00164988	72	old	F	20.3244	Normal	JAP	0	NA	LC	CRC	NA	NA
PRJDB4176	SAMD00114721	72	old	M	25.2092	Fat	JAP	NA	NA	NA	CTR	NA	NA
PRJDB4176	SAMD00114734	72	old	M	22.1367	Normal	JAP	NA	NA	NA	CTR	NA	NA
PRJDB4176	SAMD00114996	72	old	F	22.3703	Normal	JAP	NA	NA	NA	CTR	NA	NA
PRJDB4176	SAMD00115050	72	old	F	26.3779	Fat	JAP	NA	NA	NA	CTR	NA	NA
PRJDB4176	SAMD00115051	72	old	M	24.2424	Normal	JAP	NA	NA	NA	CTR	NA	NA
PRJDB4176	SAMD00164882	72	old	M	23.0546	Normal	JAP	NA	NA	NA	CTR	NA	NA
PRJDB4176	SAMD00164916	72	old	M	22.9481	Normal	JAP	NA	NA	NA	CTR	NA	NA
PRJDB4176	SAMD00164927	72	old	M	21.7193	Normal	JAP	NA	NA	NA	CTR	NA	NA
PRJDB4176	SAMD00164887	73	old	F	16.65	Low	JAP	NA	NA	NA	Adenoma	NA	NA
PRJDB4176	SAMD00114827	73	old	M	21.01	Normal	JAP	NA	NA	NA	Adenoma	NA	NA
PRJDB4176	SAMD00114855	73	old	M	21.8	Normal	JAP	NA	NA	NA	Adenoma	NA	NA
PRJDB4176	SAMD00114739	73	old	M	22.0581	Normal	JAP	I	NA	Rectum	CRC	NA	NA
PRJDB4176	SAMD00114749	73	old	F	16.8802	Low	JAP	I	NA	Rectum	CRC	NA	NA
PRJDB4176	SAMD00114750	73	old	M	23.3355	Normal	JAP	IV	NA	Rectum	CRC	NA	NA
PRJDB4176	SAMD00114790	73	old	F	26.5731	Fat	JAP	0	NA	RC	CRC	NA	NA
PRJDB4176	SAMD00114799	73	old	M	24.6097	Normal	JAP	I	NA	Rectum	CRC	NA	NA
PRJDB4176	SAMD00114804	73	old	F	19.563	Normal	JAP	II	NA	Rectum	CRC	NA	NA
PRJDB4176	SAMD00114905	73	old	M	22.913	Normal	JAP	II	NA	RC	CRC	NA	NA
PRJDB4176	SAMD00114927	73	old	F	18.3143	Low	JAP	I	NA	RC	CRC	NA	NA
PRJDB4176	SAMD00114951	73	old	M	23.3067	Normal	JAP	I	NA	Rectum	CRC	NA	NA
PRJDB4176	SAMD00114966	73	old	F	20.5457	Normal	JAP	III	NA	RC	CRC	NA	NA
PRJDB4176	SAMD00115011	73	old	F	22.151	Normal	JAP	II	NA	RC	CRC	NA	NA
PRJDB4176	SAMD00115021	73	old	M	22.3214	Normal	JAP	0	NA	LC	CRC	NA	NA
PRJDB4176	SAMD00164822	73	old	M	23.7253	Normal	JAP	0	NA	LC	CRC	NA	NA
PRJDB4176	SAMD00164851	73	old	M	23.8751	Normal	JAP	I	NA	LC and RC	CRC	NA	NA
PRJDB4176	SAMD00164884	73	old	M	21.2031	Normal	JAP	I	NA	RC	CRC	NA	NA
PRJDB4176	SAMD00164928	73	old	F	21.0517	Normal	JAP	I	NA	LC	CRC	NA	NA
PRJDB4176	SAMD00165009	73	old	F	21.4903	Normal	JAP	0	NA	RC	CRC	NA	NA
PRJDB4176	SAMD00165018	73	old	M	19.8413	Normal	JAP	I	NA	RC	CRC	NA	NA
PRJDB4176	SAMD00114770	73	old	M	25.8166	Fat	JAP	NA	NA	NA	CTR	NA	NA
PRJDB4176	SAMD00114876	73	old	M	24.3025	Normal	JAP	NA	NA	NA	CTR	NA	NA
PRJDB4176	SAMD00114926	73	old	F	20.6905	Normal	JAP	NA	NA	NA	CTR	NA	NA
PRJDB4176	SAMD00115022	73	old	F	20.7031	Normal	JAP	NA	NA	NA	CTR	NA	NA
PRJDB4176	SAMD00115060	73	old	M	26.5731	Fat	JAP	NA	NA	NA	CTR	NA	NA
PRJDB4176	SAMD00164849	73	old	F	21.6041	Normal	JAP	NA	NA	NA	CTR	NA	NA
PRJDB4176	SAMD00164986	73	old	M	22.8928	Normal	JAP	NA	NA	NA	CTR	NA	NA
PRJDB4176	SAMD00114751	74	old	F	19.15	Normal	JAP	NA	NA	NA	Adenoma	NA	NA
PRJDB4176	SAMD00164924	74	old	F	20.13	Normal	JAP	NA	NA	NA	Adenoma	NA	NA
PRJDB4176	SAMD00114904	74	old	M	23.05	Normal	JAP	NA	NA	NA	Adenoma	NA	NA
PRJDB4176	SAMD00114828	74	old	M	28.69	Fat	JAP	NA	NA	NA	Adenoma	NA	NA
PRJDB4176	SAMD00114848	74	old	F	25.73	Fat	JAP	I	NA	Rectum	CRC	NA	NA
PRJDB4176	SAMD00114896	74	old	M	25.9516	Fat	JAP	I	NA	Rectum	CRC	NA	NA
PRJDB4176	SAMD00164778	74	old	F	19.4363	Normal	JAP	0	NA	LC	CRC	NA	NA
PRJDB4176	SAMD00164831	74	old	M	22.5466	Normal	JAP	0	NA	RC	CRC	NA	NA
PRJDB4176	SAMD00165017	74	old	F	23.5556	Normal	JAP	II	NA	RC	CRC	NA	NA
PRJDB4176	SAMD00114800	74	old	M	25.0593	Fat	JAP	NA	NA	NA	CTR	NA	NA
PRJDB4176	SAMD00114819	74	old	M	20.6193	Normal	JAP	NA	NA	NA	CTR	NA	NA
PRJDB4176	SAMD00114882	74	old	F	24.3496	Normal	JAP	NA	NA	NA	CTR	NA	NA
PRJDB4176	SAMD00114885	74	old	M	20.7031	Normal	JAP	NA	NA	NA	CTR	NA	NA
PRJDB4176	SAMD00114901	74	old	F	20.83	Normal	JAP	NA	NA	NA	CTR	NA	NA
PRJDB4176	SAMD00114997	74	old	M	20.6852	Normal	JAP	NA	NA	NA	CTR	NA	NA
PRJDB4176	SAMD00115012	74	old	M	19.3337	Normal	JAP	NA	NA	NA	CTR	NA	NA
PRJDB4176	SAMD00115039	74	old	F	23.8048	Normal	JAP	NA	NA	NA	CTR	NA	NA
PRJDB4176	SAMD00164803	74	old	M	22.5896	Normal	JAP	NA	NA	NA	CTR	NA	NA
PRJDB4176	SAMD00164909	74	old	M	24.6094	Normal	JAP	NA	NA	NA	CTR	NA	NA
PRJDB4176	SAMD00165028	74	old	F	19.91	Normal	JAP	NA	NA	NA	CTR	NA	NA
PRJDB4176	SAMD00114821	75	old	M	21.45	Normal	JAP	NA	NA	NA	Adenoma	NA	NA
PRJDB4176	SAMD00114870	75	old	F	18.9745	Normal	JAP	II	NA	RC	CRC	NA	NA
PRJDB4176	SAMD00114964	75	old	F	22.2222	Normal	JAP	III	NA	LC	CRC	NA	NA
PRJDB4176	SAMD00164842	75	old	M	19.7055	Normal	JAP	0	NA	RC	CRC	NA	NA
PRJDB4176	SAMD00164844	75	old	M	22.8625	Normal	JAP	I	NA	Rectum	CRC	NA	NA
PRJDB4176	SAMD00164854	75	old	M	20.9566	Normal	JAP	I	NA	LC	CRC	NA	NA
PRJDB4176	SAMD00164968	75	old	M	21.3039	Normal	JAP	II	NA	LC	CRC	NA	NA
PRJDB4176	SAMD00114730	75	old	F	18.3655	Low	JAP	NA	NA	NA	CTR	NA	NA
PRJDB4176	SAMD00114859	75	old	F	22.6667	Normal	JAP	NA	NA	NA	CTR	NA	NA
PRJDB4176	SAMD00114906	75	old	F	21.1702	Normal	JAP	NA	NA	NA	CTR	NA	NA
PRJDB4176	SAMD00115002	75	old	M	22.3081	Normal	JAP	NA	NA	NA	CTR	NA	NA
PRJDB4176	SAMD00164931	75	old	M	20.1348	Normal	JAP	NA	NA	NA	CTR	NA	NA
PRJDB4176	SAMD00164967	75	old	F	30.2112	Obese	JAP	NA	NA	NA	CTR	NA	NA
PRJDB4176	SAMD00114738	76	old	M	19.17	Normal	JAP	I	NA	LC	CRC	NA	NA
PRJDB4176	SAMD00114808	76	old	M	24.653	Normal	JAP	I	NA	Rectum	CRC	NA	NA
PRJDB4176	SAMD00114978	76	old	F	29.0131	Fat	JAP	0	NA	RC	CRC	NA	NA
PRJDB4176	SAMD00164869	76	old	M	19.0039	Normal	JAP	0	NA	Rectum	CRC	NA	NA
PRJDB4176	SAMD00164981	76	old	M	21.9261	Normal	JAP	0	NA	LC	CRC	NA	NA
PRJDB4176	SAMD00114807	76	old	F	19.1111	Normal	JAP	NA	NA	NA	CTR	NA	NA
PRJDB4176	SAMD00114834	76	old	M	22.1003	Normal	JAP	NA	NA	NA	CTR	NA	NA
PRJDB4176	SAMD00114842	76	old	F	23.4221	Normal	JAP	NA	NA	NA	CTR	NA	NA
PRJDB4176	SAMD00114874	76	old	M	21.7993	Normal	JAP	NA	NA	NA	CTR	NA	NA
PRJDB4176	SAMD00114938	76	old	M	25.9695	Fat	JAP	NA	NA	NA	CTR	NA	NA
PRJDB4176	SAMD00114940	76	old	M	20.7967	Normal	JAP	NA	NA	NA	CTR	NA	NA
PRJDB4176	SAMD00114989	76	old	F	24.974	Normal	JAP	NA	NA	NA	CTR	NA	NA
PRJDB4176	SAMD00115003	76	old	M	23.8281	Normal	JAP	NA	NA	NA	CTR	NA	NA
PRJDB4176	SAMD00115008	76	old	M	23.7954	Normal	JAP	NA	NA	NA	CTR	NA	NA
PRJDB4176	SAMD00115009	76	old	M	25.8806	Fat	JAP	NA	NA	NA	CTR	NA	NA
PRJDB4176	SAMD00164729	76	old	M	22.8625	Normal	JAP	NA	NA	NA	CTR	NA	NA
PRJDB4176	SAMD00164999	76	old	F	21.5019	Normal	JAP	NA	NA	NA	CTR	NA	NA
PRJDB4176	SAMD00164801	77	old	M	19.49	Normal	JAP	NA	NA	NA	Adenoma	NA	NA
PRJDB4176	SAMD00114891	77	old	M	23.3377	Normal	JAP	III	NA	RC	CRC	NA	NA
PRJDB4176	SAMD00114944	77	old	M	24.6097	Normal	JAP	II	NA	RC	CRC	NA	NA
PRJDB4176	SAMD00165000	77	old	F	20.2694	Normal	JAP	I	NA	RC	CRC	NA	NA
PRJDB4176	SAMD00114771	77	old	M	24.6094	Normal	JAP	NA	NA	NA	CTR	NA	NA
PRJDB4176	SAMD00114780	77	old	F	22.8571	Normal	JAP	NA	NA	NA	CTR	NA	NA
PRJDB4176	SAMD00114832	77	old	F	21.2874	Normal	JAP	NA	NA	NA	CTR	NA	NA
PRJDB4176	SAMD00114971	77	old	M	24.4646	Normal	JAP	NA	NA	NA	CTR	NA	NA
PRJDB4176	SAMD00115023	77	old	F	23.634	Normal	JAP	NA	NA	NA	CTR	NA	NA
PRJDB4176	SAMD00115052	77	old	M	30.33	Obese	JAP	NA	NA	NA	CTR	NA	NA
PRJDB4176	SAMD00164806	77	old	M	20.4382	Normal	JAP	NA	NA	NA	CTR	NA	NA
PRJDB4176	SAMD00164865	77	old	M	20.5714	Normal	JAP	NA	NA	NA	CTR	NA	NA
PRJDB4176	SAMD00164874	77	old	M	20.4382	Normal	JAP	NA	NA	NA	CTR	NA	NA
PRJDB4176	SAMD00165023	77	old	F	21.9261	Normal	JAP	NA	NA	NA	CTR	NA	NA
PRJDB4176	SAMD00114983	77	old	F	18.73	Normal	JAP	NA	NA	NA	CTR	NA	NA
PRJDB4176	SAMD00164728	78	old	M	23.03	Normal	JAP	NA	NA	NA	Adenoma	NA	NA
PRJDB4176	SAMD00114752	78	old	M	27.34	Fat	JAP	NA	NA	NA	Adenoma	NA	NA
PRJDB4176	SAMD00114760	78	old	M	22.68	Normal	JAP	III	NA	Rectum	CRC	NA	NA
PRJDB4176	SAMD00114902	78	old	M	29.7211	Fat	JAP	0	NA	Rectum	CRC	NA	NA
PRJDB4176	SAMD00114912	78	old	M	25.9095	Fat	JAP	III	NA	Rectum	CRC	NA	NA
PRJDB4176	SAMD00164880	78	old	F	21.2191	Normal	JAP	0	NA	RC	CRC	NA	NA
PRJDB4176	SAMD00114741	78	old	F	24.0344	Normal	JAP	NA	NA	NA	CTR	NA	NA
PRJDB4176	SAMD00114773	78	old	F	20.4294	Normal	JAP	NA	NA	NA	CTR	NA	NA
PRJDB4176	SAMD00114830	78	old	M	21.0938	Normal	JAP	NA	NA	NA	CTR	NA	NA
PRJDB4176	SAMD00114854	78	old	M	22.151	Normal	JAP	NA	NA	NA	CTR	NA	NA
PRJDB4176	SAMD00114862	78	old	M	22.8624	Normal	JAP	NA	NA	NA	CTR	NA	NA
PRJDB4176	SAMD00164758	78	old	F	20.6905	Normal	JAP	NA	NA	NA	CTR	NA	NA
PRJDB4176	SAMD00164807	78	old	F	24.7737	Normal	JAP	NA	NA	NA	CTR	NA	NA
PRJDB4176	SAMD00164983	78	old	M	23.3091	Normal	JAP	NA	NA	NA	CTR	NA	NA
PRJDB4176	SAMD00164860	79	old	F	17.6693	Low	JAP	I	NA	RC	CRC	NA	NA
PRJDB4176	SAMD00115032	79	old	F	24.4444	Normal	JAP	NA	NA	NA	CTR	NA	NA
PRJDB4176	SAMD00164898	79	old	F	24.6094	Normal	JAP	NA	NA	NA	CTR	NA	NA
PRJEB10878	SZAXPI017584.108	34	young	M	19.4	Normal	CHI	II	T3N0	RC	CRC	NA	1
PRJEB10878	SZAXPI015224.13	44	middle-age	M	22.5	Normal	CHI	I	T2N0	LC	CRC	NA	0
PRJEB10878	SZAXPI003425.1	45	middle-age	F	23	Normal	CHI	I	T1N0	LC	CRC	NA	1
PRJEB10878	SZAXPI017463.36	49	middle-age	F	22.6	Normal	CHI	III	T3N+	Rectum	CRC	NA	1
PRJEB10878	SZAXPI003422.11	50	middle-age	M	25.2	Fat	CHI	I	T1N0	Rectum	CRC	NA	1
PRJEB10878	SZAXPI015240.26	50	middle-age	M	20.5	Normal	CHI	NA	NA	NA	CTR	NA	1
PRJEB10878	SZAXPI015242.30	50	middle-age	M	23.3	Normal	CHI	NA	NA	NA	CTR	NA	1
PRJEB10878	SZAXPI015209.133	51	middle-age	F	19.6	Normal	CHI	I	T1N0	LC	CRC	NA	1
PRJEB10878	SZAXPI017581.93	51	middle-age	M	26.9	Fat	CHI	II	T3N0	Rectum	CRC	NA	1
PRJEB10878	SZAXPI015239.25	51	middle-age	M	21.9	Normal	CHI	NA	NA	NA	CTR	NA	1
PRJEB10878	SZAXPI015244.32	52	middle-age	M	28.4	Fat	CHI	NA	NA	NA	CTR	NA	1
PRJEB10878	SZAXPI015273.95	52	middle-age	M	24.6	Normal	CHI	NA	NA	NA	CTR	NA	0
PRJEB10878	SZAXPI015249.37	53	middle-age	M	19.7	Normal	CHI	NA	NA	NA	CTR	NA	1
PRJEB10878	SZAXPI015252.43	53	middle-age	M	23.4	Normal	CHI	NA	NA	NA	CTR	NA	1
PRJEB10878	SZAXPI015216.169	54	middle-age	M	17.9	Normal	CHI	II	T3N0	Rectum	CRC	NA	1
PRJEB10878	SZAXPI015219.129	54	middle-age	F	29.7	Fat	CHI	II	T3N0	LC	CRC	NA	0
PRJEB10878	SZAXPI015221.142	54	middle-age	F	25.6	Fat	CHI	IV	T4N1M1	LC	CRC	NA	0
PRJEB10878	SZAXPI015263.84	54	middle-age	M	27.7	Fat	CHI	NA	NA	NA	CTR	NA	1
PRJEB10878	SZAXPI003423.8	55	middle-age	M	22.2	Normal	CHI	IV	T3N1M1	Rectum	CRC	NA	0
PRJEB10878	SZAXPI017594.166	55	middle-age	M	25.8	Fat	CHI	III	T3N1	LC	CRC	NA	1
PRJEB10878	SZAXPI015233.19	55	middle-age	M	26.4	Fat	CHI	NA	NA	NA	CTR	NA	1
PRJEB10878	SZAXPI015257.56	55	middle-age	M	22.3	Normal	CHI	NA	NA	NA	CTR	NA	1
PRJEB10878	SZAXPI003412.1	56	middle-age	M	25.6	Fat	CHI	III	T3N1	Rectum	CRC	NA	0
PRJEB10878	SZAXPI015215.20	56	middle-age	M	25.9	Fat	CHI	I	T1N0	NA	CRC	NA	1
PRJEB10878	SZAXPI017455.21	56	middle-age	M	31.3	Obese	CHI	III	T3N1	RC	CRC	NA	1
PRJEB10878	SZAXPI015218.16	57	middle-age	M	23.2	Normal	CHI	II	T3N0	LC	CRC	NA	1
PRJEB10878	SZAXPI003428.6	58	middle-age	F	23.9	Normal	CHI	III	T2N1	Rectum	CRC	NA	0
PRJEB10878	SZAXPI003427.1	58	middle-age	F	21.6	Normal	CHI	NA	NA	NA	CTR	NA	0
PRJEB10878	SZAXPI015228.14	58	middle-age	M	22.3	Normal	CHI	NA	NA	NA	CTR	NA	1
PRJEB10878	SZAXPI015246.34	58	middle-age	M	23.1	Normal	CHI	NA	NA	NA	CTR	NA	0
PRJEB10878	SZAXPI015266.89	58	middle-age	M	26.3	Fat	CHI	NA	NA	NA	CTR	NA	1
PRJEB10878	SZAXPI015274.111	58	middle-age	M	24.5	Normal	CHI	NA	NA	NA	CTR	NA	0
PRJEB10878	SZAXPI003413.4	59	middle-age	F	20.7	Normal	CHI	IV	multiple_liver_met	LC	CRC	NA	0
PRJEB10878	SZAXPI017453.19	59	middle-age	F	27	Fat	CHI	II	T3N0	NA	CRC	NA	1
PRJEB10878	SZAXPI017466.84	59	middle-age	M	24.5	Normal	CHI	II	T3N0	LC	CRC	NA	1
PRJEB10878	SZAXPI015235.21	59	middle-age	M	25.6	Fat	CHI	NA	NA	NA	CTR	NA	0
PRJEB10878	SZAXPI015270.90	59	middle-age	M	23.7	Normal	CHI	NA	NA	NA	CTR	NA	0
PRJEB10878	SZAXPI003415.12	60	old	M	23.2	Normal	CHI	III	T3N2	Rectum	CRC	NA	0
PRJEB10878	SZAXPI015225.18	60	old	M	17.3	Normal	CHI	IV	T3N3M1	LC	CRC	NA	1
PRJEB10878	SZAXPI017451.16	60	old	M	20	Normal	CHI	I	T1N0	NA	CRC	NA	0
PRJEB10878	SZAXPI015265.88	60	old	M	22.5	Normal	CHI	NA	NA	NA	CTR	NA	0
PRJEB10878	SZAXPI003414.3	61	old	M	25.2	Fat	CHI	III	T3N1	LC	CRC	NA	0
PRJEB10878	SZAXPI003436.7	61	old	F	22	Normal	CHI	I	T1N0	Rectum	CRC	NA	0
PRJEB10878	SZAXPI015254.45	61	old	M	21.5	Normal	CHI	NA	NA	NA	CTR	NA	0
PRJEB10878	SZAXPI015272.108	61	old	M	23.7	Normal	CHI	NA	NA	NA	CTR	NA	0
PRJEB10878	SZAXPI017591.140	61	old	M	23.8	Normal	CHI	NA	NA	NA	CTR	NA	0
PRJEB10878	SZAXPI015220.136	62	old	M	22.7	Normal	CHI	III	T3N1	Rectum	CRC	NA	1
PRJEB10878	SZAXPI017461.32	62	old	M	23.5	Normal	CHI	I	T1N0	NA	CRC	NA	0
PRJEB10878	SZAXPI003417.4	62	old	M	21.7	Normal	CHI	NA	NA	NA	CTR	NA	0
PRJEB10878	SZAXPI003433.7	62	old	F	21.4	Normal	CHI	NA	NA	NA	CTR	NA	0
PRJEB10878	SZAXPI015227.13	62	old	F	32.5	Obese	CHI	NA	NA	NA	CTR	NA	0
PRJEB10878	SZAXPI015231.17	62	old	M	23.5	Normal	CHI	NA	NA	NA	CTR	NA	0
PRJEB10878	SZAXPI015255.46	62	old	F	21.1	Normal	CHI	NA	NA	NA	CTR	NA	0
PRJEB10878	SZAXPI017592.142	62	old	M	21.5	Normal	CHI	NA	NA	NA	CTR	NA	0
PRJEB10878	SZAXPI003437.3	63	old	M	24.4	Normal	CHI	I	T1N0	Rectum	CRC	NA	0
PRJEB10878	SZAXPI017465.43	63	old	F	28	Fat	CHI	III	T3N1	Rectum	CRC	NA	0
PRJEB10878	SZAXPI017595.169	63	old	M	22.5	Normal	CHI	IV	T3N1M1	LC	CRC	NA	1
PRJEB10878	SZAXPI003409.8	64	old	M	23.1	Normal	CHI	III	T3N1	Rectum	CRC	NA	1
PRJEB10878	SZAXPI003430.5	64	old	F	29.1	Fat	CHI	III	T3N1	LC	CRC	NA	0
PRJEB10878	SZAXPI015210.17	64	old	M	non	non	CHI	I	T1N0	NA	CRC	NA	0
PRJEB10878	SZAXPI015223.158	64	old	M	24.8	Normal	CHI	II	T3N0	Rectum	CRC	NA	1
PRJEB10878	SZAXPI017589.133	64	old	F	28.3	Fat	CHI	IV	T4N2M1	RC	CRC	NA	0
PRJEB10878	SZAXPI015229.15	64	old	M	24.8	Normal	CHI	NA	NA	NA	CTR	NA	0
PRJEB10878	SZAXPI015234.20	64	old	F	26.4	Fat	CHI	NA	NA	NA	CTR	NA	0
PRJEB10878	SZAXPI015241.27	64	old	M	24.7	Normal	CHI	NA	NA	NA	CTR	NA	0
PRJEB10878	SZAXPI015245.33	64	old	M	25.6	Fat	CHI	NA	NA	NA	CTR	NA	0
PRJEB10878	SZAXPI015247.35	64	old	F	17.1	Normal	CHI	NA	NA	NA	CTR	NA	0
PRJEB10878	SZAXPI015250.39	64	old	F	21.1	Normal	CHI	NA	NA	NA	CTR	NA	0
PRJEB10878	SZAXPI015253.44	64	old	F	22.7	Normal	CHI	NA	NA	NA	CTR	NA	0
PRJEB10878	SZAXPI015256.47	64	old	M	24.1	Normal	CHI	NA	NA	NA	CTR	NA	0
PRJEB10878	SZAXPI015258.57	64	old	F	22.6	Normal	CHI	NA	NA	NA	CTR	NA	0
PRJEB10878	SZAXPI015260.74	64	old	F	22.2	Normal	CHI	NA	NA	NA	CTR	NA	1
PRJEB10878	SZAXPI015267.102	64	old	F	21.3	Normal	CHI	NA	NA	NA	CTR	NA	0
PRJEB10878	SZAXPI003420.4	65	old	M	24.8	Normal	CHI	I	T1N0	LC	CRC	NA	1
PRJEB10878	SZAXPI003419.6	65	old	M	20.7	Normal	CHI	NA	NA	NA	CTR	NA	0
PRJEB10878	SZAXPI015230.16	65	old	F	35.1	Obese	CHI	NA	NA	NA	CTR	NA	0
PRJEB10878	SZAXPI015248.36	65	old	M	22.4	Normal	CHI	NA	NA	NA	CTR	NA	0
PRJEB10878	SZAXPI015261.75	65	old	M	22.5	Normal	CHI	NA	NA	NA	CTR	NA	0
PRJEB10878	SZAXPI015264.87	65	old	F	21.2	Normal	CHI	NA	NA	NA	CTR	NA	0
PRJEB10878	SZAXPI015269.94	65	old	F	20	Normal	CHI	NA	NA	NA	CTR	NA	1
PRJEB10878	SZAXPI015243.31	66	old	F	22.4	Normal	CHI	NA	NA	NA	CTR	NA	1
PRJEB10878	SZAXPI003411.6	67	old	F	24.7	Normal	CHI	III	T3N1	LC	CRC	NA	0
PRJEB10878	SZAXPI003435.11	67	old	M	23.1	Normal	CHI	II	T3N0	LC	CRC	NA	0
PRJEB10878	SZAXPI017590.136	67	old	M	24.9	Normal	CHI	III	T2N1	Rectum	CRC	NA	0
PRJEB10878	SZAXPI017587.113	68	old	M	21.5	Normal	CHI	II	T3N0	LC	CRC	NA	0
PRJEB10878	SZAXPI017593.158	68	old	M	23.7	Normal	CHI	III	T3N2	LC	CRC	NA	0
PRJEB10878	SZAXPI003429.3	68	old	M	21.7	Normal	CHI	NA	NA	NA	CTR	NA	0
PRJEB10878	SZAXPI015212.113	68	old	M	20.4	Normal	CHI	NA	NA	NA	CTR	NA	0
PRJEB10878	SZAXPI015251.41	68	old	F	24.9	Normal	CHI	NA	NA	NA	CTR	NA	0
PRJEB10878	SZAXPI015222.123	69	old	M	29	Fat	CHI	I	T2N0	Rectum	CRC	NA	0
PRJEB10878	SZAXPI017460.27	69	old	F	28.3	Fat	CHI	IV	M1	LC	CRC	NA	0
PRJEB10878	SZAXPI015232.18	69	old	F	24.9	Normal	CHI	NA	NA	NA	CTR	NA	0
PRJEB10878	SZAXPI015268.109	69	old	M	23.8	Normal	CHI	NA	NA	NA	CTR	NA	1
PRJEB10878	SZAXPI015214.19	70	old	M	24.6	Normal	CHI	I	T1N0	NA	CRC	NA	1
PRJEB10878	SZAXPI015237.23	70	old	M	21	Normal	CHI	III	T3N1	RC	CRC	NA	1
PRJEB10878	SZAXPI017585.109	70	old	F	26.7	Fat	CHI	I	T2N0	Rectum	CRC	NA	0
PRJEB10878	SZAXPI015271.93	70	old	F	22.2	Normal	CHI	NA	NA	NA	CTR	NA	0
PRJEB10878	SZAXPI003421.5	71	old	M	25.8	Fat	CHI	I	T2N0	Rectum	CRC	NA	0
PRJEB10878	SZAXPI017454.20	71	old	F	21.2	Normal	CHI	III	T3N1	NA	CRC	NA	0
PRJEB10878	SZAXPI015238.24	71	old	F	26.7	Fat	CHI	NA	NA	NA	CTR	NA	0
PRJEB10878	SZAXPI015259.62	71	old	F	23	Normal	CHI	NA	NA	NA	CTR	NA	0
PRJEB10878	SZAXPI003418.8	72	old	F	26.3	Fat	CHI	II	T3N0	RC	CRC	NA	1
PRJEB10878	SZAXPI003410.3	73	old	M	23.8	Normal	CHI	I	T2N0	Rectum	CRC	NA	0
PRJEB10878	SZAXPI003416.4	73	old	F	17.7	Normal	CHI	I	T2N0	Rectum	CRC	NA	0
PRJEB10878	SZAXPI003432.12	73	old	M	22.7	Normal	CHI	II	T3N0	RC	CRC	NA	0
PRJEB10878	SZAXPI015226.14	73	old	M	24.5	Normal	CHI	II	T4N0	LC	CRC	NA	0
PRJEB10878	SZAXPI017467.87	73	old	M	22.1	Normal	CHI	II	T3N0	RC	CRC	NA	1
PRJEB10878	SZAXPI015262.79	73	old	F	24.1	Normal	CHI	NA	NA	NA	CTR	NA	1
PRJEB10878	SZAXPI015211.166	74	old	F	28.7	Fat	CHI	III	T4N2	Rectum	CRC	NA	1
PRJEB10878	SZAXPI015217.140	74	old	M	26.8	Fat	CHI	III	T4N2	LC	CRC	NA	1
PRJEB10878	SZAXPI017580.90	74	old	F	17.9	Normal	CHI	III	T3N2	Rectum	CRC	NA	1
PRJEB10878	SZAXPI017582.94	74	old	M	24.2	Normal	CHI	III	T2N1	RC	CRC	NA	0
PRJEB10878	SZAXPI003431.1	75	old	F	28.7	Fat	CHI	II	T3N0	LC	CRC	NA	1
PRJEB10878	SZAXPI017468.88	76	old	M	21.9	Normal	CHI	III	T3N1	Rectum	CRC	NA	0
PRJEB10878	SZAXPI003424.12	77	old	M	21.7	Normal	CHI	III	T3N1	LC	CRC	NA	0
PRJEB10878	SZAXPI017452.17	77	old	M	24.5	Normal	CHI	II	T3N0	NA	CRC	NA	0
PRJEB10878	SZAXPI017456.23	77	old	M	22	Normal	CHI	II	T3N0	LC	CRC	NA	0
PRJEB10878	SZAXPI017457.24	77	old	M	23.5	Normal	CHI	II	T3N0	LC	CRC	NA	0
PRJEB10878	SZAXPI017583.102	77	old	M	20.2	Normal	CHI	II	T3N0	Rectum	CRC	NA	0
PRJEB10878	SZAXPI017462.33	78	old	M	27	Fat	CHI	III	T3N2	Rectum	CRC	NA	0
PRJEB10878	SZAXPI017459.26	79	old	F	25.8	Fat	CHI	IV	M	NA	CRC	NA	1
PRJEB10878	SZAXPI017588.123	79	old	M	26.8	Fat	CHI	II	T3N0	RC	CRC	NA	0
PRJEB10878	SZAXPI003434.7	80	old	M	24	Normal	CHI	I	T1N0	Rectum	CRC	NA	0
PRJEB10878	SZAXPI017464.37	81	old	M	18.2	Normal	CHI	III	T3N+	Rectum	CRC	NA	0
PRJEB10878	SZAXPI015213.15	83	old	F	30.4	Obese	CHI	III	T3N1	RC	CRC	NA	0
PRJEB10878	SZAXPI017458.25	83	old	F	22.8	Normal	CHI	II	T3N0	LC	CRC	NA	0
PRJEB10878	SZAXPI017586.111	83	old	F	18.9	Normal	CHI	III	T3N2	Rectum	CRC	NA	0
PRJEB10878	SZAXPI003426.11	89	old	F	23.7	Normal	CHI	II	T3N0	RC	CRC	NA	1
PRJEB12449	MMRS77321055ST	31	young	M	19.64	Normal	USA	NA	NA	NA	CRC	NA	NA
PRJEB12449	MMRS80093644ST	31	young	M	19.58	Normal	USA	NA	NA	NA	CRC	NA	NA
PRJEB12449	MMRS91297590ST	36	young	M	21.34	Normal	USA	NA	NA	NA	CTR	NA	NA
PRJEB12449	MMRS90191266ST	37	young	M	22.5	Normal	USA	NA	NA	NA	CRC	NA	NA
PRJEB12449	MMRS39582183ST	39	young	M	23.46	Normal	USA	NA	NA	NA	CTR	NA	NA
PRJEB12449	MMRS44197125ST	40	middle-age	M	17.43	Normal	USA	NA	NA	NA	CRC	NA	NA
PRJEB12449	MMRS77018926ST	40	middle-age	M	23.73	Normal	USA	NA	NA	NA	CRC	NA	NA
PRJEB12449	MMRS18295921ST	42	middle-age	M	22.03	Normal	USA	NA	NA	NA	CRC	NA	NA
PRJEB12449	MMRS87723283ST	42	middle-age	M	27.61	Fat	USA	NA	NA	NA	CTR	NA	NA
PRJEB12449	MMRS92546335ST	42	middle-age	F	27.21	Fat	USA	NA	NA	NA	CTR	NA	NA
PRJEB12449	MMRS55294627ST	43	middle-age	M	32.03	Obese	USA	NA	NA	NA	CRC	NA	NA
PRJEB12449	MMRS71762412ST	44	middle-age	M	23.36	Normal	USA	NA	NA	NA	CRC	NA	NA
PRJEB12449	MMRS51307502ST	45	middle-age	F	22.62	Normal	USA	NA	NA	NA	CTR	NA	NA
PRJEB12449	MMRS95479054ST	45	middle-age	M	24.36	Normal	USA	NA	NA	NA	CTR	NA	NA
PRJEB12449	MMRS73787048ST	47	middle-age	M	24.4	Normal	USA	NA	NA	NA	CTR	NA	NA
PRJEB12449	MMRS33294861ST	48	middle-age	M	23.09	Normal	USA	NA	NA	NA	CTR	NA	NA
PRJEB12449	MMRS36405092ST	48	middle-age	M	26.4	Fat	USA	NA	NA	NA	CTR	NA	NA
PRJEB12449	MMRS95277876ST	48	middle-age	M	21.52	Normal	USA	NA	NA	NA	CTR	NA	NA
PRJEB12449	MMRS29805707ST	49	middle-age	M	33.38	Obese	USA	NA	NA	NA	CTR	NA	NA
PRJEB12449	MMRS12272136ST	51	middle-age	M	25.82	Fat	USA	NA	NA	NA	CRC	NA	NA
PRJEB12449	MMRS56137463ST	51	middle-age	M	24.81	Normal	USA	NA	NA	NA	CTR	NA	NA
PRJEB12449	MMRS14379078ST	53	middle-age	M	25.01	Fat	USA	NA	NA	NA	CRC	NA	NA
PRJEB12449	MMRS16644320ST	53	middle-age	M	27.89	Fat	USA	NA	NA	NA	CRC	NA	NA
PRJEB12449	MMRS67247116ST	53	middle-age	M	25.39	Fat	USA	NA	NA	NA	CRC	NA	NA
PRJEB12449	MMRS25641480ST	54	middle-age	F	23.49	Normal	USA	NA	NA	NA	CRC	NA	NA
PRJEB12449	MMRS41266697ST	54	middle-age	F	24.02	Normal	USA	NA	NA	NA	CRC	NA	NA
PRJEB12449	MMRS81194191ST	54	middle-age	M	18.56	Normal	USA	NA	NA	NA	CRC	NA	NA
PRJEB12449	MMRS54316675ST	55	middle-age	M	29.65	Fat	USA	NA	NA	NA	CRC	NA	NA
PRJEB12449	MMRS86958796ST	55	middle-age	F	31.61	Obese	USA	NA	NA	NA	CRC	NA	NA
PRJEB12449	MMRS38954404ST	55	middle-age	F	23.8	Normal	USA	NA	NA	NA	CTR	NA	NA
PRJEB12449	MMRS84954772ST	56	middle-age	M	25.82	Fat	USA	NA	NA	NA	CRC	NA	NA
PRJEB12449	MMRS21365932ST	56	middle-age	M	22.96	Normal	USA	NA	NA	NA	CTR	NA	NA
PRJEB12449	MMRS97307143ST	56	middle-age	M	22.71	Normal	USA	NA	NA	NA	CTR	NA	NA
PRJEB12449	MMRS81671217ST	57	middle-age	M	26.38	Fat	USA	NA	NA	NA	CRC	NA	NA
PRJEB12449	MMRS81135225ST	57	middle-age	M	25.11	Fat	USA	NA	NA	NA	CTR	NA	NA
PRJEB12449	MMRS41711735ST	58	middle-age	M	21.11	Normal	USA	NA	NA	NA	CRC	NA	NA
PRJEB12449	MMRS57569834ST	58	middle-age	M	24.53	Normal	USA	NA	NA	NA	CTR	NA	NA
PRJEB12449	MMRS66868025ST	58	middle-age	M	26.78	Fat	USA	NA	NA	NA	CTR	NA	NA
PRJEB12449	MMRS44203591ST	59	middle-age	F	20.37	Normal	USA	NA	NA	NA	CRC	NA	NA
PRJEB12449	MMRS68630931ST	59	middle-age	M	23.62	Normal	USA	NA	NA	NA	CTR	NA	NA
PRJEB12449	MMRS25211151ST	60	old	F	20.47	Normal	USA	NA	NA	NA	CTR	NA	NA
PRJEB12449	MMRS62666492ST	60	old	M	33.43	Obese	USA	NA	NA	NA	CTR	NA	NA
PRJEB12449	MMRS93621581ST	60	old	M	23.12	Normal	USA	NA	NA	NA	CTR	NA	NA
PRJEB12449	MMRS51728985ST	61	old	M	24.41	Normal	USA	NA	NA	NA	CRC	NA	NA
PRJEB12449	MMRS20257302ST	62	old	F	20.67	Normal	USA	NA	NA	NA	CTR	NA	NA
PRJEB12449	MMRS61683006ST	62	old	F	25.82	Fat	USA	NA	NA	NA	CTR	NA	NA
PRJEB12449	MMRS43939546ST	63	old	F	25.68	Fat	USA	NA	NA	NA	CRC	NA	NA
PRJEB12449	MMRS72980899ST	63	old	M	21.25	Normal	USA	NA	NA	NA	CRC	NA	NA
PRJEB12449	MMRS17603756ST	63	old	F	16.83	Normal	USA	NA	NA	NA	CTR	NA	NA
PRJEB12449	MMRS35808664ST	63	old	M	31.58	Obese	USA	NA	NA	NA	CTR	NA	NA
PRJEB12449	MMRS51737257ST	63	old	M	25.38	Fat	USA	NA	NA	NA	CTR	NA	NA
PRJEB12449	MMRS54246132ST	63	old	M	23.96	Normal	USA	NA	NA	NA	CTR	NA	NA
PRJEB12449	MMRS64281551ST	63	old	F	28.32	Fat	USA	NA	NA	NA	CTR	NA	NA
PRJEB12449	MMRS65742083ST	63	old	M	24.78	Normal	USA	NA	NA	NA	CTR	NA	NA
PRJEB12449	MMRS15137911ST	64	old	F	35.7	Obese	USA	NA	NA	NA	CRC	NA	NA
PRJEB12449	MMRS42780924ST	65	old	M	31.38	Obese	USA	NA	NA	NA	CRC	NA	NA
PRJEB12449	MMRS51410669ST	65	old	M	21.14	Normal	USA	NA	NA	NA	CRC	NA	NA
PRJEB12449	MMRS65945127ST	65	old	M	32.07	Obese	USA	NA	NA	NA	CRC	NA	NA
PRJEB12449	MMRS78791111ST	65	old	M	24.33	Normal	USA	NA	NA	NA	CRC	NA	NA
PRJEB12449	MMRS86178473ST	65	old	M	25.1	Fat	USA	NA	NA	NA	CRC	NA	NA
PRJEB12449	MMRS11288076ST	65	old	M	23.49	Normal	USA	NA	NA	NA	CTR	NA	NA
PRJEB12449	MMRS11932626ST	65	old	M	29.56	Fat	USA	NA	NA	NA	CTR	NA	NA
PRJEB12449	MMRS44587603ST	66	old	F	31.47	Obese	USA	NA	NA	NA	CRC	NA	NA
PRJEB12449	MMRS85382779ST	66	old	M	21.57	Normal	USA	NA	NA	NA	CRC	NA	NA
PRJEB12449	MMRS96422329ST	66	old	M	22.31	Normal	USA	NA	NA	NA	CRC	NA	NA
PRJEB12449	MMRS79893829ST	66	old	M	28.21	Fat	USA	NA	NA	NA	CTR	NA	NA
PRJEB12449	MMRS47685461ST	67	old	M	33.2	Obese	USA	NA	NA	NA	CRC	NA	NA
PRJEB12449	MMRS99045180ST	67	old	F	30.04	Obese	USA	NA	NA	NA	CRC	NA	NA
PRJEB12449	MMRS57276462ST	67	old	M	30.5	Obese	USA	NA	NA	NA	CTR	NA	NA
PRJEB12449	MMRS84159866ST	67	old	F	18.64	Normal	USA	NA	NA	NA	CTR	NA	NA
PRJEB12449	MMRS84085284ST	68	old	M	22.15	Normal	USA	NA	NA	NA	CTR	NA	NA
PRJEB12449	MMRS85438660ST	68	old	M	23.01	Normal	USA	NA	NA	NA	CTR	NA	NA
PRJEB12449	MMRS95674036ST	68	old	F	38.37	Obese	USA	NA	NA	NA	CTR	NA	NA
PRJEB12449	MMRS62376181ST	69	old	F	20.8	Normal	USA	NA	NA	NA	CRC	NA	NA
PRJEB12449	MMRS97052561ST	69	old	F	27.76	Fat	USA	NA	NA	NA	CRC	NA	NA
PRJEB12449	MMRS17963147ST	69	old	M	24.07	Normal	USA	NA	NA	NA	CTR	NA	NA
PRJEB12449	MMRS24340226ST	70	old	M	25.06	Fat	USA	NA	NA	NA	CRC	NA	NA
PRJEB12449	MMRS39415781ST	70	old	F	28.62	Fat	USA	NA	NA	NA	CTR	NA	NA
PRJEB12449	MMRS62192467ST	70	old	F	31.17	Obese	USA	NA	NA	NA	CTR	NA	NA
PRJEB12449	MMRS34525504ST	71	old	M	24.74	Normal	USA	NA	NA	NA	CRC	NA	NA
PRJEB12449	MMRS43563715ST	71	old	M	22.59	Normal	USA	NA	NA	NA	CRC	NA	NA
PRJEB12449	MMRS64281211ST	71	old	M	27.83	Fat	USA	NA	NA	NA	CRC	NA	NA
PRJEB12449	MMRS93508324ST	71	old	F	non	non	USA	NA	NA	NA	CRC	NA	NA
PRJEB12449	MMRS85548821ST	71	old	M	23.24	Normal	USA	NA	NA	NA	CTR	NA	NA
PRJEB12449	MMRS92544445ST	72	old	F	27.8	Fat	USA	NA	NA	NA	CRC	NA	NA
PRJEB12449	MMRS34569532ST	72	old	M	23.15	Normal	USA	NA	NA	NA	CTR	NA	NA
PRJEB12449	MMRS65862658ST	72	old	M	23.63	Normal	USA	NA	NA	NA	CTR	NA	NA
PRJEB12449	MMRS31306426ST	73	old	M	25.82	Fat	USA	NA	NA	NA	CRC	NA	NA
PRJEB12449	MMRS88581325ST	73	old	F	23.92	Normal	USA	NA	NA	NA	CTR	NA	NA
PRJEB12449	MMRS47662059ST	74	old	M	23.6	Normal	USA	NA	NA	NA	CRC	NA	NA
PRJEB12449	MMRS72802364ST	74	old	M	non	non	USA	NA	NA	NA	CRC	NA	NA
PRJEB12449	MMRS38861560ST	76	old	F	22.15	Normal	USA	NA	NA	NA	CTR	NA	NA
PRJEB12449	MMRS40913371ST	76	old	F	26.88	Fat	USA	NA	NA	NA	CTR	NA	NA
PRJEB12449	MMRS94549160ST	76	old	M	23.82	Normal	USA	NA	NA	NA	CTR	NA	NA
PRJEB12449	MMRS77487595ST	78	old	M	22.55	Normal	USA	NA	NA	NA	CRC	NA	NA
PRJEB12449	MMRS67096717ST	79	old	M	35.18	Obese	USA	NA	NA	NA	CTR	NA	NA
PRJEB12449	MMRS86168210ST	79	old	M	21.28	Normal	USA	NA	NA	NA	CTR	NA	NA
PRJEB12449	MMRS32573774ST	82	old	M	20.52	Normal	USA	NA	NA	NA	CTR	NA	NA
PRJEB12449	MMRS68910755ST	83	old	F	16.83	Normal	USA	NA	NA	NA	CRC	NA	NA
PRJEB12449	MMRS14602194ST	84	old	F	non	non	USA	NA	NA	NA	CRC	NA	NA
PRJEB12449	MMRS97327636ST	84	old	M	23.48	Normal	USA	NA	NA	NA	CRC	NA	NA
PRJEB12449	MMRS59699117ST	85	old	M	22.8	Normal	USA	NA	NA	NA	CRC	NA	NA
PRJEB12449	MMRS65205033ST	89	old	F	22.67	Normal	USA	NA	NA	NA	CRC	NA	NA
PRJEB27928	CCMD85661207ST.11.0	28	young	M	24.6	Normal	DE	NA	NA	NA	CTR	NA	NA
PRJEB27928	CCMD35801800ST.11.0	29	young	F	30.5	Obese	DE	NA	NA	NA	CTR	NA	NA
PRJEB27928	CCMD72895164ST.21.0	34	young	M	26.8	Fat	DE	IV	T4N2M1	Sigma	CRC	NA	NA
PRJEB27928	CCMD50071957ST.21.0	35	young	F	22	Normal	DE	II	T4N0M0	Sigma	CRC	NA	NA
PRJEB27928	CCMD98702133ST.11.0	37	young	M	24.5	Normal	DE	NA	NA	NA	CTR	NA	NA
PRJEB27928	CCMD99440714ST.11.0	39	young	M	24.9	Normal	DE	NA	NA	NA	CTR	NA	NA
PRJEB27928	CCMD34381688ST.21.0	41	middle-age	M	21.9	Normal	DE	III	T2N1M0	Sigma	CRC	NA	NA
PRJEB27928	CCMD49025643ST.11.0	41	middle-age	M	23.8	Normal	DE	NA	NA	NA	CTR	NA	NA
PRJEB27928	CCMD90311071ST.21.0	43	middle-age	F	22	Normal	DE	IV	T4N2M1	RC	CRC	NA	NA
PRJEB27928	CCMD37575804ST.11.0	44	middle-age	M	25	Fat	DE	NA	NA	NA	CTR	NA	NA
PRJEB27928	CCMD10032470ST.11.0	45	middle-age	M	30.7	Obese	DE	NA	NA	NA	CTR	NA	NA
PRJEB27928	CCMD29706695ST.11.0	45	middle-age	M	22	Normal	DE	NA	NA	NA	CTR	NA	NA
PRJEB27928	CCMD93755960ST.11.0	45	middle-age	F	27	Fat	DE	NA	NA	NA	CTR	NA	NA
PRJEB27928	CCMD49942357ST.11.0	46	middle-age	M	26	Fat	DE	NA	NA	NA	CTR	NA	NA
PRJEB27928	CCMD30627121ST.11.0	48	middle-age	F	25.4	Fat	DE	NA	NA	NA	CTR	NA	NA
PRJEB27928	CCMD74592084ST.11.0	48	middle-age	M	23	Normal	DE	NA	NA	NA	CTR	NA	NA
PRJEB27928	CCMD95433940ST.21.0	49	middle-age	F	26.5	Fat	DE	0	TisN0M0	RC	CRC	NA	NA
PRJEB27928	CCMD65406197ST.11.0	50	middle-age	F	32.1	Obese	DE	0	TisN0M0	TODO	CRC	NA	NA
PRJEB27928	CCMD22852639ST.11.0	50	middle-age	F	23.4	Normal	DE	NA	NA	NA	CTR	NA	NA
PRJEB27928	CCMD26625622ST.11.0	50	middle-age	M	21.6	Normal	DE	NA	NA	NA	CTR	NA	NA
PRJEB27928	CCMD51154251ST.11.0	50	middle-age	M	22.6	Normal	DE	NA	NA	NA	CTR	NA	NA
PRJEB27928	CCMD63399960ST.21.0	51	middle-age	M	27.75	Fat	DE	IV	T3N1M1	Rectum	CRC	NA	NA
PRJEB27928	CCMD93344354ST.21.0	51	middle-age	M	29.7	Fat	DE	IV	T3N2M1	Sigma	CRC	NA	NA
PRJEB27928	CCMD30626189ST.11.0	51	middle-age	M	26	Fat	DE	NA	NA	NA	CTR	NA	NA
PRJEB27928	CCMD89643949ST.11.0	51	middle-age	F	25.6	Fat	DE	NA	NA	NA	CTR	NA	NA
PRJEB27928	CCMD89306485ST.11.0	52	middle-age	M	29.9	Fat	DE	II	T3N0M0	Rectum	CRC	NA	NA
PRJEB27928	CCMD86707194ST.21.0	53	middle-age	F	30.5	Obese	DE	I	T1N0M0	RC	CRC	NA	NA
PRJEB27928	CCMD39882286ST.11.0	53	middle-age	M	18.5	Normal	DE	NA	NA	NA	CTR	NA	NA
PRJEB27928	CCMD45004878ST.11.0	53	middle-age	M	26	Fat	DE	NA	NA	NA	CTR	NA	NA
PRJEB27928	CCMD46727384ST.11.0	53	middle-age	F	24	Normal	DE	NA	NA	NA	CTR	NA	NA
PRJEB27928	CCMD75147712ST.11.0	53	middle-age	F	23	Normal	DE	NA	NA	NA	CTR	NA	NA
PRJEB27928	CCMD89107682ST.11.0	54	middle-age	F	24.6	Normal	DE	NA	NA	NA	CTR	NA	NA
PRJEB27928	CCMD87156761ST.21.0	55	middle-age	M	27.5	Fat	DE	I	T2N0M0	LC	CRC	NA	NA
PRJEB27928	CCMD27867141ST.11.0	55	middle-age	F	18	Normal	DE	NA	NA	NA	CTR	NA	NA
PRJEB27928	CCMD71242853ST.11.0	56	middle-age	F	30	Obese	DE	I	T2N0M0	Rectum	CRC	NA	NA
PRJEB27928	CCMD39157124ST.11.0	56	middle-age	M	25	Fat	DE	NA	NA	NA	CTR	NA	NA
PRJEB27928	CCMD32288175ST.11.0	57	middle-age	F	22	Normal	DE	NA	NA	NA	CTR	NA	NA
PRJEB27928	CCMD54057834ST.11.0	57	middle-age	F	21	Normal	DE	NA	NA	NA	CTR	NA	NA
PRJEB27928	CCMD73128545ST.11.0	57	middle-age	F	22	Normal	DE	NA	NA	NA	CTR	NA	NA
PRJEB27928	CCMD48236717ST.21.0	58	middle-age	F	32.4	Obese	DE	I	T2N0M0	Rectum	CRC	NA	NA
PRJEB27928	CCMD51864103ST.21.0	58	middle-age	M	25	Fat	DE	II	T3N0M0	Rectum	CRC	NA	NA
PRJEB27928	CCMD72666896ST.11.0	58	middle-age	F	23.8	Normal	DE	NA	NA	NA	CTR	NA	NA
PRJEB27928	CCMD89967135ST.11.0	58	middle-age	F	27	Fat	DE	NA	NA	NA	CTR	NA	NA
PRJEB27928	CCMD46222674ST.21.0	59	middle-age	M	23.7	Normal	DE	IV	T3N0M1	Rectum	CRC	NA	NA
PRJEB27928	CCMD98531134ST.11.0	59	middle-age	M	26.5	Fat	DE	IV	T3N1aM1	Rectum	CRC	NA	NA
PRJEB27928	CCMD17410933ST.11.0	59	middle-age	F	22.5	Normal	DE	NA	NA	NA	CTR	NA	NA
PRJEB27928	CCMD18579000ST.11.0	59	middle-age	F	22.7	Normal	DE	NA	NA	NA	CTR	NA	NA
PRJEB27928	CCMD25475945ST.11.0	59	middle-age	F	22	Normal	DE	NA	NA	NA	CTR	NA	NA
PRJEB27928	CCMD98198513ST.11.0	59	middle-age	F	32.3	Obese	DE	NA	NA	NA	CTR	NA	NA
PRJEB27928	CCMD71915439ST.11.0	60	old	F	35.8	Obese	DE	IV	T3N1bM1	LC	CRC	NA	NA
PRJEB27928	CCMD72690923ST.11.0	60	old	M	19.7	Normal	DE	II	T3N0M0	Rectum	CRC	NA	NA
PRJEB27928	CCMD79349503ST.11.0	60	old	F	21.9	Normal	DE	I	T1N0M0	Rectum	CRC	NA	NA
PRJEB27928	CCMD35081859ST.11.0	60	old	F	25.8	Fat	DE	NA	NA	NA	CTR	NA	NA
PRJEB27928	CCMD76409700ST.11.0	60	old	F	23	Normal	DE	NA	NA	NA	CTR	NA	NA
PRJEB27928	CCMD35633353ST.11.0	61	old	M	25	Fat	DE	IV	T4aN2bM1b	Rectum	CRC	NA	NA
PRJEB27928	CCMD49461418ST.11.0	61	old	M	21.6	Normal	DE	III	T3N1M0	Rectum	CRC	NA	NA
PRJEB27928	CCMD59583015ST.11.0	61	old	F	24	Normal	DE	IV	T2N1bM0	Rectum	CRC	NA	NA
PRJEB27928	CCMD23541216ST.11.0	61	old	M	19.9	Normal	DE	NA	NA	NA	CTR	NA	NA
PRJEB27928	CCMD41202658ST.11.0	61	old	F	25.4	Fat	DE	NA	NA	NA	CTR	NA	NA
PRJEB27928	CCMD53508245ST.11.0	61	old	M	27	Fat	DE	NA	NA	NA	CTR	NA	NA
PRJEB27928	CCMD45988061ST.21.0	62	old	F	26.6	Fat	DE	I	T2N0M0	Rectum	CRC	NA	NA
PRJEB27928	CCMD76222476ST.11.0	62	old	F	21	Normal	DE	III	T3N2bM0	Rectum	CRC	NA	NA
PRJEB27928	CCMD10191450ST.11.0	62	old	F	28.5	Fat	DE	NA	NA	NA	CTR	NA	NA
PRJEB27928	CCMD18829815ST.11.0	62	old	F	27	Fat	DE	NA	NA	NA	CTR	NA	NA
PRJEB27928	CCMD18872694ST.21.0	63	old	M	25	Fat	DE	III	T3N1M0	Rectum	CRC	NA	NA
PRJEB27928	CCMD19168690ST.11.0	63	old	F	25.8	Fat	DE	II	T3N0M0	TODO	CRC	NA	NA
PRJEB27928	CCMD65222621ST.11.0	63	old	F	28.8	Fat	DE	II	T3N0M0	LC	CRC	NA	NA
PRJEB27928	CCMD50529145ST.11.0	63	old	F	20	Normal	DE	NA	NA	NA	CTR	NA	NA
PRJEB27928	CCMD31009081ST.11.0	64	old	M	26.8	Fat	DE	NA	NA	NA	CTR	NA	NA
PRJEB27928	CCMD32965613ST.11.0	64	old	M	27.6	Fat	DE	NA	NA	NA	CTR	NA	NA
PRJEB27928	CCMD50300306ST.11.0	64	old	M	24.6	Normal	DE	NA	NA	NA	CTR	NA	NA
PRJEB27928	CCMD59540613ST.11.0	64	old	M	25.4	Fat	DE	NA	NA	NA	CTR	NA	NA
PRJEB27928	CCMD66848156ST.11.0	64	old	F	21	Normal	DE	NA	NA	NA	CTR	NA	NA
PRJEB27928	CCMD68973846ST.11.0	64	old	F	22.8	Normal	DE	NA	NA	NA	CTR	NA	NA
PRJEB27928	CCMD40701343ST.21.0	65	old	M	27.7	Fat	DE	II	T3N0M0	Sigma	CRC	NA	NA
PRJEB27928	CCMD51228890ST.11.0	65	old	M	32.7	Obese	DE	NA	NA	NA	CTR	NA	NA
PRJEB27928	CCMD26709089ST.21.0	66	old	M	25.5	Fat	DE	IV	T1N0M1	LC	CRC	NA	NA
PRJEB27928	CCMD64503764ST.21.0	66	old	M	31	Obese	DE	I	T2N0M0	Rectum	CRC	NA	NA
PRJEB27928	CCMD92404903ST.11.0	66	old	F	23	Normal	DE	II	T3N0M0	Rectum	CRC	NA	NA
PRJEB27928	CCMD56948710ST.11.0	66	old	M	30	Obese	DE	NA	NA	NA	CTR	NA	NA
PRJEB27928	CCMD42956136ST.11.0	67	old	F	30	Obese	DE	II	T3N0M0	TODO	CRC	NA	NA
PRJEB27928	CCMD74930188ST.21.0	67	old	M	30	Obese	DE	II	T3N0M0	RC	CRC	NA	NA
PRJEB27928	CCMD41521570ST.11.0	67	old	M	24.4	Normal	DE	NA	NA	NA	CTR	NA	NA
PRJEB27928	CCMD86114146ST.21.0	68	old	M	22.7	Normal	DE	IV	T3N2M1	Rectum	CRC	NA	NA
PRJEB27928	CCMD46947453ST.21.0	69	old	M	24.31	Normal	DE	I	T1N0M0	Rectum	CRC	NA	NA
PRJEB27928	CCMD85481373ST.11.0	69	old	F	25	Fat	DE	NA	NA	NA	CTR	NA	NA
PRJEB27928	CCMD79987997ST.21.0	70	old	M	25	Fat	DE	I	T2N0M0	Sigma	CRC	NA	NA
PRJEB27928	CCMD99929634ST.11.0	70	old	M	26.7	Fat	DE	NA	NA	NA	CTR	NA	NA
PRJEB27928	CCMD35802077ST.21.0	71	old	M	29.7	Fat	DE	II	T3N0M0	RC	CRC	NA	NA
PRJEB27928	CCMD88272491ST.21.0	72	old	M	27.7	Fat	DE	0	TisN0M0	Rectum	CRC	NA	NA
PRJEB27928	CCMD60079086ST.21.0	73	old	F	22.4	Normal	DE	I	T2N0M0	Sigma	CRC	NA	NA
PRJEB27928	CCMD95676152ST.11.0	73	old	M	25	Fat	DE	I	T2N0M0	Rectum	CRC	NA	NA
PRJEB27928	CCMD28738636ST.11.0	73	old	M	24.8	Normal	DE	NA	NA	NA	CTR	NA	NA
PRJEB27928	CCMD67373733ST.11.0	73	old	M	24.5	Normal	DE	NA	NA	NA	CTR	NA	NA
PRJEB27928	CCMD14479708ST.21.0	74	old	M	25.5	Fat	DE	IV	T3N0M1	RC	CRC	NA	NA
PRJEB27928	CCMD15562448ST.11.0	74	old	M	22.9	Normal	DE	NA	NA	NA	CTR	NA	NA
PRJEB27928	CCMD12232071ST.21.0	75	old	M	27.8	Fat	DE	III	T3N2M0	RC	CRC	NA	NA
PRJEB27928	CCMD31134579ST.11.0	75	old	M	21.5	Normal	DE	NA	NA	NA	CTR	NA	NA
PRJEB27928	CCMD45812507ST.11.0	75	old	M	30	Obese	DE	NA	NA	NA	CTR	NA	NA
PRJEB27928	CCMD50538120ST.11.0	75	old	M	22.9	Normal	DE	NA	NA	NA	CTR	NA	NA
PRJEB27928	CCMD53522274ST.11.0	75	old	F	19	Normal	DE	NA	NA	NA	CTR	NA	NA
PRJEB27928	CCMD38158721ST.11.0	76	old	M	29.5	Fat	DE	NA	NA	NA	CTR	NA	NA
PRJEB27928	CCMD82866709ST.21.0	77	old	F	26	Fat	DE	II	T3N0M0	LC	CRC	NA	NA
PRJEB27928	CCMD52117727ST.11.0	79	old	M	22.4	Normal	DE	II	T3N0M0	RC	CRC	NA	NA
PRJEB27928	CCMD64776337ST.21.0	79	old	F	26.4	Fat	DE	I	T1N0M0	Rectum	CRC	NA	NA
PRJEB27928	CCMD21703880ST.11.0	80	old	M	28.4	Fat	DE	III	T3N1aM0	RC	CRC	NA	NA
PRJEB27928	CCMD27463710ST.11.0	81	old	M	26	Fat	DE	II	T3N0M0	RC	CRC	NA	NA
PRJEB27928	CCMD52145360ST.11.0	81	old	M	24	Normal	DE	III	T3N2aM0	Rectum	CRC	NA	NA
PRJEB27928	CCMD95431029ST.11.0	84	old	M	24	Normal	DE	II	T3N0M0	Rectum	CRC	NA	NA
PRJEB27928	CCMD21593359ST.11.0	85	old	F	19.7	Normal	DE	III	T4aN1aM0	RC	CRC	NA	NA
PRJEB27928	CCMD42428553ST.21.0	87	old	M	22	Normal	DE	IV	T2N0M1	Sigma	CRC	NA	NA
PRJEB27928	CCMD96553385ST.21.0	90	old	M	27.7	Fat	DE	III	T3N2M0	RC	CRC	NA	NA
PRJEB6070	CCIS10706551ST.3.0	25	young	M	24	Normal	FR	NA	NA	NA	CTR	Negative	NA
PRJEB6070	CCIS03473770ST.4.0	29	young	M	24	Normal	FR	NA	NA	NA	CTR	Negative	NA
PRJEB6070	CCIS02124300ST.4.0	35	young	M	23	Normal	FR	NA	NA	NA	CTR	Negative	NA
PRJEB6070	CCIS15794887ST.4.0	37	young	F	18	Normal	FR	NA	NA	NA	CTR	Negative	NA
PRJEB6070	CCIS82944710ST.20.0	38	young	F	22	Normal	FR	NA	NA	NA	CTR	Negative	NA
PRJEB6070	CCIS76845094ST.20.0	44	middle-age	M	20	Normal	FR	IV	T3N1M1	RC	CRC	Positive	NA
PRJEB6070	CCIS11362406ST.4.0	44	middle-age	F	26	Fat	FR	NA	NA	NA	CTR	Negative	NA
PRJEB6070	CCIS53557295ST.4.0	45	middle-age	M	24	Normal	FR	NA	NA	Sigma	Adenoma	Negative	NA
PRJEB6070	CCIS55531770ST.4.0	45	middle-age	F	24	Normal	FR	NA	NA	Sigma	Adenoma	Negative	NA
PRJEB6070	CCIS84543192ST.4.0	45	middle-age	F	28	Fat	FR	I	T2N0M0	Rectum	CRC	Positive	NA
PRJEB6070	CCIS16326685ST.4.0	46	middle-age	F	29	Fat	FR	NA	NA	NA	CTR	Negative	NA
PRJEB6070	CCIS44676181ST.4.0	48	middle-age	F	21	Normal	FR	NA	NA	Rectum	Adenoma	Negative	NA
PRJEB6070	CCIS83870198ST.4.0	48	middle-age	F	24	Normal	FR	I	T1N0M0	LC	CRC	Negative	NA
PRJEB6070	CCIS81710917ST.20.0	49	middle-age	M	20	Normal	FR	NA	NA	Rectum	Adenoma	Negative	NA
PRJEB6070	CCIS63910149ST.4.0	49	middle-age	F	23	Normal	FR	NA	NA	NA	CTR	Negative	NA
PRJEB6070	CCIS71301801ST.4.0	50	middle-age	F	24	Normal	FR	I	T1N0M0	Rectum	CRC	Positive	NA
PRJEB6070	CCIS29688262ST.20.0	50	middle-age	M	25	Fat	FR	NA	NA	NA	CTR	Negative	NA
PRJEB6070	CCIS12656533ST.4.0	51	middle-age	M	30	Obese	FR	IV	T2N1M1	Rectum	CRC	Negative	NA
PRJEB6070	CCIS82146115ST.4.0	51	middle-age	M	24	Normal	FR	IV	T3N1M1	RC	CRC	Negative	NA
PRJEB6070	CCIS48579360ST.4.0	52	middle-age	F	23	Normal	FR	NA	NA	Rectum	Adenoma	Negative	NA
PRJEB6070	CCIS54027808ST.4.0	52	middle-age	M	33	Obese	FR	NA	NA	LC	Adenoma	Positive	NA
PRJEB6070	CCIS27304052ST.3.0	52	middle-age	F	20	Normal	FR	NA	NA	NA	CTR	Negative	NA
PRJEB6070	CCIS95097901ST.4.0	52	middle-age	M	24	Normal	FR	NA	NA	NA	CTR	Negative	NA
PRJEB6070	CCIS32105356ST.4.0	53	middle-age	M	30	Obese	FR	NA	NA	LC/RC	Adenoma	Negative	NA
PRJEB6070	CCIS50369211ST.20.0	53	middle-age	F	33	Obese	FR	NA	NA	RC	Adenoma	Negative	NA
PRJEB6070	CCIS52370277ST.4.0	53	middle-age	M	25	Fat	FR	IV	T4N1M1	LC	CRC	Negative	NA
PRJEB6070	CCIS00281083ST.3.0	53	middle-age	M	32	Obese	FR	NA	NA	NA	CTR	Negative	NA
PRJEB6070	CCIS98482370ST.3.0	53	middle-age	F	30	Obese	FR	NA	NA	NA	CTR	Negative	NA
PRJEB6070	CCIS46467422ST.4.0	54	middle-age	F	22	Normal	FR	III	T3N1M0	RC	CRC	Negative	NA
PRJEB6070	CCIS16561622ST.4.0	54	middle-age	M	26	Fat	FR	NA	NA	NA	CTR	Negative	NA
PRJEB6070	CCIS70398272ST.4.0	55	middle-age	M	24	Normal	FR	NA	NA	RC	Adenoma	Negative	NA
PRJEB6070	CCIS98832363ST.4.0	55	middle-age	F	25	Fat	FR	III	T3N1M0	LC	CRC	Positive	NA
PRJEB6070	CCIS45571137ST.3.0	55	middle-age	F	20	Normal	FR	NA	NA	NA	CTR	Negative	NA
PRJEB6070	CCIS15704761ST.4.0	56	middle-age	F	non	non	FR	IV	T4N1M1	Sigma	CRC	Negative	NA
PRJEB6070	CCIS62605362ST.3.0	56	middle-age	F	23	Normal	FR	II	T3N0M0	RC	CRC	Positive	NA
PRJEB6070	CCIS11558985ST.4.0	56	middle-age	F	non	non	FR	NA	NA	NA	CTR	Negative	NA
PRJEB6070	CCIS82507866ST.3.0	57	middle-age	M	24	Normal	FR	NA	NA	NA	CTR	Negative	NA
PRJEB6070	CCIS11019776ST.4.0	58	middle-age	M	22	Normal	FR	NA	NA	LC/RC	Adenoma	Negative	NA
PRJEB6070	CCIS06260551ST.3.0	58	middle-age	M	24	Normal	FR	IV	T3N1M1	LC	CRC	Negative	NA
PRJEB6070	CCIS24898163ST.4.0	59	middle-age	M	31	Obese	FR	NA	NA	Rectum	Adenoma	Negative	NA
PRJEB6070	CCIS37250421ST.4.0	59	middle-age	F	21	Normal	FR	NA	NA	Rectum	Adenoma	Positive	NA
PRJEB6070	CCIS41806458ST.4.0	59	middle-age	F	non	non	FR	NA	NA	LC	Adenoma	Positive	NA
PRJEB6070	CCIS14449628ST.4.0	59	middle-age	F	20	Normal	FR	III	T4N1M0	RC	CRC	Negative	NA
PRJEB6070	CCIS81887263ST.4.0	59	middle-age	M	27	Fat	FR	I	T2N0M0	Rectum	CRC	Positive	NA
PRJEB6070	CCIS21126322ST.4.0	59	middle-age	M	25	Fat	FR	NA	NA	NA	CTR	Negative	NA
PRJEB6070	CCIS64785924ST.20.0	59	middle-age	F	25	Fat	FR	NA	NA	NA	CTR	Negative	NA
PRJEB6070	CCIS94417875ST.3.0	59	middle-age	F	28	Fat	FR	NA	NA	NA	CTR	Negative	NA
PRJEB6070	CCIS25399172ST.4.0	60	old	M	27	Fat	FR	NA	NA	LC	Adenoma	Negative	NA
PRJEB6070	CCIS50561855ST.4.0	60	old	F	26	Fat	FR	NA	NA	LC/RC	Adenoma	Negative	NA
PRJEB6070	CCIS83574003ST.4.0	60	old	M	24	Normal	FR	NA	NA	LC	Adenoma	Positive	NA
PRJEB6070	CCIS22958137ST.20.0	60	old	M	26	Fat	FR	IV	T4N1M1	LC	CRC	Positive	NA
PRJEB6070	CCIS80834637ST.4.0	60	old	F	28	Fat	FR	NA	NA	NA	CTR	Negative	NA
PRJEB6070	CCIS03857607ST.4.0	61	old	M	23	Normal	FR	NA	NA	NA	CTR	Negative	NA
PRJEB6070	CCIS16383318ST.4.0	61	old	F	24	Normal	FR	NA	NA	NA	CTR	Negative	NA
PRJEB6070	CCIS50471204ST.4.0	61	old	F	23	Normal	FR	NA	NA	NA	CTR	Negative	NA
PRJEB6070	CCIS63448910ST.4.0	61	old	F	34	Obese	FR	NA	NA	NA	CTR	Negative	NA
PRJEB6070	CCIS22275061ST.4.0	62	old	M	29	Fat	FR	NA	NA	Rectum	Adenoma	Negative	NA
PRJEB6070	CCIS35092938ST.4.0	62	old	F	21	Normal	FR	NA	NA	RC	Adenoma	Negative	NA
PRJEB6070	CCIS11015875ST.4.0	62	old	M	26	Fat	FR	III	T3N1M0	Rectum	CRC	Positive	NA
PRJEB6070	CCIS48725289ST.4.0	62	old	F	21	Normal	FR	I	T1N0M0	Sigma	CRC	Positive	NA
PRJEB6070	CCIS07648107ST.4.0	62	old	F	21	Normal	FR	NA	NA	NA	CTR	Negative	NA
PRJEB6070	CCIS23164343ST.4.0	62	old	M	23	Normal	FR	NA	NA	NA	CTR	Negative	NA
PRJEB6070	CCIS44093303ST.4.0	62	old	F	20	Normal	FR	NA	NA	NA	CTR	Positive	NA
PRJEB6070	CCIS74239020ST.4.0	62	old	M	24	Normal	FR	NA	NA	NA	CTR	Negative	NA
PRJEB6070	CCIS08668806ST.3.0	63	old	M	26	Fat	FR	NA	NA	LC	Adenoma	Negative	NA
PRJEB6070	CCIS47745468ST.4.0	63	old	M	27	Fat	FR	NA	NA	LC	Adenoma	Negative	NA
PRJEB6070	CCIS51667829ST.4.0	63	old	M	26	Fat	FR	NA	NA	RC	Adenoma	Negative	NA
PRJEB6070	CCIS90443472ST.4.0	63	old	M	30	Obese	FR	NA	NA	LC	Adenoma	Negative	NA
PRJEB6070	CCIS21278152ST.4.0	63	old	M	25	Fat	FR	II	T3N0M0	Sigma	CRC	Positive	NA
PRJEB6070	CCIS85214191ST.3.0	63	old	M	22	Normal	FR	IV	T3N1M1	RC	CRC	Positive	NA
PRJEB6070	CCIS91228662ST.4.0	63	old	M	31	Obese	FR	I	T1N0M0	LC	CRC	Negative	NA
PRJEB6070	CCIS98512455ST.4.0	63	old	M	29	Fat	FR	IV	T4N1M1	RC	CRC	Negative	NA
PRJEB6070	CCIS07277498ST.4.0	63	old	M	non	non	FR	NA	NA	NA	CTR	NA	NA
PRJEB6070	CCIS34604008ST.4.0	63	old	F	27	Fat	FR	NA	NA	NA	CTR	Negative	NA
PRJEB6070	CCIS36797902ST.4.0	63	old	M	25	Fat	FR	NA	NA	NA	CTR	Negative	NA
PRJEB6070	CCIS51595129ST.4.0	63	old	F	22	Normal	FR	NA	NA	NA	CTR	Negative	NA
PRJEB6070	CCIS64773582ST.4.0	63	old	F	23	Normal	FR	NA	NA	NA	CTR	Negative	NA
PRJEB6070	CCIS95409808ST.4.0	63	old	F	21	Normal	FR	NA	NA	NA	CTR	Negative	NA
PRJEB6070	CCIS10793554ST.4.0	64	old	M	26	Fat	FR	NA	NA	RC	Adenoma	Negative	NA
PRJEB6070	CCIS52234160ST.4.0	64	old	M	28	Fat	FR	NA	NA	RC	Adenoma	Negative	NA
PRJEB6070	CCIS94496512ST.4.0	64	old	M	28	Fat	FR	NA	NA	Rectum	Adenoma	Negative	NA
PRJEB6070	CCIS33816588ST.4.0	64	old	M	21	Normal	FR	III	T3N1M0	LC	CRC	Positive	NA
PRJEB6070	CCIS55230578ST.4.0	64	old	M	30	Obese	FR	IV	T3N1M1	RC	CRC	Negative	NA
PRJEB6070	CCIS29210128ST.4.0	64	old	M	27	Fat	FR	NA	NA	NA	CTR	Negative	NA
PRJEB6070	CCIS78100604ST.4.0	64	old	F	30	Obese	FR	NA	NA	NA	CTR	Negative	NA
PRJEB6070	CCIS81139242ST.4.0	64	old	F	20	Normal	FR	NA	NA	NA	CTR	Negative	NA
PRJEB6070	CCIS46047672ST.4.0	65	old	M	24	Normal	FR	IV	T4N0M1	LC	CRC	Negative	NA
PRJEB6070	CCIS77252613ST.4.0	65	old	M	26	Fat	FR	I	T1N0M0	LC	CRC	Positive	NA
PRJEB6070	CCIS05314658ST.4.0	65	old	F	24	Normal	FR	NA	NA	NA	CTR	Negative	NA
PRJEB6070	CCIS79210440ST.3.0	65	old	M	30	Obese	FR	NA	NA	NA	CTR	Positive	NA
PRJEB6070	CCIS93040568ST.20.0	65	old	M	30	Obese	FR	NA	NA	NA	CTR	Negative	NA
PRJEB6070	CCIS31434951ST.20.0	66	old	M	24	Normal	FR	NA	NA	LC	Adenoma	Negative	NA
PRJEB6070	CCIS44743950ST.4.0	66	old	M	22	Normal	FR	NA	NA	RC	Adenoma	Negative	NA
PRJEB6070	CCIS74726977ST.3.0	66	old	M	24	Normal	FR	NA	NA	LC/RC	Adenoma	Negative	NA
PRJEB6070	CCIS83445808ST.4.0	66	old	M	29	Fat	FR	NA	NA	Sigma	Adenoma	Negative	NA
PRJEB6070	CCIS96387239ST.4.0	66	old	M	20	Normal	FR	NA	NA	LC	Adenoma	Negative	NA
PRJEB6070	CCIS48174381ST.4.0	66	old	M	25	Fat	FR	NA	NA	NA	CTR	Negative	NA
PRJEB6070	CCIS50003399ST.4.0	66	old	F	28	Fat	FR	NA	NA	NA	CTR	Negative	NA
PRJEB6070	CCIS02379307ST.4.0	67	old	M	28	Fat	FR	I	T1N0M0	RC	CRC	Positive	NA
PRJEB6070	CCIS47284573ST.4.0	67	old	M	25	Fat	FR	III	T4N1M0	Rectum	CRC	Positive	NA
PRJEB6070	CCIS09568613ST.4.0	67	old	M	21	Normal	FR	NA	NA	NA	CTR	Negative	NA
PRJEB6070	CCIS11354283ST.4.0	67	old	M	27	Fat	FR	NA	NA	NA	CTR	Negative	NA
PRJEB6070	CCIS41692898ST.4.0	67	old	F	28	Fat	FR	NA	NA	NA	CTR	Negative	NA
PRJEB6070	CCIS45793747ST.4.0	67	old	M	25	Fat	FR	NA	NA	NA	CTR	Negative	NA
PRJEB6070	CCIS88007743ST.4.0	67	old	F	23	Normal	FR	NA	NA	NA	CTR	Negative	NA
PRJEB6070	CCIS19142497ST.3.0	68	old	M	23	Normal	FR	NA	NA	LC/RC	Adenoma	Negative	NA
PRJEB6070	CCIS56503244ST.3.0	68	old	M	21	Normal	FR	NA	NA	RC	Adenoma	Negative	NA
PRJEB6070	CCIS76563044ST.4.0	68	old	M	36	Obese	FR	NA	NA	RC	Adenoma	Negative	NA
PRJEB6070	CCIS81735969ST.20.0	68	old	M	26	Fat	FR	NA	NA	RC	Adenoma	Negative	NA
PRJEB6070	CCIS62794166ST.4.0	68	old	M	23	Normal	FR	IV	T3N1M1	LC	CRC	Negative	NA
PRJEB6070	CCIS32452666ST.4.0	68	old	M	26	Fat	FR	NA	NA	NA	CTR	Negative	NA
PRJEB6070	CCIS36699628ST.4.0	68	old	F	25	Fat	FR	NA	NA	NA	CTR	Negative	NA
PRJEB6070	CCIS24254057ST.4.0	69	old	F	24	Normal	FR	IV	T4N1M1	RC	CRC	Negative	NA
PRJEB6070	CCIS65479369ST.4.0	69	old	F	25	Fat	FR	IV	T3N1M1	RC	CRC	Positive	NA
PRJEB6070	CCIS78318719ST.4.0	69	old	F	30	Obese	FR	II	T3N0M0	RC	CRC	Negative	NA
PRJEB6070	CCIS63468405ST.4.0	69	old	F	25	Fat	FR	NA	NA	NA	CTR	Negative	NA
PRJEB6070	CCIS58234805ST.4.0	70	old	F	26	Fat	FR	III	T3N1M0	LC	CRC	Positive	NA
PRJEB6070	CCIS13047523ST.4.0	70	old	M	22	Normal	FR	NA	NA	NA	CTR	Negative	NA
PRJEB6070	CCIS71578391ST.4.0	70	old	M	25	Fat	FR	NA	NA	NA	CTR	Negative	NA
PRJEB6070	CCIS87290971ST.4.0	71	old	M	29	Fat	FR	NA	NA	RC	Adenoma	Negative	NA
PRJEB6070	CCIS90903952ST.3.0	71	old	F	22	Normal	FR	NA	NA	LC/RC	Adenoma	Negative	NA
PRJEB6070	CCIS20795251ST.4.0	71	old	F	23	Normal	FR	NA	NA	NA	CTR	Negative	NA
PRJEB6070	CCIS48507077ST.4.0	72	old	F	32	Obese	FR	NA	NA	Sigma	Adenoma	Negative	NA
PRJEB6070	CCIS17669415ST.4.0	72	old	F	37	Obese	FR	I	T1N0M0	LC	CRC	Negative	NA
PRJEB6070	CCIS53043478ST.4.0	72	old	M	22	Normal	FR	IV	T3N1M1	LC	CRC	Positive	NA
PRJEB6070	CCIS00146684ST.4.0	72	old	F	25	Fat	FR	NA	NA	NA	CTR	Negative	NA
PRJEB6070	CCIS27927933ST.4.0	72	old	M	24	Normal	FR	NA	NA	NA	CTR	Negative	NA
PRJEB6070	CCIS77100899ST.4.0	73	old	M	26	Fat	FR	NA	NA	LC	Adenoma	Negative	NA
PRJEB6070	CCIS35100175ST.4.0	73	old	M	40	Obese	FR	I	T1N0M0	LC	CRC	Negative	NA
PRJEB6070	CCIS41222843ST.4.0	73	old	F	24	Normal	FR	III	T3N1M0	LC	CRC	Negative	NA
PRJEB6070	CCIS87252800ST.4.0	73	old	M	17	Normal	FR	I	T2N0M0	Sigma	CRC	Negative	NA
PRJEB6070	CCIS87605453ST.4.0	73	old	F	26	Fat	FR	II	T3N0M0	RC	CRC	Positive	NA
PRJEB6070	CCIS41288781ST.4.0	74	old	F	19	Normal	FR	II	T3N0M0	RC	CRC	Negative	NA
PRJEB6070	CCIS72607085ST.4.0	74	old	F	26	Fat	FR	IV	T3NxM1	LC	CRC	Negative	NA
PRJEB6070	CCIS02856720ST.4.0	74	old	M	27	Fat	FR	NA	NA	NA	CTR	Positive	NA
PRJEB6070	CCIS88317640ST.4.0	74	old	M	27	Fat	FR	NA	NA	NA	CTR	Negative	NA
PRJEB6070	CCIS44757994ST.4.0	75	old	M	37	Obese	FR	III	T3N1M0	LC	CRC	Negative	NA
PRJEB6070	CCIS59903910ST.4.0	76	old	F	34	Obese	FR	NA	NA	RC	Adenoma	Negative	NA
PRJEB6070	CCIS53355328ST.4.0	76	old	M	non	non	FR	I	T2N0M0	LC	CRC	Positive	NA
PRJEB6070	CCIS61287323ST.4.0	76	old	M	25	Fat	FR	II	T3N0M0	Rectum	CRC	Positive	NA
PRJEB6070	CCIS22906510ST.20.0	77	old	M	23	Normal	FR	NA	NA	Sigma	Adenoma	Positive	NA
PRJEB6070	CCIS07539127ST.4.0	77	old	F	22	Normal	FR	NA	NA	NA	CTR	Negative	NA
PRJEB6070	CCIS90166425ST.4.0	78	old	F	23	Normal	FR	NA	NA	LC	Adenoma	Negative	NA
PRJEB6070	CCIS41548810ST.4.0	78	old	M	19	Normal	FR	IV	T3N0M1	LC	CRC	Positive	NA
PRJEB6070	CCIS38765456ST.20.0	79	old	F	22	Normal	FR	IV	T4N1M1	LC	CRC	Positive	NA
PRJEB6070	CCIS87167916ST.4.0	79	old	M	30	Obese	FR	IV	T4N1M1	Rectum	CRC	Positive	NA
PRJEB6070	CCIS34055159ST.4.0	80	old	M	29	Fat	FR	I	T2N0M0	LC	CRC	Positive	NA
PRJEB6070	CCIS59132091ST.4.0	80	old	F	23	Normal	FR	I	T1N0M0	LC	CRC	Negative	NA
PRJEB6070	CCIS94603952ST.4.0	80	old	F	21	Normal	FR	NA	NA	NA	CTR	Negative	NA
PRJEB6070	CCIS12370844ST.4.0	81	old	F	39	Obese	FR	I	T2N0M0	Rectum	CRC	Positive	NA
PRJEB6070	CCIS22416007ST.4.0	82	old	M	24	Normal	FR	IV	T4N1M1	LC	CRC	Negative	NA
PRJEB6070	CCIS90164298ST.4.0	84	old	M	23	Normal	FR	NA	NA	NA	CTR	Negative	NA
PRJEB6070	CCIS87116798ST.4.0	85	old	F	20	Normal	FR	IV	T3N1M1	LC	CRC	Negative	NA
PRJEB6070	CCIS40244499ST.3.0	87	old	F	32	Obese	FR	II	T4N0M0	RC	CRC	Negative	NA
PRJEB6070	CCIS50148151ST.4.0	87	old	F	15	Normal	FR	III	T2N1M0	RC	CRC	Negative	NA
PRJEB6070	CCIS28384594ST.4.0	89	old	M	24	Normal	FR	NA	NA	LC	Adenoma	Negative	NA
PRJEB7774	X31883	43	middle-age	M	22.68	Normal	AUS	II	T3N0M0	Rectum	CRC	NA	0
PRJEB7774	X532915	43	middle-age	F	22.65	Normal	AUS	NA	NA	NA	CTR	NA	0
PRJEB7774	X531469	45	middle-age	F	22.15	Normal	AUS	I	T2N0M0	Rectum	CRC	NA	0
PRJEB7774	X31872	46	middle-age	M	30.86	Obese	AUS	0	pTis	distal	CRC	NA	1
PRJEB7774	X531414	46	middle-age	M	23.15	Normal	AUS	NA	NA	NA	CTR	NA	0
PRJEB7774	X531424	46	middle-age	M	28.74	Fat	AUS	NA	NA	NA	CTR	NA	1
PRJEB7774	X530373	47	middle-age	F	25.78	Fat	AUS	I	T2N0M0	Rectum	CRC	NA	0
PRJEB7774	X530450	48	middle-age	M	25.61	Fat	AUS	NA	NA	Rectum	Adenoma	NA	0
PRJEB7774	X530185	52	middle-age	F	32.8	Obese	AUS	NA	NA	right	Adenoma	NA	0
PRJEB7774	X31878	52	middle-age	F	27.14	Fat	AUS	III	T3N1M0	Rectum	CRC	NA	0
PRJEB7774	X531128	52	middle-age	M	25.73	Fat	AUS	III	T3N1M0	Rectum	CRC	NA	0
PRJEB7774	X31884	54	middle-age	M	27.34	Fat	AUS	0	pTis	Rectum	CRC	NA	0
PRJEB7774	X31865	55	middle-age	F	23.34	Normal	AUS	I	T2N0M0	Rectum	CRC	NA	0
PRJEB7774	X532749	55	middle-age	M	27.76	Fat	AUS	NA	NA	NA	CTR	NA	1
PRJEB7774	X530018	56	middle-age	M	29.41	Fat	AUS	NA	NA	right	Adenoma	NA	0
PRJEB7774	X530558	56	middle-age	F	22.8	Normal	AUS	NA	NA	Rectum	Adenoma	NA	0
PRJEB7774	X532305	56	middle-age	F	43.58	Obese	AUS	NA	NA	NA	Adenoma	NA	0
PRJEB7774	X31876	56	middle-age	F	20.07	Normal	AUS	III	T3N2M0	Rectum	CRC	NA	0
PRJEB7774	X530348	58	middle-age	M	21.7	Normal	AUS	NA	NA	Rectum	Adenoma	NA	0
PRJEB7774	X530867	58	middle-age	M	27.02	Fat	AUS	NA	NA	right	Adenoma	NA	0
PRJEB7774	X31875	58	middle-age	M	27.76	Fat	AUS	I	T2N0M0	Rectum	CRC	NA	0
PRJEB7774	X531403	59	middle-age	F	29.2	Fat	AUS	NA	NA	left	Adenoma	NA	0
PRJEB7774	X530002	60	old	F	30	Obese	AUS	NA	NA	right	Adenoma	NA	0
PRJEB7774	X31489	60	old	M	26.64	Fat	AUS	I	T2N0M0	Rectum	CRC	NA	0
PRJEB7774	X31881	60	old	F	30.08	Obese	AUS	III	T4N1M0	Rectum	CRC	NA	0
PRJEB7774	X31021	60	old	F	22.1	Normal	AUS	NA	NA	NA	CTR	NA	0
PRJEB7774	X530142	61	old	F	22.8	Normal	AUS	NA	NA	left	Adenoma	NA	0
PRJEB7774	X31233	62	old	M	26.88	Fat	AUS	NA	NA	left	Adenoma	NA	0
PRJEB7774	X31275	62	old	M	30.1	Obese	AUS	NA	NA	right	Adenoma	NA	0
PRJEB7774	X31337	62	old	M	35.43	Obese	AUS	NA	NA	left	Adenoma	NA	0
PRJEB7774	X530168	62	old	F	32.8	Obese	AUS	NA	NA	right	Adenoma	NA	0
PRJEB7774	X530623	62	old	M	24.3	Normal	AUS	NA	NA	Rectum	Adenoma	NA	0
PRJEB7774	X530444	62	old	F	22.1	Normal	AUS	NA	NA	NA	CTR	NA	0
PRJEB7774	X530451	62	old	M	29.8	Fat	AUS	NA	NA	NA	CTR	NA	0
PRJEB7774	X31282	63	old	M	34.08	Obese	AUS	NA	NA	Rectum	Adenoma	NA	0
PRJEB7774	X31449	63	old	M	30.77	Obese	AUS	NA	NA	left	Adenoma	NA	0
PRJEB7774	X530172	63	old	M	27.4	Fat	AUS	NA	NA	Rectum	Adenoma	NA	0
PRJEB7774	X530697	63	old	F	30.47	Obese	AUS	NA	NA	left	Adenoma	NA	1
PRJEB7774	X531663	63	old	M	25.65	Fat	AUS	NA	NA	NA	Adenoma	NA	0
PRJEB7774	X31870	63	old	M	25.88	Fat	AUS	I	T1N0M0	distal	CRC	NA	0
PRJEB7774	X531416	63	old	M	33.56	Obese	AUS	I	T2N0M0	Rectum	CRC	NA	1
PRJEB7774	X31328	63	old	M	30.9	Obese	AUS	NA	NA	NA	CTR	NA	1
PRJEB7774	X31379	63	old	M	30.4	Obese	AUS	NA	NA	NA	CTR	NA	1
PRJEB7774	X530075	63	old	M	34.14	Obese	AUS	NA	NA	NA	CTR	NA	0
PRJEB7774	X530163	63	old	M	30.4	Obese	AUS	NA	NA	NA	CTR	NA	1
PRJEB7774	X530364	63	old	M	31.17	Obese	AUS	NA	NA	NA	CTR	NA	0
PRJEB7774	X530054	64	old	F	20.52	Normal	AUS	NA	NA	left	Adenoma	NA	0
PRJEB7774	X530262	64	old	M	29.3	Fat	AUS	NA	NA	left	Adenoma	NA	0
PRJEB7774	X31004	64	old	M	29.35	Fat	AUS	I	T1N0M0	Rectum	CRC	NA	0
PRJEB7774	X31868	64	old	F	24.09	Normal	AUS	I	T2N0M0	Rectum	CRC	NA	0
PRJEB7774	X531277	64	old	M	29.07	Fat	AUS	I	T1N0M0	Rectum	CRC	NA	0
PRJEB7774	X31512	64	old	M	29.3	Fat	AUS	NA	NA	NA	CTR	NA	0
PRJEB7774	X530052	64	old	M	29.38	Fat	AUS	NA	NA	NA	CTR	NA	0
PRJEB7774	X530055	64	old	M	22.78	Normal	AUS	NA	NA	NA	CTR	NA	0
PRJEB7774	X31188	65	old	M	28.03	Fat	AUS	NA	NA	Rectum	CRC	NA	0
PRJEB7774	X31223	65	old	F	23.31	Normal	AUS	II	T4N0M0	Rectum	CRC	NA	0
PRJEB7774	X531382	65	old	M	29.74	Fat	AUS	II	T3N0M0	Rectum	CRC	NA	0
PRJEB7774	X31236	65	old	M	29.06	Fat	AUS	NA	NA	NA	CTR	NA	0
PRJEB7774	X31519	65	old	M	28.9	Fat	AUS	NA	NA	NA	CTR	NA	0
PRJEB7774	X530215	65	old	M	31.22	Obese	AUS	NA	NA	NA	CTR	NA	1
PRJEB7774	X530258	65	old	M	22.03	Normal	AUS	NA	NA	NA	CTR	NA	0
PRJEB7774	X530743	66	old	F	22.65	Normal	AUS	NA	NA	Rectum	Adenoma	NA	0
PRJEB7774	X531352	66	old	M	22.6	Normal	AUS	I	T1N0M0	distal	CRC	NA	0
PRJEB7774	X31112	66	old	M	30.3	Obese	AUS	NA	NA	NA	CTR	NA	0
PRJEB7774	X31452	66	old	F	21.7	Normal	AUS	NA	NA	NA	CTR	NA	0
PRJEB7774	X31637	66	old	M	29.98	Fat	AUS	NA	NA	NA	CTR	NA	0
PRJEB7774	X31711	66	old	M	30.02	Obese	AUS	NA	NA	NA	CTR	NA	0
PRJEB7774	X31750	66	old	M	34.04	Obese	AUS	NA	NA	NA	CTR	NA	0
PRJEB7774	X31137	67	old	M	27.14	Fat	AUS	NA	NA	right	Adenoma	NA	0
PRJEB7774	X530028	67	old	M	33.23	Obese	AUS	NA	NA	right	Adenoma	NA	0
PRJEB7774	X530039	67	old	M	28.34	Fat	AUS	NA	NA	left	Adenoma	NA	1
PRJEB7774	X31237	67	old	M	29.4	Fat	AUS	II	T3N0M0	proximal	CRC	NA	0
PRJEB7774	X31160	67	old	F	30	Obese	AUS	NA	NA	NA	CTR	NA	0
PRJEB7774	X31267	67	old	M	22.79	Normal	AUS	NA	NA	NA	CTR	NA	0
PRJEB7774	X31450	67	old	M	23.14	Normal	AUS	NA	NA	NA	CTR	NA	0
PRJEB7774	X530394	67	old	F	22.58	Normal	AUS	NA	NA	NA	CTR	NA	0
PRJEB7774	X31398	68	old	F	34.01	Obese	AUS	NA	NA	right	Adenoma	NA	0
PRJEB7774	X31424	68	old	F	24.84	Normal	AUS	NA	NA	right	Adenoma	NA	1
PRJEB7774	X532832	68	old	F	27.55	Fat	AUS	NA	NA	NA	Adenoma	NA	0
PRJEB7774	X31493	68	old	M	32.25	Obese	AUS	0	pTis	Rectum	CRC	NA	0
PRJEB7774	X31009	68	old	M	32	Obese	AUS	NA	NA	NA	CTR	NA	0
PRJEB7774	X31071	68	old	M	23.45	Normal	AUS	NA	NA	NA	CTR	NA	0
PRJEB7774	X31300	68	old	F	21.7	Normal	AUS	NA	NA	NA	CTR	NA	0
PRJEB7774	X31333	68	old	M	22.2	Normal	AUS	NA	NA	NA	CTR	NA	0
PRJEB7774	X530074	68	old	F	22.1	Normal	AUS	NA	NA	NA	CTR	NA	0
PRJEB7774	X530227	68	old	F	22.4	Normal	AUS	NA	NA	NA	CTR	NA	0
PRJEB7774	X532802	68	old	M	23.53	Normal	AUS	NA	NA	NA	CTR	NA	0
PRJEB7774	X31256	69	old	F	24.13	Normal	AUS	NA	NA	left	Adenoma	NA	0
PRJEB7774	X31501	69	old	F	24.4	Normal	AUS	NA	NA	right	Adenoma	NA	0
PRJEB7774	X530041	69	old	M	21.46	Normal	AUS	NA	NA	left	Adenoma	NA	0
PRJEB7774	X531333	69	old	M	29.94	Fat	AUS	III	T3N1M0	distal	CRC	NA	0
PRJEB7774	X31428	69	old	F	30	Obese	AUS	NA	NA	NA	CTR	NA	0
PRJEB7774	X31714	69	old	F	28.3	Fat	AUS	NA	NA	NA	CTR	NA	1
PRJEB7774	X31723	69	old	F	22.4	Normal	AUS	NA	NA	NA	CTR	NA	0
PRJEB7774	X31030	70	old	M	34.11	Obese	AUS	NA	NA	Rectum	Adenoma	NA	0
PRJEB7774	X530600	70	old	F	25.2	Fat	AUS	NA	NA	right	Adenoma	NA	0
PRJEB7774	X530756	70	old	F	29.38	Fat	AUS	NA	NA	left	Adenoma	NA	1
PRJEB7774	X31232	70	old	M	22.64	Normal	AUS	NA	NA	NA	CTR	NA	0
PRJEB7774	X31537	70	old	F	31	Obese	AUS	NA	NA	NA	CTR	NA	0
PRJEB7774	X31600	70	old	F	30	Obese	AUS	NA	NA	NA	CTR	NA	0
PRJEB7774	X31749	70	old	M	31.25	Obese	AUS	NA	NA	NA	CTR	NA	0
PRJEB7774	X530119	70	old	M	31.6	Obese	AUS	NA	NA	NA	CTR	NA	1
PRJEB7774	X530295	70	old	F	22.67	Normal	AUS	NA	NA	NA	CTR	NA	0
PRJEB7774	X530331	70	old	M	23.67	Normal	AUS	NA	NA	NA	CTR	NA	0
PRJEB7774	X530368	70	old	F	22.8	Normal	AUS	NA	NA	NA	CTR	NA	0
PRJEB7774	X532779	70	old	M	28.72	Fat	AUS	NA	NA	NA	CTR	NA	0
PRJEB7774	X31431	71	old	M	27.04	Fat	AUS	NA	NA	left	Adenoma	NA	1
PRJEB7774	X530323	71	old	M	24.8	Normal	AUS	NA	NA	Rectum	Adenoma	NA	0
PRJEB7774	X31879	71	old	M	29.74	Fat	AUS	III	T4N2M0	Rectum	CRC	NA	0
PRJEB7774	X31360	71	old	M	29.04	Fat	AUS	NA	NA	NA	CTR	NA	0
PRJEB7774	X530050	71	old	F	29	Fat	AUS	NA	NA	NA	CTR	NA	0
PRJEB7774	X530177	71	old	F	29	Fat	AUS	NA	NA	NA	CTR	NA	0
PRJEB7774	X31455	72	old	F	27.43	Fat	AUS	NA	NA	Rectum	Adenoma	NA	0
PRJEB7774	X31871	72	old	M	28.41	Fat	AUS	I	T2N0M0	distal	CRC	NA	0
PRJEB7774	X31877	72	old	F	26.67	Fat	AUS	III	T3N1M0	Rectum	CRC	NA	0
PRJEB7774	X531155	72	old	F	24.22	Normal	AUS	I	T1N0M0	proximal	CRC	NA	0
PRJEB7774	X531281	72	old	F	27.12	Fat	AUS	0	pTis	distal	CRC	NA	0
PRJEB7774	X531361	72	old	F	23.83	Normal	AUS	III	T4N1M0	Rectum	CRC	NA	0
PRJEB7774	X531766	72	old	M	24.34	Normal	AUS	I	T2N0M0	proximal	CRC	NA	1
PRJEB7774	X31343	72	old	M	29.03	Fat	AUS	NA	NA	NA	CTR	NA	1
PRJEB7774	X31416	72	old	M	31.8	Obese	AUS	NA	NA	NA	CTR	NA	1
PRJEB7774	X31700	72	old	F	28.7	Fat	AUS	NA	NA	NA	CTR	NA	1
PRJEB7774	X530167	72	old	F	30	Obese	AUS	NA	NA	NA	CTR	NA	0
PRJEB7774	X530251	72	old	M	31.8	Obese	AUS	NA	NA	NA	CTR	NA	0
PRJEB7774	X31159	73	old	M	17.99	Normal	AUS	II	T3N0M0	Rectum	CRC	NA	0
PRJEB7774	X31866	73	old	F	29.75	Fat	AUS	II	T3N0M0	distal	CRC	NA	0
PRJEB7774	X31873	73	old	M	24.82	Normal	AUS	II	T3N0M0	Rectum	CRC	NA	0
PRJEB7774	X31129	73	old	M	29.7	Fat	AUS	NA	NA	NA	CTR	NA	1
PRJEB7774	X31766	73	old	F	32	Obese	AUS	NA	NA	NA	CTR	NA	0
PRJEB7774	X532796	73	old	F	26.56	Fat	AUS	NA	NA	NA	CTR	NA	0
PRJEB7774	X530840	74	old	F	24.13	Normal	AUS	NA	NA	right	Adenoma	NA	0
PRJEB7774	X31685	74	old	M	26.37	Fat	AUS	I	T1N0M0	distal	CRC	NA	0
PRJEB7774	X31874	74	old	F	29.17	Fat	AUS	IV	T4N1M1	distal	CRC	NA	1
PRJEB7774	X31880	74	old	M	24.34	Normal	AUS	III	T4N2M0	proximal	CRC	NA	1
PRJEB7774	X31219	74	old	F	28.3	Fat	AUS	NA	NA	NA	CTR	NA	0
PRJEB7774	X31557	74	old	F	28.5	Fat	AUS	NA	NA	NA	CTR	NA	0
PRJEB7774	X530154	74	old	F	28.5	Fat	AUS	NA	NA	NA	CTR	NA	0
PRJEB7774	X530403	75	old	F	30.12	Obese	AUS	NA	NA	right	Adenoma	NA	0
PRJEB7774	X530315	75	old	F	31	Obese	AUS	NA	NA	NA	CTR	NA	0
PRJEB7774	X31582	77	old	M	25.7	Fat	AUS	NA	NA	Rectum	Adenoma	NA	0
PRJEB7774	X530705	77	old	M	37.56	Obese	AUS	NA	NA	Rectum	Adenoma	NA	0
PRJEB7774	X530890	77	old	M	29.41	Fat	AUS	0	pTis	Rectum	CRC	NA	0
PRJEB7774	X531274	77	old	M	19.16	Normal	AUS	III	T3N2M0	Rectum	CRC	NA	0
PRJEB7774	X531775	77	old	F	23.5	Normal	AUS	II	T3N0M0	proximal	CRC	NA	0
PRJEB7774	X31477	78	old	F	31.24	Obese	AUS	NA	NA	Rectum	Adenoma	NA	0
PRJEB7774	X530297	78	old	F	24	Normal	AUS	NA	NA	Rectum	Adenoma	NA	0
PRJEB7774	X532826	78	old	M	31.22	Obese	AUS	NA	NA	NA	CTR	NA	1
PRJEB7774	X531248	79	old	M	26.3	Fat	AUS	III	T3N1M0	distal	CRC	NA	0
PRJEB7774	X530398	80	old	M	26.47	Fat	AUS	NA	NA	left	Adenoma	NA	0
PRJEB7774	X31276	82	old	M	30.47	Obese	AUS	0	pTis	proximal	CRC	NA	0
PRJEB7774	X530026	83	old	F	21.94	Normal	AUS	NA	NA	left	Adenoma	NA	0
PRJEB7774	X31705	84	old	F	24.7	Normal	AUS	NA	NA	Rectum	Adenoma	NA	0
PRJEB7774	X31285	84	old	M	27.28	Fat	AUS	II	T3N0M0	Rectum	CRC	NA	1
PRJEB7774	X31446	84	old	F	31.22	Obese	AUS	0	pTis	proximal	CRC	NA	0
PRJEB7774	X31549	84	old	F	27.77	Fat	AUS	I	T1N0M0	distal	CRC	NA	0
PRJEB7774	X31367	86	old	F	20.5	Normal	AUS	I	T2N0M0	proximal	CRC	NA	0
PRJNA389927	SAMN07211179	35	young	F	35.5	Obese	USA	NA	NA	NA	CTR	negative	NA
PRJNA389927	SAMN07211207	37	young	M	24.38	Normal	Canada	NA	NA	NA	Adenoma	negative	NA
PRJNA389927	SAMN07211147	37	young	M	35.11	Obese	USA	NA	NA	NA	CRC	Positive	NA
PRJNA389927	SAMN07211194	42	middle-age	M	27.72	Fat	USA	NA	NA	NA	CTR	negative	NA
PRJNA389927	SAMN07211158	43	middle-age	M	23.88	Normal	USA	NA	NA	NA	CRC	Negative	NA
PRJNA389927	SAMN07211166	43	middle-age	M	46.37	Obese	USA	NA	NA	NA	CRC	Negative	NA
PRJNA389927	SAMN07211174	44	middle-age	F	25.97	Fat	USA	NA	NA	NA	CTR	negative	NA
PRJNA389927	SAMN07211226	45	middle-age	F	31.63	Obese	Canada	NA	NA	NA	Adenoma	negative	NA
PRJNA389927	SAMN07211183	45	middle-age	F	33.15	Obese	USA	NA	NA	NA	CTR	negative	NA
PRJNA389927	SAMN07211196	46	middle-age	F	21.34	Normal	USA	NA	NA	NA	CTR	negative	NA
PRJNA389927	SAMN07211213	47	middle-age	M	27.83	Fat	Canada	NA	NA	NA	Adenoma	positive	NA
PRJNA389927	SAMN07211217	47	middle-age	F	24.22	Normal	USA	NA	NA	NA	Adenoma	negative	NA
PRJNA389927	SAMN07211152	47	middle-age	F	26.37	Fat	USA	NA	NA	NA	CRC	Negative	NA
PRJNA389927	SAMN07211164	48	middle-age	M	32.91	Obese	USA	NA	NA	NA	CRC	Positive	NA
PRJNA389927	SAMN07211155	49	middle-age	M	non	non	USA	NA	NA	NA	CRC	Positive	NA
PRJNA389927	SAMN07211195	49	middle-age	M	24.93	Normal	USA	NA	NA	NA	CTR	negative	NA
PRJNA389927	SAMN07211218	50	middle-age	F	23.83	Normal	Canada	NA	NA	NA	Adenoma	negative	NA
PRJNA389927	SAMN07211225	50	middle-age	M	31.67	Obese	Canada	NA	NA	NA	Adenoma	negative	NA
PRJNA389927	SAMN07211201	51	middle-age	M	28.09	Fat	USA	NA	NA	NA	Adenoma	negative	NA
PRJNA389927	SAMN07211150	51	middle-age	F	35.5	Obese	USA	NA	NA	NA	CRC	Negative	NA
PRJNA389927	SAMN07211162	51	middle-age	F	23.66	Normal	USA	NA	NA	NA	CRC	Negative	NA
PRJNA389927	SAMN07211180	51	middle-age	M	25.1	Fat	USA	NA	NA	NA	CTR	negative	NA
PRJNA389927	SAMN07211182	51	middle-age	F	30.42	Obese	USA	NA	NA	NA	CTR	negative	NA
PRJNA389927	SAMN07211185	51	middle-age	F	21.34	Normal	USA	NA	NA	NA	CTR	negative	NA
PRJNA389927	SAMN07211193	51	middle-age	M	21.11	Normal	USA	NA	NA	NA	CTR	negative	NA
PRJNA389927	SAMN07211197	51	middle-age	F	29.72	Fat	USA	NA	NA	NA	CTR	negative	NA
PRJNA389927	SAMN07211159	52	middle-age	M	28.7	Fat	USA	NA	NA	NA	CRC	Negative	NA
PRJNA389927	SAMN07211175	52	middle-age	F	20.57	Normal	USA	NA	NA	NA	CTR	negative	NA
PRJNA389927	SAMN07211177	52	middle-age	M	24.77	Normal	USA	NA	NA	NA	CTR	negative	NA
PRJNA389927	SAMN07211214	53	middle-age	M	28.73	Fat	Canada	NA	NA	NA	Adenoma	negative	NA
PRJNA389927	SAMN07211173	54	middle-age	M	31.6	Obese	USA	NA	NA	NA	CTR	negative	NA
PRJNA389927	SAMN07211188	54	middle-age	F	33.56	Obese	USA	NA	NA	NA	CTR	negative	NA
PRJNA389927	SAMN07211154	55	middle-age	M	57.46	Obese	USA	NA	NA	NA	CRC	Negative	NA
PRJNA389927	SAMN07211181	55	middle-age	F	37.78	Obese	USA	NA	NA	NA	CTR	negative	NA
PRJNA389927	SAMN07211215	56	middle-age	M	30.44	Obese	Canada	NA	NA	NA	Adenoma	negative	NA
PRJNA389927	SAMN07211149	56	middle-age	M	32.65	Obese	USA	NA	NA	NA	CRC	Positive	NA
PRJNA389927	SAMN07211192	56	middle-age	F	21.16	Normal	USA	NA	NA	NA	CTR	negative	NA
PRJNA389927	SAMN07211170	57	middle-age	M	34.48	Obese	Canada	NA	NA	NA	CRC	Positive	NA
PRJNA389927	SAMN07211186	57	middle-age	F	23.81	Normal	USA	NA	NA	NA	CTR	negative	NA
PRJNA389927	SAMN07211204	58	middle-age	M	39.51	Obese	USA	NA	NA	NA	Adenoma	positive	NA
PRJNA389927	SAMN07211161	58	middle-age	M	29.68	Fat	USA	NA	NA	NA	CRC	Negative	NA
PRJNA389927	SAMN07211191	58	middle-age	M	29.05	Fat	USA	NA	NA	NA	CTR	negative	NA
PRJNA389927	SAMN07211144	59	middle-age	M	28.73	Fat	USA	NA	NA	NA	CRC	Negative	NA
PRJNA389927	SAMN07211167	59	middle-age	F	29.75	Fat	USA	NA	NA	NA	CRC	Positive	NA
PRJNA389927	SAMN07211169	59	middle-age	M	23.08	Normal	USA	NA	NA	NA	CRC	Positive	NA
PRJNA389927	SAMN07211165	60	old	F	27.83	Fat	USA	NA	NA	NA	CRC	Negative	NA
PRJNA389927	SAMN07211200	61	old	F	26.12	Fat	USA	NA	NA	NA	Adenoma	negative	NA
PRJNA389927	SAMN07211216	61	old	F	21.34	Normal	Canada	NA	NA	NA	Adenoma	negative	NA
PRJNA389927	SAMN07211156	61	old	M	34.9	Obese	USA	NA	NA	NA	CRC	Positive	NA
PRJNA389927	SAMN07211184	61	old	F	20.75	Normal	USA	NA	NA	NA	CTR	negative	NA
PRJNA389927	SAMN07211190	61	old	M	24.82	Normal	USA	NA	NA	NA	CTR	negative	NA
PRJNA389927	SAMN07211210	62	old	M	28.41	Fat	Canada	NA	NA	NA	Adenoma	negative	NA
PRJNA389927	SAMN07211203	63	old	M	32.41	Obese	Canada	NA	NA	NA	Adenoma	negative	NA
PRJNA389927	SAMN07211222	63	old	F	27.34	Fat	Canada	NA	NA	NA	Adenoma	negative	NA
PRJNA389927	SAMN07211157	63	old	M	30.84	Obese	USA	NA	NA	NA	CRC	Positive	NA
PRJNA389927	SAMN07211198	63	old	F	32.81	Obese	USA	NA	NA	NA	CTR	negative	NA
PRJNA389927	SAMN07211202	64	old	M	21.6	Normal	USA	NA	NA	NA	Adenoma	negative	NA
PRJNA389927	SAMN07211212	64	old	M	27.77	Fat	Canada	NA	NA	NA	Adenoma	negative	NA
PRJNA389927	SAMN07211220	64	old	M	25.06	Fat	Canada	NA	NA	NA	Adenoma	negative	NA
PRJNA389927	SAMN07211163	64	old	F	24.38	Normal	USA	NA	NA	NA	CRC	Negative	NA
PRJNA389927	SAMN07211208	65	old	F	20.82	Normal	Canada	NA	NA	NA	Adenoma	positive	NA
PRJNA389927	SAMN07211171	65	old	F	21.51	Normal	Canada	NA	NA	NA	CTR	negative	NA
PRJNA389927	SAMN07211178	65	old	M	26.57	Fat	Canada	NA	NA	NA	CTR	negative	NA
PRJNA389927	SAMN07211187	65	old	M	33.06	Obese	USA	NA	NA	NA	CTR	negative	NA
PRJNA389927	SAMN07211221	67	old	F	25.56	Fat	Canada	NA	NA	NA	Adenoma	negative	NA
PRJNA389927	SAMN07211153	67	old	F	32.27	Obese	USA	NA	NA	NA	CRC	Negative	NA
PRJNA389927	SAMN07211219	68	old	F	31.59	Obese	Canada	NA	NA	NA	Adenoma	negative	NA
PRJNA389927	SAMN07211224	68	old	M	25.22	Fat	Canada	NA	NA	NA	Adenoma	negative	NA
PRJNA389927	SAMN07211145	69	old	M	27.76	Fat	USA	NA	NA	NA	CRC	Negative	NA
PRJNA389927	SAMN07211148	69	old	M	26.23	Fat	USA	NA	NA	NA	CRC	Negative	NA
PRJNA389927	SAMN07211151	69	old	M	26.7	Fat	USA	NA	NA	NA	CRC	Negative	NA
PRJNA389927	SAMN07211172	69	old	F	18.66	Normal	Canada	NA	NA	NA	CTR	negative	NA
PRJNA389927	SAMN07211143	70	old	M	23.31	Normal	USA	NA	NA	NA	CRC	Negative	NA
PRJNA389927	SAMN07211205	71	old	M	29.07	Fat	Canada	NA	NA	NA	Adenoma	negative	NA
PRJNA389927	SAMN07211160	71	old	M	32.32	Obese	USA	NA	NA	NA	CRC	Positive	NA
PRJNA389927	SAMN07211211	72	old	F	21.16	Normal	Canada	NA	NA	NA	Adenoma	negative	NA
PRJNA389927	SAMN07211206	73	old	M	25.61	Fat	Canada	NA	NA	NA	Adenoma	positive	NA
PRJNA389927	SAMN07211168	73	old	F	21.62	Normal	Canada	NA	NA	NA	CRC	Negative	NA
PRJNA389927	SAMN07211176	75	old	M	25.26	Fat	USA	NA	NA	NA	CTR	negative	NA
PRJNA389927	SAMN07211189	75	old	F	23.53	Normal	USA	NA	NA	NA	CTR	negative	NA
PRJNA389927	SAMN07211199	76	old	M	22.98	Normal	Canada	NA	NA	NA	Adenoma	negative	NA
PRJNA389927	SAMN07211223	80	old	F	28.72	Fat	Canada	NA	NA	NA	Adenoma	negative	NA
PRJNA389927	SAMN07211209	82	old	M	35.8	Obese	Canada	NA	NA	NA	Adenoma	negative	NA
PRJNA389927	SAMN07211146	88	old	M	26.3	Fat	USA	NA	NA	NA	CRC	Negative	NA
PRJNA447983	VF69	49	middle-age	M	21	Normal	ITA	NA	NA	NA	Adenoma	NA	NA
PRJNA447983	VF102	50	middle-age	M	26	Fat	ITA	NA	NA	NA	Adenoma	NA	NA
PRJNA447983	VF30	53	middle-age	F	21	Normal	ITA	NA	NA	NA	Adenoma	NA	NA
PRJNA447983	VF47	53	middle-age	F	23	Normal	ITA	NA	NA	NA	Adenoma	NA	NA
PRJNA447983	GF18	55	middle-age	M	19	Normal	ITA	NA	NA	NA	Adenoma	NA	NA
PRJNA447983	VF32	56	middle-age	F	30	Obese	ITA	NA	NA	NA	Adenoma	NA	NA
PRJNA447983	VF37	57	middle-age	M	29	Fat	ITA	NA	NA	NA	Adenoma	NA	NA
PRJNA447983	VF90	57	middle-age	M	29	Fat	ITA	NA	NA	NA	Adenoma	NA	NA
PRJNA447983	VF300	57	middle-age	M	30	Obese	ITA	NA	NA	NA	CRC	NA	NA
PRJNA447983	VF50	58	middle-age	M	23	Normal	ITA	NA	NA	NA	Adenoma	NA	NA
PRJNA447983	VF56	58	middle-age	M	26	Fat	ITA	NA	NA	NA	Adenoma	NA	NA
PRJNA447983	VF66	58	middle-age	F	25	Fat	ITA	NA	NA	NA	Adenoma	NA	NA
PRJNA447983	VF73	58	middle-age	M	25	Fat	ITA	NA	NA	NA	CRC	NA	NA
PRJNA447983	VF84	58	middle-age	M	24	Normal	ITA	NA	NA	NA	CTR	NA	NA
PRJNA447983	VF35	59	middle-age	M	22	Normal	ITA	NA	NA	NA	Adenoma	NA	NA
PRJNA447983	VF31	59	middle-age	M	26	Fat	ITA	NA	NA	NA	CTR	NA	NA
PRJNA447983	VF214	60	old	M	24	Normal	ITA	NA	NA	NA	Adenoma	NA	NA
PRJNA447983	VF270	60	old	M	22	Normal	ITA	NA	NA	NA	CRC	NA	NA
PRJNA447983	VF10	60	old	F	20	Normal	ITA	NA	NA	NA	CTR	NA	NA
PRJNA447983	VF43	60	old	M	22	Normal	ITA	NA	NA	NA	CTR	NA	NA
PRJNA447983	VF70	61	old	M	29	Fat	ITA	NA	NA	NA	Adenoma	NA	NA
PRJNA447983	VF234	61	old	M	23	Normal	ITA	NA	NA	NA	CRC	NA	NA
PRJNA447983	VF279	61	old	M	22	Normal	ITA	NA	NA	NA	CTR	NA	NA
PRJNA447983	VF82	61	old	F	non	non	ITA	NA	NA	NA	CTR	NA	NA
PRJNA447983	GF17	62	old	F	29	Fat	ITA	NA	NA	NA	Adenoma	NA	NA
PRJNA447983	VF60	63	old	F	21	Normal	ITA	NA	NA	NA	Adenoma	NA	NA
PRJNA447983	VF207	63	old	M	25	Fat	ITA	NA	NA	NA	CRC	NA	NA
PRJNA447983	VF120	63	old	M	37	Obese	ITA	NA	NA	NA	CRC	NA	NA
PRJNA447983	VF28	63	old	F	28	Fat	ITA	NA	NA	NA	CTR	NA	NA
PRJNA447983	VF07	64	old	F	25	Fat	ITA	NA	NA	NA	Adenoma	NA	NA
PRJNA447983	VF176	64	old	M	23	Normal	ITA	NA	NA	NA	CRC	NA	NA
PRJNA447983	VF100	64	old	M	30	Obese	ITA	NA	NA	NA	CRC	NA	NA
PRJNA447983	VF265	64	old	M	25	Fat	ITA	NA	NA	NA	CTR	NA	NA
PRJNA447983	VF18	64	old	M	26	Fat	ITA	NA	NA	NA	CTR	NA	NA
PRJNA447983	VF262	64	old	M	27	Fat	ITA	NA	NA	NA	CTR	NA	NA
PRJNA447983	VF174	66	old	M	24	Normal	ITA	NA	NA	NA	CRC	NA	NA
PRJNA447983	VF189	66	old	M	34	Obese	ITA	NA	NA	NA	CTR	NA	NA
PRJNA447983	VF172	67	old	M	26	Fat	ITA	NA	NA	NA	Adenoma	NA	NA
PRJNA447983	VF301	67	old	M	non	non	ITA	NA	NA	NA	Adenoma	NA	NA
PRJNA447983	VF71	67	old	F	21	Normal	ITA	NA	NA	NA	CRC	NA	NA
PRJNA447983	VF145	67	old	M	35	Obese	ITA	NA	NA	NA	CRC	NA	NA
PRJNA447983	VF140	67	old	F	24	Normal	ITA	NA	NA	NA	CTR	NA	NA
PRJNA447983	GF12	68	old	F	30	Obese	ITA	NA	NA	NA	Adenoma	NA	NA
PRJNA447983	VF40	68	old	F	22	Normal	ITA	NA	NA	NA	CTR	NA	NA
PRJNA447983	VF232	69	old	M	27	Fat	ITA	NA	NA	NA	CRC	NA	NA
PRJNA447983	VF65	69	old	F	29	Fat	ITA	NA	NA	NA	CRC	NA	NA
PRJNA447983	VF261	69	old	M	24	Normal	ITA	NA	NA	NA	CTR	NA	NA
PRJNA447983	VF255	69	old	M	30	Obese	ITA	NA	NA	NA	CTR	NA	NA
PRJNA447983	VF04	70	old	F	21	Normal	ITA	NA	NA	NA	Adenoma	NA	NA
PRJNA447983	VF97	70	old	M	28	Fat	ITA	NA	NA	NA	Adenoma	NA	NA
PRJNA447983	VF77	70	old	M	24	Normal	ITA	NA	NA	NA	CRC	NA	NA
PRJNA447983	VF06	70	old	F	20	Normal	ITA	NA	NA	NA	CTR	NA	NA
PRJNA447983	VF170	70	old	F	25	Fat	ITA	NA	NA	NA	CTR	NA	NA
PRJNA447983	VF95	71	old	F	30	Obese	ITA	NA	NA	NA	CRC	NA	NA
PRJNA447983	VF259	71	old	M	24	Normal	ITA	NA	NA	NA	CTR	NA	NA
PRJNA447983	VF00TL	71	old	M	25	Fat	ITA	NA	NA	NA	CTR	NA	NA
PRJNA447983	VF02	73	old	F	31	Obese	ITA	NA	NA	NA	Adenoma	NA	NA
PRJNA447983	VF208	74	old	M	23	Normal	ITA	NA	NA	NA	CRC	NA	NA
PRJNA447983	VF29	74	old	M	25	Fat	ITA	NA	NA	NA	CRC	NA	NA
PRJNA447983	GF15	75	old	M	non	non	ITA	NA	NA	NA	CRC	NA	NA
PRJNA447983	VF281	76	old	M	26	Fat	ITA	NA	NA	NA	CRC	NA	NA
PRJNA447983	GF16	77	old	F	20	Normal	ITA	NA	NA	NA	Adenoma	NA	NA
PRJNA447983	VF197	77	old	M	36	Obese	ITA	NA	NA	NA	Adenoma	NA	NA
PRJNA447983	VF55	77	old	M	24	Normal	ITA	NA	NA	NA	Adenoma	NA	NA
PRJNA447983	VF154	77	old	M	22	Normal	ITA	NA	NA	NA	CRC	NA	NA
PRJNA447983	VF114	77	old	M	23	Normal	ITA	NA	NA	NA	CRC	NA	NA
PRJNA447983	VF171	77	old	F	non	non	ITA	NA	NA	NA	CTR	NA	NA
PRJNA447983	VF264	78	old	M	24	Normal	ITA	NA	NA	NA	CRC	NA	NA
PRJNA447983	VF192	78	old	M	26	Fat	ITA	NA	NA	NA	CRC	NA	NA
PRJNA447983	VF107	78	old	M	30	Obese	ITA	NA	NA	NA	CRC	NA	NA
PRJNA447983	VF38	79	old	M	22	Normal	ITA	NA	NA	NA	Adenoma	NA	NA
PRJNA447983	VF206	80	old	M	24	Normal	ITA	NA	NA	NA	CTR	NA	NA
PRJNA447983	VF212	80	old	F	32	Obese	ITA	NA	NA	NA	CTR	NA	NA
PRJNA447983	VF263	81	old	F	28	Fat	ITA	NA	NA	NA	CTR	NA	NA
PRJNA447983	VF217	82	old	M	28	Fat	ITA	NA	NA	NA	CRC	NA	NA
PRJNA447983	VF166	83	old	F	19	Normal	ITA	NA	NA	NA	CRC	NA	NA
PRJNA447983	VF273	83	old	F	24	Normal	ITA	NA	NA	NA	CRC	NA	NA
PRJNA447983	VF216	84	old	M	22	Normal	ITA	NA	NA	NA	CRC	NA	NA
PRJNA447983	VF251	84	old	F	23	Normal	ITA	NA	NA	NA	CRC	NA	NA
PRJNA447983	SBJ27C	non	non	non	non	non	ITA	NA	NA	NA	CRC	NA	NA
PRJNA447983	SBJ26C	non	non	non	non	non	ITA	NA	NA	NA	CRC	NA	NA
PRJNA447983	SBJ25C	non	non	non	non	non	ITA	NA	NA	NA	CRC	NA	NA
PRJNA447983	SBJ22C	non	non	non	non	non	ITA	NA	NA	NA	CRC	NA	NA
PRJNA447983	SBJ20C	non	non	non	non	non	ITA	NA	NA	NA	CRC	NA	NA
PRJNA447983	SBJ61C	non	non	non	non	non	ITA	NA	NA	NA	CRC	NA	NA
PRJNA447983	SBJ50C	non	non	non	non	non	ITA	NA	NA	NA	CRC	NA	NA
PRJNA447983	SBJ49C	non	non	non	non	non	ITA	NA	NA	NA	CRC	NA	NA
PRJNA447983	SBJ52C	non	non	non	non	non	ITA	NA	NA	NA	CRC	NA	NA
PRJNA447983	SBJ51C	non	non	non	non	non	ITA	NA	NA	NA	CRC	NA	NA
PRJNA447983	SBJ42C	non	non	non	non	non	ITA	NA	NA	NA	CRC	NA	NA
PRJNA447983	SBJ47C	non	non	non	non	non	ITA	NA	NA	NA	CRC	NA	NA
PRJNA447983	SBJ55C	non	non	non	non	non	ITA	NA	NA	NA	CRC	NA	NA
PRJNA447983	SBJ53C	non	non	non	non	non	ITA	NA	NA	NA	CRC	NA	NA
PRJNA447983	SBJ36C	non	non	non	non	non	ITA	NA	NA	NA	CRC	NA	NA
PRJNA447983	SBJ35C	non	non	non	non	non	ITA	NA	NA	NA	CRC	NA	NA
PRJNA447983	SBJ32C	non	non	non	non	non	ITA	NA	NA	NA	CRC	NA	NA
PRJNA447983	SBJ33C	non	non	non	non	non	ITA	NA	NA	NA	CRC	NA	NA
PRJNA447983	SBJ29C	non	non	non	non	non	ITA	NA	NA	NA	CRC	NA	NA
PRJNA447983	SBJ31C	non	non	non	non	non	ITA	NA	NA	NA	CRC	NA	NA
PRJNA447983	SBJ39C	non	non	non	non	non	ITA	NA	NA	NA	CRC	NA	NA
PRJNA447983	SBJ40C	non	non	non	non	non	ITA	NA	NA	NA	CRC	NA	NA
PRJNA447983	SBJ12C	non	non	non	non	non	ITA	NA	NA	NA	CRC	NA	NA
PRJNA447983	SBJ11C	non	non	non	non	non	ITA	NA	NA	NA	CRC	NA	NA
PRJNA447983	SBJ06C	non	non	non	non	non	ITA	NA	NA	NA	CRC	NA	NA
PRJNA447983	SBJ05C	non	non	non	non	non	ITA	NA	NA	NA	CRC	NA	NA
PRJNA447983	SBJ10C	non	non	non	non	non	ITA	NA	NA	NA	CRC	NA	NA
PRJNA447983	SBJ07C	non	non	non	non	non	ITA	NA	NA	NA	CRC	NA	NA
PRJNA447983	SBJ02C	non	non	non	non	non	ITA	NA	NA	NA	CRC	NA	NA
PRJNA447983	SBJ01C	non	non	non	non	non	ITA	NA	NA	NA	CRC	NA	NA
PRJNA447983	SBJ04C	non	non	non	non	non	ITA	NA	NA	NA	CRC	NA	NA
PRJNA447983	SBJ64C	non	non	non	non	non	ITA	NA	NA	NA	CRC	NA	NA
PRJNA447983	GF06	non	non	F	25	Fat	ITA	NA	NA	NA	CTR	NA	NA
PRJNA447983	SBJ24H	non	non	non	non	non	ITA	NA	NA	NA	CTR	NA	NA
PRJNA447983	SBJ21H	non	non	non	non	non	ITA	NA	NA	NA	CTR	NA	NA
PRJNA447983	SBJ18H	non	non	non	non	non	ITA	NA	NA	NA	CTR	NA	NA
PRJNA447983	SBJ17H	non	non	non	non	non	ITA	NA	NA	NA	CTR	NA	NA
PRJNA447983	SBJ16H	non	non	non	non	non	ITA	NA	NA	NA	CTR	NA	NA
PRJNA447983	SBJ69H	non	non	non	non	non	ITA	NA	NA	NA	CTR	NA	NA
PRJNA447983	SBJ73H	non	non	non	non	non	ITA	NA	NA	NA	CTR	NA	NA
PRJNA447983	SBJ63H	non	non	non	non	non	ITA	NA	NA	NA	CTR	NA	NA
PRJNA447983	SBJ45H	non	non	non	non	non	ITA	NA	NA	NA	CTR	NA	NA
PRJNA447983	SBJ46H	non	non	non	non	non	ITA	NA	NA	NA	CTR	NA	NA
PRJNA447983	SBJ37H	non	non	non	non	non	ITA	NA	NA	NA	CTR	NA	NA
PRJNA447983	SBJ34H	non	non	non	non	non	ITA	NA	NA	NA	CTR	NA	NA
PRJNA447983	SBJ78H	non	non	non	non	non	ITA	NA	NA	NA	CTR	NA	NA
PRJNA447983	SBJ77H	non	non	non	non	non	ITA	NA	NA	NA	CTR	NA	NA
PRJNA447983	SBJ75H	non	non	non	non	non	ITA	NA	NA	NA	CTR	NA	NA
PRJNA447983	SBJ74H	non	non	non	non	non	ITA	NA	NA	NA	CTR	NA	NA
PRJNA447983	SBJ82H	non	non	non	non	non	ITA	NA	NA	NA	CTR	NA	NA
PRJNA447983	SBJ81H	non	non	non	non	non	ITA	NA	NA	NA	CTR	NA	NA
PRJNA447983	SBJ80H	non	non	non	non	non	ITA	NA	NA	NA	CTR	NA	NA
PRJNA447983	SBJ79H	non	non	non	non	non	ITA	NA	NA	NA	CTR	NA	NA
PRJNA447983	SBJ84H	non	non	non	non	non	ITA	NA	NA	NA	CTR	NA	NA
PRJNA447983	SBJ83H	non	non	non	non	non	ITA	NA	NA	NA	CTR	NA	NA
PRJNA447983	SBJ03H	non	non	non	non	non	ITA	NA	NA	NA	CTR	NA	NA
PRJNA447983	SBJ65H	non	non	non	non	non	ITA	NA	NA	NA	CTR	NA	NA
PRJNA447983	SBJ67H	non	non	non	non	non	ITA	NA	NA	NA	CTR	NA	NA
PRJNA447983	SBJ68H	non	non	non	non	non	ITA	NA	NA	NA	CTR	NA	NA
PRJNA447983	SBJ57H	non	non	non	non	non	ITA	NA	NA	NA	CTR	NA	NA
PRJNA447983	SBJ60H	non	non	non	non	non	ITA	NA	NA	NA	CTR	NA	NA
PRJNA531273	SAMN07448978	22	young	F	23.23	Normal	IND	NA	NA	NA	CTR	NA	NA
PRJNA531273	SAMN07448981	23	young	F	19.23	Normal	IND	NA	NA	NA	CTR	NA	NA
PRJNA531273	SAMN07448975	23	young	F	22.31	Normal	IND	NA	NA	NA	CTR	NA	NA
PRJNA531273	SAMN07448980	24	young	F	23.26	Normal	IND	NA	NA	NA	CTR	NA	NA
PRJNA531273	SAMN07448977	24	young	M	26.04	Fat	IND	NA	NA	NA	CTR	NA	NA
PRJNA531273	SAMN07448976	25	young	F	21.27	Normal	IND	NA	NA	NA	CTR	NA	NA
PRJNA531273	SAMN07448984	25	young	M	21.72	Normal	IND	NA	NA	NA	CTR	NA	NA
PRJNA531273	SAMN07449014	25	young	M	24.8	Normal	IND	NA	NA	NA	CTR	NA	NA
PRJNA531273	SAMN07448983	26	young	F	20.82	Normal	IND	NA	NA	NA	CTR	NA	NA
PRJNA531273	SAMN07448985	26	young	F	20.82	Normal	IND	NA	NA	NA	CTR	NA	NA
PRJNA531273	SAMN07448982	26	young	F	22.03	Normal	IND	NA	NA	NA	CTR	NA	NA
PRJNA531273	SAMN07448986	26	young	M	23.34	Normal	IND	NA	NA	NA	CTR	NA	NA
PRJNA531273	SAMN07449013	26	young	M	24.68	Normal	IND	NA	NA	NA	CTR	NA	NA
PRJNA531273	SAMN07448979	29	young	F	22.03	Normal	IND	NA	NA	NA	CTR	NA	NA
PRJNA531273	SAMN07449011	30	young	M	24.98	Normal	IND	NA	NA	NA	CTR	NA	NA
PRJNA531273	SAMN11355252	41	middle-age	non	19.22	Normal	IND	I	T2M0N0	Rectum	CRC	Positive	NA
PRJNA531273	SAMN11355265	47	middle-age	F	23.81	Normal	IND	I	T1N0M0	Rectum	CRC	Positive	NA
PRJNA531273	SAMN11355254	48	middle-age	M	18.69	Normal	IND	II	T3N0M0	Rectum	CRC	Positive	NA
PRJNA531273	SAMN11355258	49	middle-age	M	20.83	Normal	IND	III	T4N1M0	Colon	CRC	Positive	NA
PRJNA531273	SAMN07448996	50	middle-age	F	17.93	Low	IND	NA	NA	NA	CTR	NA	NA
PRJNA531273	SAMN07449073	50	middle-age	F	25.13	Fat	IND	NA	NA	NA	CTR	NA	NA
PRJNA531273	SAMN07449057	50	middle-age	F	27.06	Fat	IND	NA	NA	NA	CTR	NA	NA
PRJNA531273	SAMN07448994	52	middle-age	F	23	Normal	IND	NA	NA	NA	CTR	NA	NA
PRJNA531273	SAMN11355266	53	middle-age	F	22.97	Normal	IND	III	T4N1M0	Rectum	CRC	Positive	NA
PRJNA531273	SAMN07449071	53	middle-age	F	26.84	Fat	IND	NA	NA	NA	CTR	NA	NA
PRJNA531273	SAMN11355272	54	middle-age	M	18.96	Normal	IND	I	T2N0M0	Colon	CRC	Positive	NA
PRJNA531273	SAMN11355257	55	middle-age	M	19.14	Normal	IND	III	T3N2aM0	Sigma	CRC	Positive	NA
PRJNA531273	SAMN11355255	56	middle-age	M	20.45	Normal	IND	III	T4N1M0	Rectum	CRC	Positive	NA
PRJNA531273	SAMN11355264	56	middle-age	F	22.22	Normal	IND	III	T4N1M0	Rectum	CRC	Positive	NA
PRJNA531273	SAMN11355268	57	middle-age	M	21.7	Normal	IND	I	T1N0M0	Colon	CRC	Positive	NA
PRJNA531273	SAMN07448991	57	middle-age	M	17.94	Low	IND	NA	NA	NA	CTR	NA	NA
PRJNA531273	SAMN07448992	57	middle-age	F	20.83	Normal	IND	NA	NA	NA	CTR	NA	NA
PRJNA531273	SAMN11355277	58	middle-age	M	19.92	Normal	IND	I	T2N0M0	Rectum	CRC	Positive	NA
PRJNA531273	SAMN11355271	58	middle-age	F	21.49	Normal	IND	III	T4N1M0	Sigma	CRC	Positive	NA
PRJNA531273	SAMN11355261	58	middle-age	F	22.67	Normal	IND	III	T4N1M0	Sigma	CRC	Positive	NA
PRJNA531273	SAMN07448997	58	middle-age	M	19.22	Normal	IND	NA	NA	NA	CTR	NA	NA
PRJNA531273	SAMN07448999	58	middle-age	F	19.94	Normal	IND	NA	NA	NA	CTR	NA	NA
PRJNA531273	SAMN07449077	58	middle-age	F	25.65	Fat	IND	NA	NA	NA	CTR	NA	NA
PRJNA531273	SAMN11355262	59	middle-age	M	19.1	Normal	IND	III	T4aN2bM0	Sigma	CRC	Positive	NA
PRJNA531273	SAMN11355275	59	middle-age	F	20.34	Normal	IND	III	T4N1M0	Rectum	CRC	Positive	NA
PRJNA531273	SAMN11355256	59	middle-age	M	21.4	Normal	IND	I	T2N0M0	Rectum	CRC	Positive	NA
PRJNA531273	SAMN11355276	60	old	M	18.33	Low	IND	I	T2N0M0	Rectum	CRC	Positive	NA
PRJNA531273	SAMN11355267	61	old	M	19.47	Normal	IND	III	T3N2aM0	Colon	CRC	Positive	NA
PRJNA531273	SAMN07448998	61	old	M	19.49	Normal	IND	NA	NA	NA	CTR	NA	NA
PRJNA531273	SAMN11355273	62	old	F	20.03	Normal	IND	IV	T2N0M1	Colon	CRC	Positive	NA
PRJNA531273	SAMN11355250	62	old	M	20.08	Normal	IND	I	T2N0M0	Rectum	CRC	Positive	NA
PRJNA531273	SAMN07448995	62	old	M	20.82	Normal	IND	NA	NA	NA	CTR	NA	NA
PRJNA531273	SAMN07448990	62	old	F	22.95	Normal	IND	NA	NA	NA	CTR	NA	NA
PRJNA531273	SAMN11355269	64	old	M	20.08	Normal	IND	I	T1N0M0	Rectum	CRC	Positive	NA
PRJNA531273	SAMN07448989	64	old	F	36.42	Obese	IND	NA	NA	NA	CTR	NA	NA
PRJNA531273	SAMN11355253	65	old	M	20.32	Normal	IND	III	pT2N2M0	Rectum	CRC	Positive	NA
PRJNA531273	SAMN11355251	65	old	F	21.01	Normal	IND	III	T3N2aM0	Colon	CRC	Positive	NA
PRJNA531273	SAMN11355274	66	old	F	18.73	Normal	IND	III	T4N1M0	Sigma	CRC	Positive	NA
PRJNA531273	SAMN11355263	66	old	F	20.5	Normal	IND	I	T1N0M0	Colon	CRC	Positive	NA
PRJNA531273	SAMN11355279	67	old	M	17.69	Low	IND	III	T3N2aM0	Rectum	CRC	Positive	NA
PRJNA531273	SAMN11355270	71	old	M	18.07	Low	IND	I	T1N0M0	Colon	CRC	Positive	NA
PRJNA531273	SAMN11355278	71	old	M	20.03	Normal	IND	III	T4N1M0	Sigma	CRC	Positive	NA
PRJNA531273	SAMN07448993	71	old	M	19.22	Normal	IND	NA	NA	NA	CTR	NA	NA
PRJNA531273	SAMN11355259	72	old	M	18.22	Low	IND	III	T3N2aM0	Colon	CRC	Positive	NA
PRJNA531273	SAMN11355260	75	old	F	21.21	Normal	IND	III	T3N2aM0	Rectum	CRC	Positive	NA

## Sheet: Table S2
Enterotype 1, CTR vs. CRC						Enterotype 2, CTR vs. CRC						Enterotype 3, CTR vs. CRC						Enterotype 1, CTR vs. ADN						Enterotype 2, CTR vs. ADN						Enterotype 3, CTR vs. ADN
Protein	log(MaxAvg)	Group	log(LDA)	pval		Protein	log(MaxAvg)	Group	log(LDA)	pval		Protein	log(MaxAvg)	Group	log(LDA)	pval		Protein	log(MaxAvg)	Group	log(LDA)	pval		Protein	log(MaxAvg)	Group	log(LDA)	pval		Protein	log(MaxAvg)	Group	log(LDA)	pval
UniRef90_D4LY41_Signaltransductionhistidinekinase	4.10816	CTR	2.87764	0.000946182		UniRef90_F3PNT7_Relaxase_mobilizationnucleasedomainprotein	3.66973	CRC	3.03264	0.00391919		UniRef90_W1I8Q3_UnculturedbacteriumextrachromosomalDNARGF00115	4.14919	CRC	3.40779	0.00401573		UniRef90_D4KN84_Antirestrictionprotein	4.05297	Adenoma	3.35925	0.0103496		UniRef90_W1AQL8_Mobileelementprotein	3.54894	Adenoma	3.14929	0.0372877		UniRef90_A1HQJ5_50SribosomalproteinL33	3.52272	Adenoma	3.00495	0.00263491
UniRef90_E5VPH2_IS605OrfBfamilytransposase	3.42344	CTR	2.82952	0.0180871		UniRef90_B5CUJ8_Integrasecoredomainprotein	3.65184	CRC	2.9198	0.00471975		UniRef90_F3PHK0_Conserveddomainprotein	3.29963	CRC	2.95525	0.00916869		UniRef90_A1A091_TranslationinitiationfactorIF_1	3.83613	Adenoma	3.34292	0.0106747		UniRef90_P0AEP2_Galactose_protonsymporter	3.37347	Adenoma	3.01104	0.00520883		UniRef90_D1PH90_Transposase	3.26895	Adenoma	2.83526	0.0160365
UniRef90_D4K9V9_Site_specificDNAmethylase	3.45857	CTR	2.78129	0.000132234		UniRef90_B5CXR8_ISPg5_transposaseOrf2	3.5187	CRC	2.77059	0.00523209		UniRef90_Q5LI34_50SribosomalproteinL34	3.52592	CRC	2.938	3.09184e-05		UniRef90_D4KKP9_Site_specificrecombinaseXerD	3.98168	Adenoma	3.2306	0.00988489		UniRef90_P0A9P7_ATP_dependentRNAhelicaseDeaD	3.30837	Adenoma	2.92659	0.0251554		UniRef90_D4KTC2_TransposaseDDEdomain	3.2094	Adenoma	2.72815	0.0340141
UniRef90_D4L1Y8_DNA_directedRNApolymerasespecializedsigmasubunit_sigma24homolog	3.74617	CTR	2.75032	0.0108913		UniRef90_W1I7I5_UnculturedbacteriumextrachromosomalDNARGI01876	3.12578	CRC	2.73801	0.0245485		UniRef90_E5WU41_ExcisionasefamilyDNAbindingdomain_containingprotein	3.36694	CRC	2.73826	0.000286194		UniRef90_F3AZU8_Transposase	3.67759	Adenoma	3.16694	0.00721172		UniRef90_A7ZT30_UniversalstressproteinB	3.33217	Adenoma	2.92155	0.0250005		UniRef90_D4KTC1_Transposaseandinactivatedderivatives	3.17724	Adenoma	2.68323	0.0274592
UniRef90_C7H2B3_Plasmidrecombinationenzyme	3.58379	CTR	2.74116	0.000169466		UniRef90_B5CUJ7_ISPg5_transposaseOrf1	3.56663	CRC	2.73001	0.00558803		UniRef90_F3PNT7_Relaxase_mobilizationnucleasedomainprotein	3.19681	CRC	2.72419	0.000376899		UniRef90_C4ZBS3_30SribosomalproteinS19	3.99047	Adenoma	3.13543	0.00777196		UniRef90_Q8XBW9_ProteinHokE	3.33146	Adenoma	2.9207	0.00386236		UniRef90_R6U0H8_TranscriptionalregulatorAraCfamily	3.45389	Adenoma	2.64661	0.0155863
UniRef90_D4L1Y4_Helix_turn_helix	3.69984	CTR	2.71671	0.0268331		UniRef90_D1PDZ5_Transposase_IS4family	2.97076	CRC	2.56739	0.017805		UniRef90_G8IJI8_Transposase	3.18666	CRC	2.64873	1.6665e-07		UniRef90_D4KJY8_ResponseregulatorsconsistingofaCheY_likereceiverdomainandawinged_helixDNA_bindingdomain	3.76308	Adenoma	3.10144	0.00241661		UniRef90_P0CF06_InsertionelementIS1proteinInsA	3.3329	Adenoma	2.89492	0.0166759		UniRef90_K1S6P4_Replicationprotein	2.89397	Adenoma	2.63737	0.00954003
UniRef90_D4KTF5_PredictedATPase_AAA_superfamily_	3.78372	CTR	2.70206	0.00122693		UniRef90_W1AQL8_Mobileelementprotein	3.05676	CRC	2.52983	0.00647711		UniRef90_P30899_Beta_lactamase	3.29644	CRC	2.60733	0.0136242		UniRef90_C4Z2R6_30SribosomalproteinS12	3.65946	Adenoma	2.9086	0.0203219		UniRef90_P62524_ilvoperonleaderpeptide	3.30653	Adenoma	2.89438	0.000678072		UniRef90_D5HH09_H_Antiporterprotein	2.35752	Adenoma	2.39722	0.00496986
UniRef90_D4K8Y0_Phage_plasmidprimase_P4family_C_terminaldomain	3.48142	CTR	2.68143	0.000427575		UniRef90_G8IJI8_Transposase	3.3694	CRC	2.51671	0.021168		UniRef90_P37247_TransposaseforinsertionsequenceelementIS4351	3.26557	CRC	2.52363	0.0229425		UniRef90_Q8G7I6_Glucose_6_phosphateisomerase	3.52892	Adenoma	2.90731	0.0174044		UniRef90_A8AQG0_DNA_bindingproteinFis	3.28927	Adenoma	2.8281	0.0194272		UniRef90_D4LY53_Helix_turn_helix	2.38381	Adenoma	2.34161	0.0116473
UniRef90_C6JBK7_IS605OrfBfamilytransposase	3.43681	CTR	2.66514	0.0466138		UniRef90_B3JNP7_Transposase	3.31684	CRC	2.5111	0.012617		UniRef90_F0R9D1_Addictionmoduletoxin_Txe_YoeBfamily	2.96316	CRC	2.50978	0.0384998		UniRef90_K7ZQ43_ReplicationproteinA	3.2956	CTR	2.90214	0.018832		UniRef90_P68768_Cytosolaminopeptidase	3.21035	Adenoma	2.82325	0.0017042		UniRef90_D6D1V0_DNAbindingdomain_excisionasefamily	2.73232	Adenoma	2.16606	0.018856
UniRef90_B0G2M5_Succinatedehydrogenaseiron_sulfursubunit	3.41795	CTR	2.65937	0.00176671		UniRef90_B3JHP4_GroupIIintron_maturase_specificdomainprotein	2.96138	CRC	2.50043	0.029252		UniRef90_Q5L8Z8_Malatedehydrogenase	3.13655	CRC	2.47642	3.97854e-05		UniRef90_D4JAB3_Glyoxalase_Bleomycinresistanceprotein_Dioxygenasesuperfamily	3.58624	Adenoma	2.86738	0.00084101		UniRef90_D6JB22_Predictedprotein	3.3571	Adenoma	2.82136	0.0284337		UniRef90_E5VDI9_Glucosamine_fructose_6_phosphateaminotransferase	2.5001	Adenoma	2.13449	0.0210984
UniRef90_D4L247_ABC_typemultidrugtransportsystem_ATPasecomponent	3.68519	CTR	2.65701	0.000259766		UniRef90_E4MCU7_Transposase_IS4family	2.93701	CRC	2.37371	0.0178063		UniRef90_B5A7G0_MobA	2.96396	CRC	2.43511	0.00094843		UniRef90_G2SWG8_Transposasemutatortype	3.46874	CTR	2.85031	0.00654949		UniRef90_W1I7I5_UnculturedbacteriumextrachromosomalDNARGI01876	3.16101	Adenoma	2.79744	0.0328714		UniRef90_F0R0G6_IS66Orf2familyprotein	2.59698	Adenoma	2.07622	0.0148496
UniRef90_C7H9Z0_NlpC_P60familyprotein	3.40748	CTR	2.62903	0.000367987		UniRef90_I3YJF5_Site_specificrecombinaseXerD	3.00882	CRC	2.33224	0.00402733		UniRef90_Q89Z59_ProbabletypeIrestrictionenzymeBthVORF4518PMprotein	2.96005	CRC	2.43288	0.0169991		UniRef90_C4ZFB9_TranscriptionalregulatorGltC	3.69306	Adenoma	2.84866	0.0105246		UniRef90_A8AMJ6_30SribosomalproteinS18	3.20824	Adenoma	2.76643	0.0023058
UniRef90_C4ZFB9_TranscriptionalregulatorGltC	3.55688	CTR	2.62865	0.00200796		UniRef90_B5A7F8_BUN24p15_5	3.23841	CRC	2.314	0.0431842		UniRef90_B5A7G1_MobB	2.92959	CRC	2.40188	0.00163434		UniRef90_D4JA34_ParB_likepartitionproteins	3.51251	Adenoma	2.83468	0.0208303		UniRef90_P0ADE3_UncharacterizedproteinYtfK	3.19533	Adenoma	2.7569	0.0162128
UniRef90_C7H7L9_ABCtransporter_ATP_bindingprotein	3.30902	CTR	2.61976	0.000130038		UniRef90_A8AQG0_DNA_bindingproteinFis	2.90442	CTR	2.29246	0.0031781		UniRef90_D7K6P6_RNA_directedDNApolymerase	2.96366	CRC	2.39526	0.0222114		UniRef90_D4LLA5_Glyoxalase_Bleomycinresistanceprotein_Dioxygenasesuperfamily	3.54909	Adenoma	2.83427	0.00183086		UniRef90_A7ZTI8_50SribosomalproteinL28	3.21103	Adenoma	2.73876	0.00438386
UniRef90_A1A091_TranslationinitiationfactorIF_1	3.51165	CTR	2.58222	0.0401379		UniRef90_I3YJW5_Site_specificrecombinaseXerD	2.93964	CRC	2.27686	0.00122046		UniRef90_Q8A485_30SribosomalproteinS171	3.2132	CRC	2.38775	0.0024272		UniRef90_R6BEM2_L_aspartateoxidase	3.51669	Adenoma	2.824	0.000516999		UniRef90_B5CW71_DNAbindingdomain_excisionasefamily	3.13222	Adenoma	2.71029	0.0479146
UniRef90_D4KKP9_Site_specificrecombinaseXerD	3.81136	CTR	2.57732	0.000724242		UniRef90_D4KTC2_TransposaseDDEdomain	2.94453	CTR	2.25715	0.0123122		UniRef90_R5K610_Adenylosuccinatelyase	3.06631	CRC	2.38082	0.000288615		UniRef90_C0FZI4_CDP_alcoholphosphatidyltransferase	3.52928	Adenoma	2.82038	0.0104164		UniRef90_A1HQJ5_50SribosomalproteinL33	3.2385	Adenoma	2.70429	0.0291643
UniRef90_D4L313_Retron_typereversetranscriptase	3.27775	CTR	2.56888	0.000702452		UniRef90_C7H5E8_RSAM_modifiedsix_cysteinepeptide	2.97419	CTR	2.25549	0.00184904		UniRef90_A5ZWU2_Conserveddomainprotein	2.85881	CRC	2.37004	0.0202925		UniRef90_D4LFS2_RNApolymerasesigmafactor_sigma_70family	3.72487	Adenoma	2.80989	0.0231133		UniRef90_Q32IP8_IS1ORF1	3.11339	Adenoma	2.6831	0.00765951
UniRef90_C7GCV8_Transposase	3.06058	CTR	2.56307	1.10802e-05		UniRef90_D4KTC1_Transposaseandinactivatedderivatives	2.93816	CTR	2.23602	0.0108724		UniRef90_R5C195_Glycine__tRNAligase	3.1217	CRC	2.35658	0.00101284		UniRef90_D4LR50_MonosaccharideABCtransporterATP_bindingprotein_CUT2family_TC3_A_1_2___	3.54614	Adenoma	2.80866	0.000744269		UniRef90_D1PDZ5_Transposase_IS4family	2.97447	Adenoma	2.62848	0.0257697
UniRef90_C7H895_Relaxase_mobilizationnucleasedomainprotein	3.25912	CTR	2.54991	0.000349336		UniRef90_A7ZT30_UniversalstressproteinB	2.85733	CTR	2.21695	0.00913208		UniRef90_Q5L8B9_50SribosomalproteinL14	3.16559	CRC	2.35612	0.00255813		UniRef90_D4JT21_DNAprimase_Bacterialtype_	3.64275	Adenoma	2.80373	0.00275363		UniRef90_D7K7T1_ISL3familytransposase	3.20255	CTR	2.55707	0.0174759
UniRef90_C7GCV7_Integrasecoredomainprotein	3.04739	CTR	2.5419	3.36997e-05		UniRef90_O07102_Helix_turn_helixdomain_containingprotein	2.85789	CTR	2.21197	0.00986762		UniRef90_Q5LAX0_BifunctionalproteinFolD	3.05201	CRC	2.33498	0.000153809		UniRef90_D4L309_ResponseregulatorsconsistingofaCheY_likereceiverdomainandawinged_helixDNA_bindingdomain	3.53029	Adenoma	2.79946	0.015291		UniRef90_K5ZAA1_ConjugativetransposonTraMprotein	3.24755	CTR	2.53583	0.0425697
UniRef90_D4K344_2_3_bisphosphoglycerate_independentphosphoglyceratemutase	3.34703	CTR	2.521	0.000179575		UniRef90_G6AUA7_Transposase_IS116_IS110_IS902family	2.67253	CRC	2.20337	0.0048548		UniRef90_Q5L8B5_30SribosomalproteinS3	3.12035	CRC	2.33468	0.00142096		UniRef90_D4LKG3_Methylene_tetrahydrofolatereductaseCterminal	3.51824	Adenoma	2.79608	0.00154272		UniRef90_P37247_TransposaseforinsertionsequenceelementIS4351	3.4659	CTR	2.50961	0.0265659
UniRef90_R7GXI2_Glucosamine_6_phosphatedeaminase	3.34633	CTR	2.51689	0.0280632		UniRef90_C7GCV7_Integrasecoredomainprotein	2.81477	CTR	2.19843	0.00224362		UniRef90_B5A7F8_BUN24p15_5	2.79853	CRC	2.33129	0.00319057		UniRef90_D4LMM9_50SribosomalproteinL3	3.52426	Adenoma	2.78713	0.00143818		UniRef90_A4WFH5_Site_specificDNA_methyltransferase_adenine_specific_	3.0866	Adenoma	2.41674	0.0293717
UniRef90_D4LH24_Transposase_IS605OrfBfamily_centralregion	3.26669	CTR	2.51185	0.00377337		UniRef90_Q5LES4_Sulfateadenylyltransferasesubunit2	3.39773	CRC	2.19275	0.0365156		UniRef90_Q8A475_30SribosomalproteinS10	3.15192	CRC	2.33013	0.00158322		UniRef90_D4LTE8_Glutamatesynthase_NADPH__homotetrameric	3.50582	Adenoma	2.78249	0.00113152		UniRef90_D4KJY8_ResponseregulatorsconsistingofaCheY_likereceiverdomainandawinged_helixDNA_bindingdomain	2.91964	Adenoma	2.38316	0.00170944
UniRef90_D4L2I7_Transposaseandinactivatedderivatives	3.53778	CTR	2.50523	5.14356e-05		UniRef90_Q56VG1_TraH	3.12637	CRC	2.18833	0.000476527		UniRef90_R6MNH0_CellshapedeterminingproteinMreB_Mrlfamily	3.23173	CRC	2.33003	0.0336347		UniRef90_B8DW24_50SribosomalproteinL24	3.52213	Adenoma	2.77059	0.0218605		UniRef90_D9QZL4_TRAGfamilyprotein	2.92868	Adenoma	2.35745	0.000408491
UniRef90_B8DW24_50SribosomalproteinL24	3.41203	CTR	2.49881	0.0294087		UniRef90_I3YM16_50SribosomalproteinL3	2.93061	CRC	2.18517	0.0273207		UniRef90_P94316_NAD_specificglutamatedehydrogenase	3.08249	CRC	2.32786	0.00071533		UniRef90_D4LQI2_Site_specificrecombinases_DNAinvertasePinhomologs	3.50898	Adenoma	2.76974	0.00709907		UniRef90_D4VA22_Putativelipoprotein	3.17113	CTR	2.3129	0.016599
UniRef90_A1A3S8_dCTPdeaminase_dUMP_forming	3.36552	CTR	2.4969	0.025406		UniRef90_D1PDG5_Integrasecoredomainprotein	2.48635	CRC	2.18272	0.0473222		UniRef90_P0CF06_InsertionelementIS1proteinInsA	2.82197	CRC	2.31175	0.0172084		UniRef90_Q5LI34_50SribosomalproteinL34	3.32983	CTR	2.76087	1.41412e-05		UniRef90_D7IXM9_Site_specificrecombinase_resolvasefamily	3.09323	CTR	2.31002	0.0411471
UniRef90_R7BSZ3_Phosphoenolpyruvatecarboxykinase_ATP_	3.48701	CTR	2.49638	0.00061522		UniRef90_G6AUA6_Transposase_IS116_IS110_IS902family	2.64721	CRC	2.16787	0.00322729		UniRef90_R6K3Z5_Inosine_5apos_monophosphatedehydrogenase	2.96867	CRC	2.31005	0.000449309		UniRef90_R7GXI2_Glucosamine_6_phosphatedeaminase	3.51252	Adenoma	2.75839	0.00466659		UniRef90_D9QZM2_Prophageantirepressor	2.95974	Adenoma	2.27522	0.000944495
UniRef90_D4JXW5_Ribose5_phosphateisomeraseRpiB	3.33176	CTR	2.49503	0.000274618		UniRef90_A8AMJ6_30SribosomalproteinS18	2.78656	CTR	2.1663	0.0204182		UniRef90_D4V4C3_Conserveddomainprotein	2.88697	CRC	2.30952	0.0373195		UniRef90_D4L153_Helix_turn_helix	3.51269	Adenoma	2.75445	0.00838378		UniRef90_A6L0V0_30SribosomalproteinS9	3.19683	CTR	2.26498	0.00191681
UniRef90_D4K016_HollidayjunctionATP_dependentDNAhelicaseRuvB	3.30535	CTR	2.49201	5.30058e-05		UniRef90_D4IMJ2_30SribosomalproteinS10	2.93605	CRC	2.16354	0.00474231		UniRef90_Q5L8C7_50SribosomalproteinL30	2.91978	CRC	2.30586	0.0207652		UniRef90_D4LZ49_3_isopropylmalatedehydratasesmallsubunit	3.57513	Adenoma	2.75009	0.00224509		UniRef90_A6KXK3_3_oxoacyl__acyl_carrier_protein_synthase3	3.30633	CTR	2.24144	0.0302007
UniRef90_R6QFJ5_FADdependentoxidoreductase	3.32214	CTR	2.48853	6.78553e-05		UniRef90_D1PFM4_Transposase_IS4family	2.54436	CRC	2.15252	0.000338044		UniRef90_Q5L8B2_50SribosomalproteinL2	3.1093	CRC	2.30199	0.00313019		UniRef90_R9KR53_30SribosomalproteinS10	3.53975	Adenoma	2.7469	0.0212861		UniRef90_A6L091_GlycinecleavagesystemHprotein	3.16499	CTR	2.24015	0.00312749
UniRef90_D4KAH4_Tagaturonatereductase	3.29488	CTR	2.46924	6.77496e-05		UniRef90_A7ZTI8_50SribosomalproteinL28	2.81496	CTR	2.1357	0.0394614		UniRef90_Q8A129_ATP_dependentClpproteaseproteolyticsubunit	3.1091	CRC	2.29203	0.00393508		UniRef90_R7D7S9_Hypoxanthinephosphoribosyltransferase	3.50244	Adenoma	2.74394	0.000580999		UniRef90_A6L2W9_RibosomalRNAlargesubunitmethyltransferaseH	3.08817	CTR	2.23024	0.00101077
UniRef90_D3R7J7_L_ribulose_5_phosphate4_epimerase	3.34537	CTR	2.46693	0.0265813		UniRef90_D1PDG3_ISPg3_transposase	2.48729	CRC	2.13145	0.0015406		UniRef90_A6KZ78_Acylcarrierprotein	2.94959	CRC	2.27528	0.000123895		UniRef90_F8APB6_GfdTprotein	3.26833	CTR	2.73362	0.00169131		UniRef90_A6KWR4_L_rhamnosemutarotase	3.11739	CTR	2.22996	0.000719889
UniRef90_D4K211_Deoxyribose_phosphatealdolase	3.32693	CTR	2.46631	0.000320493		UniRef90_Q8A525_PutativeGMPsynthase_glutamine_hydrolyzing_2	3.0687	CRC	2.12427	0.00796823		UniRef90_G8UJ67_ElongationfactorTuGTPbindingdomainprotein	2.88925	CRC	2.26311	0.00205054		UniRef90_R7GY78_Glycine__tRNAligase	3.50158	Adenoma	2.73087	0.000899265		UniRef90_F0R0T4_FeSassemblyproteinSufB	3.27458	CTR	2.22794	0.0154187
UniRef90_D4L309_ResponseregulatorsconsistingofaCheY_likereceiverdomainandawinged_helixDNA_bindingdomain	3.33429	CTR	2.45598	0.00136663		UniRef90_D1PDG4_IstB_likeATP_bindingprotein	2.41341	CRC	2.12289	0.0022636		UniRef90_A6L227_RibonucleaseY	2.93863	CRC	2.24814	0.000384578		UniRef90_D4LUY7_Carbamoyl_phosphatesynthasesmallchain	3.51484	Adenoma	2.73078	0.000933636		UniRef90_D9QZJ7_Mobilizationprotein	2.83368	Adenoma	2.22424	0.00167839
UniRef90_D4LTT2_Deoxyuridine5apos_triphosphatenucleotidohydrolase	3.20391	CTR	2.45477	0.0144205		UniRef90_I3YMY0_Transcriptiontermination_antiterminationproteinNusG	2.8795	CRC	2.11838	0.00481112		UniRef90_Q9AE24_TranscriptionalregulatoryproteinRprY	3.05015	CRC	2.24367	0.0039943		UniRef90_Q8G6V1_Ketol_acidreductoisomerase_NADP____2	3.52536	Adenoma	2.72782	0.0104433		UniRef90_A6KXY5_N_acetyl_gamma_glutamyl_phosphatereductase	3.19498	CTR	2.22296	0.00543008
UniRef90_D4JYC4_Carbamoyl_phosphatesynthasesmallchain	3.25458	CTR	2.45424	6.41997e-05		UniRef90_I3YM32_50SribosomalproteinL6	2.85885	CRC	2.11221	0.0188158		UniRef90_A6L050_2_3_bisphosphoglycerate_independentphosphoglyceratemutase	3.1044	CRC	2.24273	0.00234362		UniRef90_D4JE85_ABC_typemultidrugtransportsystem_ATPaseandpermeasecomponents	3.42488	Adenoma	2.71084	0.0438968		UniRef90_A6KYS3_Glycosyltransferasefamily2	3.08705	CTR	2.21719	0.000899956
UniRef90_D4LH36_Predictedtranscriptionalregulators	3.34534	CTR	2.45251	0.0372052		UniRef90_C7GCV8_Transposase	2.77541	CTR	2.10845	0.00193279		UniRef90_D6D1V0_DNAbindingdomain_excisionasefamily	2.82774	CRC	2.23297	0.0311437		UniRef90_B3DTV2_ATPsynthasesubunitalpha	3.43864	Adenoma	2.70882	0.0191865		UniRef90_R5U255_L_aspartateoxidase	3.26738	CTR	2.21508	0.027451
UniRef90_D4LPV8_Transporter_YbiRfamily	3.47388	CTR	2.45213	0.000102069		UniRef90_G6AUV9_Transposase	2.47797	CRC	2.10022	0.00479594		UniRef90_D4V6Y6_Conserveddomainprotein	2.74773	CRC	2.22097	0.00488852		UniRef90_B0G2M5_Succinatedehydrogenaseiron_sulfursubunit	3.55212	Adenoma	2.70072	0.0078665		UniRef90_Q8AAW1_L_arabinoseisomerase	3.28219	CTR	2.21396	0.0194781
UniRef90_C4ZEM7_Site_specificrecombinases_DNAinvertasePin_likeprotein	3.60002	CTR	2.45022	0.0207282		UniRef90_I3YHS7_Ion_translocatingoxidoreductasecomplexsubunitA	2.83923	CRC	2.10014	0.00650798		UniRef90_P0C652_InsertionelementIS1proteinInsA	2.71274	CRC	2.2207	0.0232426		UniRef90_D4LH24_Transposase_IS605OrfBfamily_centralregion	3.44694	Adenoma	2.69455	0.0361304		UniRef90_A6KYS7_30SribosomalproteinS15	3.19729	CTR	2.19719	0.0114345
UniRef90_D4K4V6_Phosphomannomutase	3.31837	CTR	2.44417	4.66894e-05		UniRef90_B3JGH3_Transposase	2.78667	CTR	2.09751	0.0232902		UniRef90_Q5LJ28_S_adenosylmethionine_tRNAribosyltransferase_isomerase	2.85138	CRC	2.21811	0.00163696		UniRef90_D4LWG4_ABC_typemultidrugtransportsystem_ATPaseandpermeasecomponents	3.49282	Adenoma	2.69354	0.0172124		UniRef90_A6KZ76_Ribonuclease3	3.05926	CTR	2.1908	0.00118762
UniRef90_D4K072_Uronateisomerase	3.19362	CTR	2.43238	1.55651e-05		UniRef90_D1PDR5_Transposase_IS4family	2.41637	CRC	2.09634	0.019521		UniRef90_B0G4M3_Resolvase_N_terminaldomainprotein	2.86501	CRC	2.21559	0.00284986		UniRef90_A1A093_30SribosomalproteinS13	3.46944	Adenoma	2.68705	0.0214593		UniRef90_A6L1X1_Adenylosuccinatesynthetase	3.24725	CTR	2.18717	0.0358313
UniRef90_R6Q519_Methionine__tRNAligase	3.28152	CTR	2.42966	0.000184455		UniRef90_Q5L8L7_ATP_dependentClpproteaseATP_bindingsubunitClpX	3.02824	CRC	2.08434	0.000511803		UniRef90_D4JTX2_ATPasesinvolvedinchromosomepartitioning	3.05924	CRC	2.21029	0.00364339		UniRef90_C4ZEM7_Site_specificrecombinases_DNAinvertasePin_likeprotein	3.69958	Adenoma	2.6848	0.0196387		UniRef90_A6KYL2_30SribosomalproteinS21	3.12059	CTR	2.18514	0.00336396
UniRef90_Q8G6V1_Ketol_acidreductoisomerase_NADP____2	3.44183	CTR	2.42958	0.0416974		UniRef90_R6Y9X7_Diaminopimelatedecarboxylase	2.87738	CRC	2.07999	0.00796298		UniRef90_P94598_Glutamatedehydrogenase	2.90039	CRC	2.20919	0.00626701		UniRef90_K1TQH2_Rubrerythrin_Fragment_	3.49864	Adenoma	2.68383	0.000145465		UniRef90_A6L0W8_1_deoxy_D_xylulose5_phosphatereductoisomerase	3.14131	CTR	2.1833	0.00482343
UniRef90_R6R743_CTPsynthase	3.25844	CTR	2.42869	0.000114569		UniRef90_P0CF06_InsertionelementIS1proteinInsA	2.84613	CTR	2.07578	0.0123577		UniRef90_D9QZM2_Prophageantirepressor	2.84446	CRC	2.19193	0.0171709		UniRef90_D4JA91_Thymidylatesynthase_FAD_	3.49112	Adenoma	2.66131	0.0341123		UniRef90_A6L0V1_30SribosomalproteinS2	3.25752	CTR	2.18064	0.035093
UniRef90_D4JYC0_Orotidine5apos_phosphatedecarboxylase	3.30086	CTR	2.42837	0.000446093		UniRef90_Q64MT2_Adenosylhomocysteinase	3.02174	CRC	2.05975	0.000426805		UniRef90_E5UVT7_Transposase	2.93517	CRC	2.18851	0.000315021		UniRef90_B7GN58_DNAprimase_smallsubunit	3.56208	CTR	2.65182	0.000344179		UniRef90_A6L028_RibosomematurationfactorRimP	3.09907	CTR	2.17859	0.00332722
UniRef90_D4K2V6_Phosphoribosylformylglycinamidinecyclo_ligase	3.24185	CTR	2.41936	3.01845e-05		UniRef90_R6DCI9_FeSassemblyproteinSufB	3.16334	CRC	2.05667	0.00444547		UniRef90_R5J6I6_Aspartate_semialdehydedehydrogenase	2.81163	CRC	2.18571	0.000347517		UniRef90_R5XIB9_MATEeffluxfamilyprotein	3.3411	Adenoma	2.61814	0.00409138		UniRef90_A6KYS6_S_ribosylhomocysteinelyase	3.11126	CTR	2.17836	0.00389258
UniRef90_R6QFI1_Phosphoenolpyruvate_proteinphosphotransferase	3.28109	CTR	2.4193	0.000219261		UniRef90_Q5LJ28_S_adenosylmethionine_tRNAribosyltransferase_isomerase	3.31178	CRC	2.05563	0.00891745		UniRef90_D9QZL4_TRAGfamilyprotein	2.79839	CRC	2.17593	0.048316		UniRef90_D4JA89_Helix_turn_helix	3.44826	Adenoma	2.61024	0.0185606		UniRef90_A6KXY8_Argininerepressor	3.11704	CTR	2.17766	0.00452499
UniRef90_R6PWE5_Cysteinedesulfurase	3.306	CTR	2.41846	0.000541033		UniRef90_R5U104_2_amino_3_ketobutyratecoenzymeAligase	3.24561	CRC	2.04679	0.0145824		UniRef90_D7IXM9_Site_specificrecombinase_resolvasefamily	2.78912	CRC	2.16979	0.000416735		UniRef90_D4JEF3_Prophageantirepressor	3.46892	Adenoma	2.58179	0.0368633		UniRef90_P0C652_InsertionelementIS1proteinInsA	2.77858	Adenoma	2.17685	0.033341
UniRef90_A5ZAV5_Transcriptionalregulator_MarRfamily	3.32839	CTR	2.41279	0.0380465		UniRef90_D4IJD3_Acetyl_CoAcarboxylase_carboxyltransferasecomponent_Subunitsalphaandbeta_	2.84453	CRC	2.04399	0.00849237		UniRef90_R5U104_2_amino_3_ketobutyratecoenzymeAligase	2.79613	CRC	2.16576	0.00169232		UniRef90_A5ZWU0_Rubredoxin	3.533	Adenoma	2.57482	0.00517018		UniRef90_R6DH93_Purinenucleosidephosphorylase	3.27112	CTR	2.1734	0.026705
UniRef90_B0G8X7_AntirestrictionproteinArdA	3.40026	CTR	2.40984	0.0064485		UniRef90_P0AEP2_Galactose_protonsymporter	2.75085	CTR	2.04217	0.000518284		UniRef90_Q8A1E9_N_acetylornithinecarbamoyltransferase	2.81469	CRC	2.16552	0.00427996		UniRef90_A1A095_DNA_directedRNApolymerasesubunitalpha	3.41207	Adenoma	2.54409	0.0139338		UniRef90_Q8A1A2_L_rhamnoseisomerase	3.24713	CTR	2.17005	0.0138789
UniRef90_D4KAL1_Plasmidstabilisationsystemprotein	3.37032	CTR	2.40588	0.00435507		UniRef90_P03009_ProbabletransposasefortransposonTn903	2.80253	CRC	2.03229	0.0262469		UniRef90_A6KYJ8_30SribosomalproteinS7	2.86214	CRC	2.15758	0.000122117		UniRef90_A1A092_50SribosomalproteinL36	3.40492	Adenoma	2.54287	0.00582142		UniRef90_A6KZJ8_Undecaprenyl_diphosphatase	3.18393	CTR	2.16796	0.0106823
UniRef90_C4Z1M9_Enolase	3.27295	CTR	2.40366	0.00474318		UniRef90_C7H895_Relaxase_mobilizationnucleasedomainprotein	2.9249	CTR	2.02936	0.000297563		UniRef90_Q8A624_ATP_dependent6_phosphofructokinase2	2.79647	CRC	2.15184	0.00350368		UniRef90_C7H2B3_Plasmidrecombinationenzyme	3.58379	CTR	2.54106	0.0133504		UniRef90_A6L0W6_RibosomematurationfactorRimM	3.08049	CTR	2.16695	0.00258884
UniRef90_D4LWG4_ABC_typemultidrugtransportsystem_ATPaseandpermeasecomponents	3.33678	CTR	2.40362	0.0123856		UniRef90_P0C652_InsertionelementIS1proteinInsA	2.7718	CRC	2.02346	0.00229119		UniRef90_Q5LGS0_Aspartate1_decarboxylase	2.77788	CRC	2.14898	0.00772777		UniRef90_D5HH09_H_Antiporterprotein	3.29156	Adenoma	2.53956	0.0250158		UniRef90_A6L162_NADH_quinoneoxidoreductasesubunitN	3.06282	CTR	2.16593	0.00196402
UniRef90_C7H5E8_RSAM_modifiedsix_cysteinepeptide	3.12429	CTR	2.4004	0.0247029		UniRef90_J9H4P8_Beta_ketoacyl_acyl_carrier_proteinsynthaseII	2.97027	CRC	2.00769	0.00116985		UniRef90_C6JAD5_IS605OrfBfamilytransposase	2.77675	CRC	2.1488	0.0027379		UniRef90_R5TWF3_Glyceraldehyde_3_phosphatedehydrogenase	3.32633	Adenoma	2.53442	0.00243537		UniRef90_A6L1J0_UPF0102proteinBVU_1879	3.05209	CTR	2.16469	0.00270308
UniRef90_D4K117_Signalrecognitionparticleprotein	3.22135	CTR	2.39865	8.48156e-05		UniRef90_Q8A320_Integrase	2.88477	CRC	2.00512	0.0233393		UniRef90_Q5LJ26_S_adenosylmethioninesynthase	2.80197	CRC	2.14788	0.00399515		UniRef90_C7H5E8_RSAM_modifiedsix_cysteinepeptide	3.12429	CTR	2.51993	0.000193134		UniRef90_A6L5E4_50SribosomalproteinL28	3.07183	CTR	2.16379	0.00360617
UniRef90_Q4KRH3_Transposase_like	3.22448	CTR	2.39697	0.0242788		UniRef90_D5EUQ7_30SribosomalproteinS4	2.46658	CRC	2.00003	4.44922e-05		UniRef90_D4KTF5_PredictedATPase_AAA_superfamily_	3.15827	CRC	2.14605	0.0430818		UniRef90_Q8A485_30SribosomalproteinS171	3.30666	CTR	2.50668	0.000879153		UniRef90_A6KYJ8_30SribosomalproteinS7	3.29788	CTR	2.16294	0.00958504
UniRef90_D4K413_ElongationfactorTs	3.19602	CTR	2.39409	2.98862e-05								UniRef90_D4VA22_Putativelipoprotein	2.7557	CRC	2.14334	9.8226e-05		UniRef90_B6XWP7_UDP_N_acetylglucosamine1_carboxyvinyltransferase	3.38914	Adenoma	2.50379	0.0217999		UniRef90_A6KZJ9_tRNApseudouridinesynthaseB	3.12815	CTR	2.1615	0.00986547
UniRef90_A8S6X1_TranslationinitiationfactorIF_1	3.12824	CTR	2.39239	1.74298e-06								UniRef90_J9GSU8_GlycineC_acetyltransferase	2.85088	CRC	2.14117	8.74947e-05		UniRef90_B5CT52_30SribosomalproteinS7	3.15292	Adenoma	2.48617	0.0254742		UniRef90_A6L169_NADH_quinoneoxidoreductasesubunitC_D	3.11586	CTR	2.16147	0.00839013
UniRef90_E2ZKQ5_Riboflavinsynthase_alphasubunit	3.20242	CTR	2.38885	0.000102168								UniRef90_R5JC86_Pyruvate_2_ketoisovaleratefamily2_oxoacid_acceptoroxidoreductasegammasubunit	2.78835	CRC	2.13544	0.00196058		UniRef90_C0FPA9_BAAT_acyl_CoAthioesterhydrolaseC_terminaldomainprotein	3.32976	Adenoma	2.45398	0.0161013		UniRef90_A6KYC8_Alpha_galactosidase	3.05095	CTR	2.16111	0.000946857
UniRef90_D4LWI0_Plasmidrecombinationenzyme	3.48024	CTR	2.38471	0.0211592								UniRef90_Q5LES4_Sulfateadenylyltransferasesubunit2	2.94616	CRC	2.13185	0.00230626		UniRef90_R6SKW0_30SribosomalproteinS7	3.27752	Adenoma	2.43994	0.00575403		UniRef90_A6L1U8_Lipoylsynthase	3.06733	CTR	2.16006	0.00239822
UniRef90_R6Q074_Transportpermeaseprotein	3.22012	CTR	2.38423	7.24851e-05								UniRef90_Q5LCV9_Xyloseisomerase	2.76774	CRC	2.1305	0.000201363		UniRef90_D4LY53_Helix_turn_helix	3.25206	Adenoma	2.43459	0.0164118		UniRef90_A6L1J5_Phosphatidylserinedecarboxylaseproenzyme	3.09394	CTR	2.1563	0.00240878
UniRef90_A1A095_DNA_directedRNApolymerasesubunitalpha	3.36626	CTR	2.38227	0.0338984								UniRef90_D4WAD6_Reversetranscriptase_RNA_dependentDNApolymerase_	2.71315	CRC	2.12336	0.0138271		UniRef90_C7H895_Relaxase_mobilizationnucleasedomainprotein	3.25912	CTR	2.43175	0.00563147		UniRef90_F0R0T1_Transcriptiontermination_antiterminationproteinNusA	3.23692	CTR	2.15262	0.0198104
UniRef90_P03009_ProbabletransposasefortransposonTn903	3.11634	CTR	2.3815	0.00944084								UniRef90_Q8A9J2_Uronateisomerase	2.88853	CRC	2.1219	0.00317904		UniRef90_D4K3M5_Antirestrictionprotein_ArdA_	3.28489	CTR	2.4298	0.00373486		UniRef90_A6KZJ2_tRNA_2_methylthio_N_6__dimethylallyladenosinesynthase	3.10128	CTR	2.15021	0.0077074
UniRef90_R6R868_Pyrimidine_nucleosidephosphorylase	3.20997	CTR	2.37469	0.000240287								UniRef90_C4ZBS3_30SribosomalproteinS19	3.07289	CRC	2.12095	0.0394766		UniRef90_D4K8Y0_Phage_plasmidprimase_P4family_C_terminaldomain	3.48142	CTR	2.42648	0.0346018		UniRef90_A6L2T0_UPF0145proteinBVU_2335	3.00555	CTR	2.1494	0.0024879
UniRef90_A7B6M9_FtsK_SpoIIIEfamilyprotein	3.30247	CTR	2.36756	0.00478502								UniRef90_R6DCI9_FeSassemblyproteinSufB	2.69296	CRC	2.12017	0.0017343		UniRef90_R5P6Y2_50SribosomalproteinL22	3.24184	Adenoma	2.42374	0.0105597		UniRef90_A6KWC4_Methionyl_tRNAformyltransferase	3.02231	CTR	2.14929	0.00187934
UniRef90_R6Q8D0_Methylglyoxalsynthase	3.19953	CTR	2.36636	0.000205981								UniRef90_Q8A015_BifunctionalenzymeLpxC_FabZ	2.76325	CRC	2.11934	0.00512951		UniRef90_Q8G6V2_Ketol_acidreductoisomerase_NADP____1	3.40842	CTR	2.42133	0.0066786		UniRef90_A6KYI4_50SribosomalproteinL24	3.2861	CTR	2.14659	0.0476179
UniRef90_D4JE85_ABC_typemultidrugtransportsystem_ATPaseandpermeasecomponents	3.26125	CTR	2.36612	0.0346103								UniRef90_Q5LI10_Argininosuccinatelyase	2.78275	CRC	2.11508	0.00468785		UniRef90_A1A081_50SribosomalproteinL5	3.38097	CTR	2.41255	0.00383987		UniRef90_A6L5I2_Proline__tRNAligase	3.14032	CTR	2.13391	0.0170115
UniRef90_E2ZFR5_BacterialmobilizationproteinMobC	3.13227	CTR	2.36471	0.00024248								UniRef90_Q5LD96_3_methyl_2_oxobutanoatehydroxymethyltransferase	2.75477	CRC	2.11424	0.00612882		UniRef90_Q8A475_30SribosomalproteinS10	3.23032	CTR	2.39849	0.00172393		UniRef90_A6L079_TranscriptionalregulatorMraZ	3.06995	CTR	2.13256	0.00407091
UniRef90_B6XWP7_UDP_N_acetylglucosamine1_carboxyvinyltransferase	3.34255	CTR	2.36278	0.0421442								UniRef90_Q8A1A2_L_rhamnoseisomerase	2.80972	CRC	2.11401	0.000601706		UniRef90_A1A3S8_dCTPdeaminase_dUMP_forming	3.36552	CTR	2.39151	0.00745667		UniRef90_A6KZL6_Putativemembraneproteininsertionefficiencyfactor	3.18754	CTR	2.1324	0.03229
UniRef90_E5VLE3_Conjugativetransposonprotein	3.29602	CTR	2.36069	0.00269661								UniRef90_R5LY84_Deoxyribose_phosphatealdolase	2.90265	CRC	2.10905	0.0324395		UniRef90_C7GCV8_Transposase	3.06058	CTR	2.38863	0.0410389		UniRef90_A6L064_30SribosomalproteinS20	3.11337	CTR	2.13201	0.0123744
UniRef90_R6QBN8_Energy_couplingfactortransporterATP_bindingproteinEcfA	3.23719	CTR	2.35453	0.000182799								UniRef90_A7UZZ4_Ferritin	2.761	CRC	2.1047	0.00701159		UniRef90_Q5L8B9_50SribosomalproteinL14	3.25276	CTR	2.38227	0.00312308		UniRef90_A6L0Y0_Glycosidehydrolasefamily32_candidatelevanase	3.06704	CTR	2.12972	0.00566831
UniRef90_D4K8C5_Ketopantoatereductase	3.23863	CTR	2.34463	0.00988912								UniRef90_R9KR53_30SribosomalproteinS10	2.77947	CRC	2.10285	0.00156863		UniRef90_Q8G7F4_PhosphateimportATP_bindingproteinPstB	3.3493	CTR	2.3772	0.009641		UniRef90_A6KXG9_Adenylyl_sulfatekinase	3.06761	CTR	2.12735	0.00279171
UniRef90_A1A081_50SribosomalproteinL5	3.38097	CTR	2.34265	0.0325021								UniRef90_A6KZN7_D_aminoacyl_tRNAdeacylase	2.75193	CRC	2.10265	4.58831e-05		UniRef90_C4Z1M9_Enolase	3.37587	Adenoma	2.37708	0.0327569		UniRef90_A6KZV1_tRNA_specific2_thiouridylaseMnmA3	3.10565	CTR	2.12524	0.0126057
UniRef90_D4KBW2_Mannitol_1_phosphate_altronatedehydrogenases	3.18983	CTR	2.32839	0.0012977								UniRef90_Q5LBQ4_PhosphateimportATP_bindingproteinPstB	2.75423	CRC	2.10156	0.000440956		UniRef90_D3R7J7_L_ribulose_5_phosphate4_epimerase	3.34537	CTR	2.37153	0.00787765		UniRef90_A6KXG4_UPF0246proteinBVU_413	3.00929	CTR	2.12364	0.0019626
UniRef90_R6QEG7_UDP_galactopyranosemutase	3.12948	CTR	2.32685	3.3117e-05								UniRef90_R6SZR0_Aspartatecarbamoyltransferase	2.73193	CRC	2.08622	0.00635853		UniRef90_R6MNH0_CellshapedeterminingproteinMreB_Mrlfamily	3.22566	CTR	2.36824	0.00157882		UniRef90_A6L7K0_Putativepre_16SrRNAnuclease	2.96051	CTR	2.12287	0.00048793
UniRef90_Q8G7I6_Glucose_6_phosphateisomerase	3.31542	CTR	2.32258	0.038418								UniRef90_R6SZ51_O_acetylhomoserinesulfhydrylase	2.74545	CRC	2.08231	0.00617458		UniRef90_D4VBZ6_Conserveddomainprotein_Fragment_	2.99039	CTR	2.3557	0.00148053		UniRef90_A6KZR2_Phosphopantetheineadenylyltransferase	3.11451	CTR	2.12032	0.0100209
UniRef90_C7HAW1_Malicenzyme_NADbindingdomainprotein	3.15518	CTR	2.32219	0.000369149								UniRef90_Q8A753_Phosphoglyceratekinase	2.76063	CRC	2.07937	0.00364196		UniRef90_D4JN20_Resolvase_Nterminaldomain	3.13781	CTR	2.35437	0.00969466		UniRef90_A6L011_Shikimatekinase	3.03544	CTR	2.11915	0.00625921
UniRef90_Q8G7F4_PhosphateimportATP_bindingproteinPstB	3.3493	CTR	2.32192	0.0313582								UniRef90_Q8A733_50SribosomalproteinL31typeB	2.57832	CRC	2.07767	0.00291008		UniRef90_A6L050_2_3_bisphosphoglycerate_independentphosphoglyceratemutase	3.17322	CTR	2.34917	0.00166642		UniRef90_A6L3C0_SsrA_bindingprotein	3.01699	CTR	2.11807	0.00221364
UniRef90_D4KAN2_RiboflavinbiosynthesisproteinRibBA	3.15088	CTR	2.32185	7.92238e-05								UniRef90_P0CF31_InsertionelementIS1proteinInsB	2.61893	CRC	2.07657	0.000872914		UniRef90_A1A033_50SribosomalproteinL7_L12	3.31255	CTR	2.3403	0.0135265		UniRef90_R6LKL1_AnthranilatesynthasecomponentI	2.99534	Adenoma	2.11753	0.0464114
UniRef90_D4K3U9_DAK2domainfusionproteinYloV	3.15599	CTR	2.32026	4.52694e-05								UniRef90_Q8AAW1_L_arabinoseisomerase	2.86208	CRC	2.07362	0.00317904		UniRef90_A5ZAV5_Transcriptionalregulator_MarRfamily	3.32839	CTR	2.33969	0.0220554		UniRef90_A6L5E7_RibosomalproteinS12methylthiotransferaseRimO	2.9729	CTR	2.11642	0.000771493
UniRef90_A8S8V5_DNAbindingdomain_excisionasefamily	3.16048	CTR	2.31809	8.86926e-05								UniRef90_K6A8K3_ConjugativetransposonTraMprotein	2.76129	CRC	2.06967	0.00094979		UniRef90_Q5L8B2_50SribosomalproteinL2	3.1793	CTR	2.33713	0.00165741		UniRef90_A6L0W0_Probablenicotinate_nucleotideadenylyltransferase	3.08133	CTR	2.11576	0.00918714
UniRef90_R6QIK7_Branched_chainaminoacidABCtransporterpermeaseprotein	3.16155	CTR	2.31307	0.000298457								UniRef90_A6L7P5_Lysine__tRNAligase	2.67244	CRC	2.06918	1.25545e-05		UniRef90_Q8A129_ATP_dependentClpproteaseproteolyticsubunit	3.15572	CTR	2.33057	0.000720514		UniRef90_R7P0B5_Two_componentsystemsensor	2.92892	CTR	2.11547	0.0015508
UniRef90_A1A033_50SribosomalproteinL7_L12	3.31255	CTR	2.31003	0.0341657								UniRef90_Q5L8W7_30SribosomalproteinS2	2.75455	CRC	2.06856	0.0172206		UniRef90_D4JXW5_Ribose5_phosphateisomeraseRpiB	3.33176	CTR	2.32416	0.0427939		UniRef90_R6YQA7_ProteinRecA	3.16171	CTR	2.11344	0.0406546
UniRef90_E5VLJ3_Sigma_70protein	3.37643	CTR	2.30927	0.0452071								UniRef90_A7ZTI8_50SribosomalproteinL28	2.57987	CRC	2.06651	0.0485134		UniRef90_P94316_NAD_specificglutamatedehydrogenase	3.1727	CTR	2.32326	0.00211535		UniRef90_A6L2V6_ATPphosphoribosyltransferase	3.03855	CTR	2.11313	0.00372032
UniRef90_D4KJY8_ResponseregulatorsconsistingofaCheY_likereceiverdomainandawinged_helixDNA_bindingdomain	3.50024	CTR	2.30534	0.00607425								UniRef90_Q8AA38_ProbabletranscriptionalregulatoryproteinBT_0627	2.96448	CRC	2.06587	0.0110796		UniRef90_Q5L8B5_30SribosomalproteinS3	3.21632	CTR	2.32183	0.00380054		UniRef90_D4V4L9_ROKfamilyprotein	2.98838	CTR	2.11311	0.00164287
UniRef90_D4K3U5_1_deoxy_D_xylulose5_phosphatereductoisomerase	3.0751	CTR	2.29984	0.000149872								UniRef90_Q8A525_PutativeGMPsynthase_glutamine_hydrolyzing_2	2.67451	CRC	2.058	0.000347406		UniRef90_Q56VG1_TraH	2.94663	CTR	2.31962	0.00597728		UniRef90_A6KXA1_10kDachaperonin	3.09935	CTR	2.10358	0.0124146
UniRef90_R6R074_ATPasecomponentsofABCtransporterswithduplicatedATPasedomains	3.09626	CTR	2.29812	7.94862e-05								UniRef90_D4VCC9_Conserveddomainprotein	2.6492	CRC	2.05629	0.000131971		UniRef90_A8S8V5_DNAbindingdomain_excisionasefamily	3.16048	CTR	2.31211	0.00129135		UniRef90_A6KYP1_Orotatephosphoribosyltransferase	3.07235	CTR	2.10152	0.00750531
UniRef90_D4JZP9_L_lactatedehydrogenase_FMN_dependent_andrelatedalpha_hydroxyaciddehydrogenases	3.14512	CTR	2.28784	0.000148899								UniRef90_Q8A997_tRNAN6_adenosinethreonylcarbamoyltransferase	2.69037	CRC	2.05553	0.00372809		UniRef90_D4JU10_Mn_dependenttranscriptionalregulator	3.03258	CTR	2.3051	0.00494509		UniRef90_A6L3K7_6_7_dimethyl_8_ribityllumazinesynthase	2.97626	CTR	2.10061	0.00179672
UniRef90_C4Z2U0_50SribosomalproteinL14	3.52199	CTR	2.28765	0.000582422								UniRef90_Q8A0Z3_ElongationfactorTs	2.762	CRC	2.04815	0.005444		UniRef90_D4K016_HollidayjunctionATP_dependentDNAhelicaseRuvB	3.30535	CTR	2.30269	0.019303		UniRef90_A6KXG8_Sulfateadenylyltransferasesubunit2	3.07569	CTR	2.09899	0.00450345
UniRef90_A1A058_30SribosomalproteinS9	3.29288	CTR	2.28399	0.044579								UniRef90_Q8A2S4_4_deoxy_L_threo_5_hexosulose_uronateketol_isomerase1	2.66203	CRC	2.04634	0.00167042		UniRef90_A1A058_30SribosomalproteinS9	3.29288	CTR	2.30126	0.00984546		UniRef90_A6L168_NADH_quinoneoxidoreductasesubunitH	3.11241	CTR	2.09873	0.00948171
UniRef90_C7H957_30SribosomalproteinS16	3.0814	CTR	2.28088	0.000511185								UniRef90_A6KZL6_Putativemembraneproteininsertionefficiencyfactor	2.7426	CRC	2.0453	0.00172278		UniRef90_V8C6H4_ATPsynthasesubunitbeta	3.07508	Adenoma	2.29885	0.0473065		UniRef90_A6L6E8_tRNAmodificationGTPaseMnmE	2.93659	CTR	2.09788	0.00106422
UniRef90_D4K4V0_NucleosideABCtransportermembraneprotein	3.18692	CTR	2.27459	0.000723693								UniRef90_R6FPH6_Phenylacetate_coenzymeAligase	2.71371	CRC	2.04278	0.0104075		UniRef90_R5C195_Glycine__tRNAligase	3.19121	CTR	2.29844	0.00236783		UniRef90_A6L2V8_Histidinol_phosphateaminotransferase	2.98683	CTR	2.09769	0.00218003
UniRef90_R6R0N5_S_adenosylmethionine_tRNAribosyltransferase_isomerase	3.04868	CTR	2.26863	3.30741e-05								UniRef90_Q8A2M0_HollidayjunctionATP_dependentDNAhelicaseRuvB	2.68673	CRC	2.03809	0.011629		UniRef90_R6QFJ5_FADdependentoxidoreductase	3.32214	CTR	2.29096	0.0205067		UniRef90_A6L046_RibonucleaseHII	3.08184	CTR	2.09693	0.00598132
UniRef90_C7H583_Adeninedeaminasefamilyprotein	3.07995	CTR	2.26813	0.00034884								UniRef90_Q8A012_Orotidine5apos_phosphatedecarboxylase	2.73317	CRC	2.03274	0.0083097		UniRef90_R6QFI1_Phosphoenolpyruvate_proteinphosphotransferase	3.28109	CTR	2.28744	0.00867169		UniRef90_A6L3C5_Xanthinephosphoribosyltransferase	3.02969	CTR	2.09562	0.0033045
UniRef90_C0FPA9_BAAT_acyl_CoAthioesterhydrolaseC_terminaldomainprotein	3.20465	CTR	2.266	0.000328529								UniRef90_Q5LAS7_CrossoverjunctionendodeoxyribonucleaseRuvC	2.70638	CRC	2.03149	0.0147304		UniRef90_A8SHG1_EffluxABCtransporter_permeaseprotein	3.31414	Adenoma	2.28452	0.00928463		UniRef90_J9GSU8_GlycineC_acetyltransferase	3.22107	CTR	2.09379	0.0311731
UniRef90_D4K3M5_Antirestrictionprotein_ArdA_	3.28489	CTR	2.26347	0.00282665								UniRef90_R7DWY8_Peptidechainreleasefactor3	2.92827	CRC	2.03053	0.00676534		UniRef90_C7H957_30SribosomalproteinS16	3.0814	CTR	2.27835	0.0039539		UniRef90_A6L013_Acetylglutamatekinase	3.14206	CTR	2.09215	0.0224456
UniRef90_E2ZNB2_PhageproteinGp37_Gp68	3.05543	CTR	2.26135	5.43556e-05								UniRef90_A6KZH6_Leucine__tRNAligase	2.64817	CRC	2.03033	1.0164e-05		UniRef90_F0R8V1_ProteintranslocasesubunitSecE	2.86654	CTR	2.27395	0.000146042		UniRef90_A6L0S5_Tetraacyldisaccharide4apos_kinase	3.08998	CTR	2.09032	0.0113145
UniRef90_Q79DR3_Beta_lactamase	2.62815	CTR	2.25246	0.00531003								UniRef90_C3QWI4_DNAbindingdomain_excisionasefamily	2.51185	CRC	2.02816	0.0279735		UniRef90_D4JYC0_Orotidine5apos_phosphatedecarboxylase	3.30086	CTR	2.27309	0.0178165		UniRef90_A6KXB4_Apulose_4_phosphatetransketolasesubunitA	3.05027	CTR	2.08885	0.00365468
UniRef90_A8SH98_RNApolymerasesigmafactor_sigma_70family	3.13879	CTR	2.23869	0.0116621								UniRef90_A6KZJ8_Undecaprenyl_diphosphatase	2.74609	CRC	2.02185	0.000599031		UniRef90_E5UVT7_Transposase	2.94976	CTR	2.26553	0.00696659		UniRef90_A6L1Q8_Thymidylatesynthase	3.11098	CTR	2.08815	0.0129788
UniRef90_C7H1I1_Cadmium_exportingATPase	3.07359	CTR	2.23157	0.0001025								UniRef90_Q64MT2_Adenosylhomocysteinase	2.56742	CRC	2.02103	0.000284367		UniRef90_R6PWE5_Cysteinedesulfurase	3.306	CTR	2.26001	0.0185888		UniRef90_A6L3H3_RibonucleaseZ	2.96261	CTR	2.0857	0.00281767
UniRef90_C7H1R8_Site_specificrecombinase_phageintegrasefamily	2.99826	CTR	2.2298	0.000224252								UniRef90_Q5LGR5_50SribosomalproteinL21	2.66963	CRC	2.02061	0.00247146		UniRef90_D4KAH4_Tagaturonatereductase	3.29488	CTR	2.25804	0.0128359		UniRef90_A6L686_GMPsynthase_glutamine_hydrolyzing_	3.11693	CTR	2.08555	0.0250378
UniRef90_R6PT98_ABCtransporterpermeaseprotein	3.15577	CTR	2.2255	0.00137474								UniRef90_B7CEA2_Transposase	2.64585	CRC	2.02041	0.0462167		UniRef90_D4KLV5_EMAPdomain	3.09951	CTR	2.25751	0.0276022		UniRef90_A6L518_Nicotinate_nucleotide__dimethylbenzimidazolephosphoribosyltransferase	2.93085	CTR	2.0853	0.00201228
UniRef90_D4K8W4_BirA_biotin__acetyl_CoA_carboxylase_ligaseregion	3.1523	CTR	2.2255	0.001035								UniRef90_Q8A466_50SribosomalproteinL1	2.65311	CRC	2.01678	0.00410323		UniRef90_D4V649_Conserveddomainprotein	3.03905	CTR	2.2523	0.00325377		UniRef90_A6KZN7_D_aminoacyl_tRNAdeacylase	3.19436	CTR	2.08421	0.0346326
UniRef90_D4K4K4_Predictedintegralmembraneprotein	3.0766	CTR	2.22216	0.000123052								UniRef90_A6KZV1_tRNA_specific2_thiouridylaseMnmA3	2.67427	CRC	2.01169	0.000100501		UniRef90_Q9AE24_TranscriptionalregulatoryproteinRprY	3.16328	CTR	2.24927	0.00917333		UniRef90_A6L5G7_4_hydroxy_tetrahydrodipicolinatesynthase	2.97374	CTR	2.08411	0.0014779
UniRef90_D4K6T6_Transposaseandinactivatedderivatives	3.18124	CTR	2.21909	0.00847575								UniRef90_R5J0A3_ProteintranslocasesubunitSecY	2.64962	CRC	2.00869	0.00100128		UniRef90_D4JYC4_Carbamoyl_phosphatesynthasesmallchain	3.25458	CTR	2.23699	0.0172354		UniRef90_A6KXL0_GTPcyclohydrolase1	3.14219	CTR	2.08385	0.0134211
UniRef90_D4KA97_UDP_N_acetylmuramyl_tripeptidesynthetase	3.11523	CTR	2.21569	0.000801297								UniRef90_A7V2X1_IS66familyelement_transposase	2.77062	CRC	2.00816	0.00954344		UniRef90_D4K117_Signalrecognitionparticleprotein	3.22135	CTR	2.22937	0.0214103		UniRef90_A6KXF7_tRNA_specific2_thiouridylaseMnmA1	3.06133	CTR	2.08373	0.0181344
UniRef90_D4K4K6_CarbohydrateABCtransportermembraneprotein1_CUT1family_TC3_A_1_1___	3.08536	CTR	2.21553	0.000223255								UniRef90_A6KZL1_S_adenosylmethioninesynthase	2.70591	CRC	2.00491	0.000928404		UniRef90_G2T375_Relaxase_mobilizationnucleasefamilyprotein	3.1182	CTR	2.22592	0.00547931		UniRef90_A6L171_NADH_quinoneoxidoreductasesubunitA	3.17705	CTR	2.08339	0.013334
UniRef90_E2ZG33_Polysaccharidebiosynthesisprotein	3.00707	CTR	2.21548	6.08238e-05								UniRef90_Q8A1F6_50SribosomalproteinL34	2.61478	CRC	2.00478	0.00526329		UniRef90_A8S6X1_TranslationinitiationfactorIF_1	3.12824	CTR	2.21736	0.00243462		UniRef90_D4VCG1_Conserveddomainprotein	2.70216	CTR	2.08299	0.0115015
UniRef90_R6PYF5_ABCtransporterpermeaseprotein	3.02122	CTR	2.2137	4.3356e-05								UniRef90_A6L013_Acetylglutamatekinase	2.70611	CRC	2.00449	0.000659085		UniRef90_D4K072_Uronateisomerase	3.19362	CTR	2.21727	0.00877693		UniRef90_A6L227_RibonucleaseY	3.36306	CTR	2.08297	0.0330434
UniRef90_D4KBF8_PredictedZnpeptidase	3.14341	CTR	2.17834	0.0159197								UniRef90_F0R8V1_ProteintranslocasesubunitSecE	2.83665	CRC	2.00394	0.00320185		UniRef90_Q8A8R2_2_3_bisphosphoglycerate_dependentphosphoglyceratemutase1	2.94491	CTR	2.21714	0.000269526		UniRef90_D1PH90_Transposase	2.34254	Adenoma	2.08127	0.0348655
UniRef90_C7HAC3_DNAbindingdomain_excisionasefamily	2.99655	CTR	2.17737	0.000790305								UniRef90_A6KXL0_GTPcyclohydrolase1	2.71699	CRC	2.00313	0.000225641		UniRef90_Q5L8Z8_Malatedehydrogenase	3.16372	CTR	2.21703	0.00794287		UniRef90_A6L4P0_Formate__tetrahydrofolateligase	2.98704	CTR	2.08061	0.00253541
UniRef90_C4ZBU2_50SribosomalproteinL36	3.45132	CTR	2.17312	0.0092803								UniRef90_A6L171_NADH_quinoneoxidoreductasesubunitA	2.76247	CRC	2.00104	0.00539951		UniRef90_Q5LES4_Sulfateadenylyltransferasesubunit2	3.00997	CTR	2.21538	0.00114998		UniRef90_A6KX96_Glycosylhydrolasefamily109protein1	3.05037	CTR	2.0792	0.0128624
UniRef90_D4JZC7_Predictedtranscriptionalregulators	3.00137	CTR	2.17069	0.00127035														UniRef90_R7DWY8_Peptidechainreleasefactor3	3.03734	CTR	2.2096	0.00118914		UniRef90_A6L1M6_5apos_nucleotidaseSurE	3.06524	CTR	2.07884	0.0169506
UniRef90_D4K4F0_DNArepairproteinRadA	3.05394	CTR	2.16564	0.00146115														UniRef90_Q5L8C7_50SribosomalproteinL30	2.97828	CTR	2.20742	0.00241509		UniRef90_C6Z9D8_GDSL_likeprotein	3.03167	CTR	2.07798	0.0071991
UniRef90_G2T375_Relaxase_mobilizationnucleasefamilyprotein	3.1182	CTR	2.16509	0.00269243														UniRef90_R6Q8D0_Methylglyoxalsynthase	3.19953	CTR	2.20525	0.00831069		UniRef90_C3R4F4_Exonuclease	2.96695	CTR	2.07787	0.00367503
UniRef90_D4KYJ2_ABC_typeantimicrobialpeptidetransportsystem_permeasecomponent	3.18482	CTR	2.14959	0.000267777														UniRef90_R5LY84_Deoxyribose_phosphatealdolase	2.94417	CTR	2.20518	0.00091459		UniRef90_A6L0V6_2_C_methyl_D_erythritol2_4_cyclodiphosphatesynthase	3.0974	CTR	2.07776	0.0077348
UniRef90_A8S6A0_BacterialmobilizationproteinMobC	2.98955	CTR	2.1438	0.00156665														UniRef90_R6R868_Pyrimidine_nucleosidephosphorylase	3.20997	CTR	2.20392	0.0391168		UniRef90_A6L391_Maf_likeproteinBVU_2498	2.97298	CTR	2.07655	0.00914632
UniRef90_D4KAY3_ImidazoleglycerolphosphatesynthasesubunitHisF	3.04234	CTR	2.13605	0.000750157														UniRef90_R5K610_Adenylosuccinatelyase	3.14766	CTR	2.20173	0.00499491		UniRef90_A6KXS0_Acetatekinase	3.08661	CTR	2.07582	0.0138752
UniRef90_D4JYU5_Transcriptionalregulator_GntRfamily	3.10932	CTR	2.1275	0.00123298														UniRef90_A6KZ78_Acylcarrierprotein	3.13057	CTR	2.19614	0.00517812		UniRef90_Q5LCV9_Xyloseisomerase	3.19485	CTR	2.07503	0.0181232
UniRef90_R6QGE9_Galactose_1_phosphateuridylyltransferase	3.02215	CTR	2.12704	0.00129076														UniRef90_R6Q519_Methionine__tRNAligase	3.28152	CTR	2.19307	0.040024		UniRef90_A6L3F8_TypeIIIpantothenatekinase	2.9194	CTR	2.07375	0.00252921
UniRef90_D4KTC2_TransposaseDDEdomain	3.1032	CTR	2.11714	0.0106114														UniRef90_A8S6A0_BacterialmobilizationproteinMobC	2.98955	CTR	2.19241	0.00189116		UniRef90_A6L1Z3_HomoserineO_acetyltransferase	3.08369	CTR	2.0736	0.0124877
UniRef90_G2SZ75_50SribosomalproteinL33	2.96633	CTR	2.11174	0.0132559														UniRef90_C4Z2U3_30SribosomalproteinS14typeZ	3.28612	CTR	2.18705	0.0456453		UniRef90_Q89Z59_ProbabletypeIrestrictionenzymeBthVORF4518PMprotein	3.10844	CTR	2.07246	0.010573
UniRef90_R5XIB9_MATEeffluxfamilyprotein	3.14951	CTR	2.1095	0.00130486														UniRef90_R6QEG7_UDP_galactopyranosemutase	3.12948	CTR	2.18565	0.00220959		UniRef90_A6L3K9_DNAreplicationandrepairproteinRecF	2.92694	CTR	2.07229	0.00209782
UniRef90_C0FVR5_Methyl_acceptingchemotaxisproteinsignalingdomainprotein	3.0322	CTR	2.1014	0.0384043														UniRef90_F0R3E4_50SribosomalproteinL3	2.90096	CTR	2.18474	0.000674411		UniRef90_A6L3D5_Demethylmenaquinonemethyltransferase	3.00538	CTR	2.07213	0.0059271
UniRef90_D4L244_FtsHExtracellular	3.04889	CTR	2.09747	0.00337618														UniRef90_R6B7H0_N_acetylmuramoyl_L_alanineamidase	2.94187	CTR	2.18455	0.00424712		UniRef90_A6L5H1_DihydroorotatedehydrogenaseB_NAD_____catalyticsubunit	3.01973	CTR	2.06955	0.00691188
UniRef90_C4ZE08_Peptidedeformylase	3.10656	CTR	2.09724	0.00105984														UniRef90_D9QZL4_TRAGfamilyprotein	3.25496	Adenoma	2.18255	0.0456359		UniRef90_A6KXH3_DNAmismatchrepairproteinMutL	3.02628	CTR	2.06947	0.00955855
UniRef90_D4JXX1_Tryptophanyl_tRNAsynthetase	3.0284	CTR	2.08456	0.002831														UniRef90_R6Q074_Transportpermeaseprotein	3.22012	CTR	2.17967	0.00682485		UniRef90_A6KYN9_Argininosuccinatelyase	3.18198	CTR	2.06892	0.035935
UniRef90_C4Z2U3_30SribosomalproteinS14typeZ	3.28612	CTR	2.07917	0.00400476														UniRef90_R5W667_Meso_diaminopimelateD_dehydrogenase	2.89064	CTR	2.17825	0.000754534		UniRef90_A6L4P5_RibosomalRNAsmallsubunitmethyltransferaseG	2.89854	CTR	2.06772	0.00112104
UniRef90_C0B4K7_ATPase_histidinekinase_DNAgyraseB_HSP90domainprotein	3.09662	CTR	2.07404	0.000272116														UniRef90_D4JZP9_L_lactatedehydrogenase_FMN_dependent_andrelatedalpha_hydroxyaciddehydrogenases	3.14512	CTR	2.17704	0.00583245		UniRef90_A6L7J9_Peptidedeformylase	3.0013	CTR	2.06683	0.00407489
UniRef90_D4KTC1_Transposaseandinactivatedderivatives	3.10282	CTR	2.06691	0.00875708														UniRef90_R6R0N5_S_adenosylmethionine_tRNAribosyltransferase_isomerase	3.04868	CTR	2.17584	0.00259543		UniRef90_A6L532_tRNA1_Val__adenine_37__N6__methyltransferase	2.88444	CTR	2.0653	0.000688614
UniRef90_C4Z954_Glyceraldehyde_3_phosphatedehydrogenase	3.34718	CTR	2.06321	0.000873551														UniRef90_D4K211_Deoxyribose_phosphatealdolase	3.32693	CTR	2.17486	0.0346984		UniRef90_A6L239_UPF0597proteinBVU_2091	3.02214	CTR	2.06512	0.00377496
UniRef90_G2T0I6_Two_componentsensorhistidinekinase	3.09321	CTR	2.05044	0.0498032														UniRef90_R6QBN8_Energy_couplingfactortransporterATP_bindingproteinEcfA	3.23719	CTR	2.17295	0.0133924		UniRef90_A6L6X8_PutativefluorideiontransporterCrcB	3.04478	CTR	2.06291	0.0153047
UniRef90_C4ZB96_30SribosomalproteinS12	3.38198	CTR	2.04599	0.00269978														UniRef90_Q5LAX0_BifunctionalproteinFolD	3.12162	CTR	2.16878	0.00805138		UniRef90_A6L078_RibosomalRNAsmallsubunitmethyltransferaseH	3.06505	CTR	2.06112	0.00922088
UniRef90_C4ZBT7_50SribosomalproteinL15	3.14255	CTR	2.04542	6.92339e-05														UniRef90_D4K2V6_Phosphoribosylformylglycinamidinecyclo_ligase	3.24185	CTR	2.16741	0.0356142		UniRef90_A6L1N4_RibosomalRNAsmallsubunitmethyltransferaseA	3.0326	CTR	2.06083	0.00699984
UniRef90_R6Q4U9_ACTdomainprotein	2.99496	CTR	2.0426	0.00232338														UniRef90_D4JYU5_Transcriptionalregulator_GntRfamily	3.10932	CTR	2.16658	0.0176112		UniRef90_A6L683_tRNAdimethylallyltransferase2	2.938	CTR	2.05687	0.00399771
UniRef90_C4Z929_30SribosomalproteinS16	3.13783	CTR	2.0365	0.000115892														UniRef90_D4K413_ElongationfactorTs	3.19602	CTR	2.16447	0.0154368		UniRef90_A6KZ28_tRNA_specific2_thiouridylaseMnmA2	3.10441	CTR	2.0567	0.0370931
UniRef90_D4LWH2_ABC_typetransportsystem_involvedinlipoproteinrelease_permeasecomponent	3.31906	CTR	2.03066	0.0270735														UniRef90_D7K7T1_ISL3familytransposase	2.77736	CTR	2.16225	0.00360124		UniRef90_A6L6X5_Aminomethyltransferase	3.00843	CTR	2.05538	0.00702555
UniRef90_D4K2E7_Muconatecycloisomerase	2.99936	CTR	2.02732	0.0109495														UniRef90_C7H1R8_Site_specificrecombinase_phageintegrasefamily	2.99826	CTR	2.16225	0.00718665		UniRef90_A6KZK0_S_adenosylmethionine_tRNAribosyltransferase_isomerase	3.14641	CTR	2.05371	0.037115
UniRef90_C7HAT0_UDP_N_acetylglucosamine1_carboxyvinyltransferase	2.97433	CTR	2.0142	0.00570503														UniRef90_R6C6P5_Rubredoxin	3.03364	CTR	2.15769	0.00302789		UniRef90_A6KXB3_Apulose_4_phosphatetransketolasesubunitB	3.05034	CTR	2.05347	0.00908715
UniRef90_D4K148_Fe2_transportsystemproteinA	2.91558	CTR	2.00442	0.0187052														UniRef90_R5U255_L_aspartateoxidase	2.87403	CTR	2.15736	0.000356704		UniRef90_R5W221_Ribose_phosphatepyrophosphokinase	3.12658	CTR	2.05322	0.0495339
UniRef90_C4ZE96_Amidasefromnicotinamidasefamily	3.08287	CTR	2.00146	0.000859686														UniRef90_E2ZNB2_PhageproteinGp37_Gp68	3.05543	CTR	2.15325	0.00190205		UniRef90_A6L5E2_tRNAN6_adenosinethreonylcarbamoyltransferase	2.97615	CTR	2.05151	0.00738537
UniRef90_C2ME56_Integrasecoredomainprotein	3.7248	CRC	3.42158	1.04051e-06														UniRef90_A6KXK3_3_oxoacyl__acyl_carrier_protein_synthase3	2.91133	CTR	2.14839	0.00231143		UniRef90_A6KYJ9_30SribosomalproteinS12	3.20363	CTR	2.05056	0.00391094
UniRef90_P62524_ilvoperonleaderpeptide	3.60679	CRC	3.19549	0.0292241														UniRef90_F0R0T4_FeSassemblyproteinSufB	2.85104	CTR	2.14522	0.000296423		UniRef90_A6L4M1_ATPsynthasesubunitc	2.91062	CTR	2.04829	0.00348219
UniRef90_G8IJI8_Transposase	3.40347	CRC	3.00412	2.31101e-05														UniRef90_C4ZE08_Peptidedeformylase	3.10656	CTR	2.14367	0.0427914		UniRef90_A6L5K0_Aspartatecarbamoyltransferaseregulatorychain	2.95714	CTR	2.04811	0.00524824
UniRef90_W1AQL8_Mobileelementprotein	3.60934	CRC	2.99181	0.0179848														UniRef90_R5MR58_Fe_Smetabolismassociateddomainprotein	2.83224	CTR	2.14193	0.000354712		UniRef90_A6L4M5_ATPsynthasegammachain	2.96913	CTR	2.04656	0.0102615
UniRef90_A8AQG0_DNA_bindingproteinFis	3.27595	CRC	2.87069	0.00263389														UniRef90_D4K2E7_Muconatecycloisomerase	2.99936	CTR	2.13688	0.00970576		UniRef90_A6L083_Deoxyuridine5apos_triphosphatenucleotidohydrolase	3.08327	CTR	2.04613	0.020226
UniRef90_A8AMJ6_30SribosomalproteinS18	3.26767	CRC	2.84562	0.00360388														UniRef90_A6L0E8_Glutamate__tRNAligase	2.87334	CTR	2.13588	0.00118716		UniRef90_A6L7Q8_Glucosamine_6_phosphatedeaminase	3.02503	CTR	2.04604	0.00879562
UniRef90_Q32IP8_IS1ORF1	3.25885	CRC	2.83143	0.00201508														UniRef90_D4KBW2_Mannitol_1_phosphate_altronatedehydrogenases	3.18983	CTR	2.13522	0.0323569		UniRef90_A6L4U5_Altronateoxidoreductase	2.92416	CTR	2.04115	0.00361634
UniRef90_A7ZTI8_50SribosomalproteinL28	3.2306	CRC	2.79609	0.00498313														UniRef90_Q8AA38_ProbabletranscriptionalregulatoryproteinBT_0627	3.05205	CTR	2.13424	0.00474364		UniRef90_E5UZL3_Outermembraneprotein	2.94612	CTR	2.03966	0.00390781
UniRef90_P68768_Cytosolaminopeptidase	3.20388	CRC	2.7492	0.00464583														UniRef90_C0FVR5_Methyl_acceptingchemotaxisproteinsignalingdomainprotein	3.0322	CTR	2.13075	0.0234744		UniRef90_A6L1P6_Cytidylatekinase	3.0085	CTR	2.03776	0.00868847
UniRef90_P0A9P7_ATP_dependentRNAhelicaseDeaD	3.21845	CRC	2.74847	0.00505235														UniRef90_A6L1X1_Adenylosuccinatesynthetase	2.84913	CTR	2.12834	0.000371311		UniRef90_A6L5J5_Probabletransaldolase	2.9766	CTR	2.03631	0.00497004
UniRef90_P0ADE3_UncharacterizedproteinYtfK	3.18412	CRC	2.73775	0.00407008														UniRef90_D4K8W4_BirA_biotin__acetyl_CoA_carboxylase_ligaseregion	3.1523	CTR	2.1215	0.0292267		UniRef90_A6L074_Phospho_N_acetylmuramoyl_pentapeptide_transferase	3.12062	CTR	2.03604	0.0150702
UniRef90_W1I7I5_UnculturedbacteriumextrachromosomalDNARGI01876	3.2877	CRC	2.70919	0.00168735														UniRef90_Q8A9J2_Uronateisomerase	3.03815	CTR	2.1189	0.00492308		UniRef90_A6KWQ7_RiboflavinbiosynthesisproteinRibBA	3.01369	CTR	2.03498	0.0138282
UniRef90_P0AEP2_Galactose_protonsymporter	3.19038	CRC	2.70647	0.00275033														UniRef90_D4K3U9_DAK2domainfusionproteinYloV	3.15599	CTR	2.11726	0.03062		UniRef90_A6L4Y5_Cobyricacidsynthase	2.90677	CTR	2.03212	0.00527817
UniRef90_D1PH90_Transposase	2.91669	CRC	2.62992	0.0134126														UniRef90_R6R074_ATPasecomponentsofABCtransporterswithduplicatedATPasedomains	3.09626	CTR	2.11444	0.00993318		UniRef90_A6L5D2_Potassium_transportingATPasepotassium_bindingsubunit	3.00931	CTR	2.03166	0.0127629
UniRef90_P0CF06_InsertionelementIS1proteinInsA	3.20257	CRC	2.60421	0.00509														UniRef90_Q8A8R5_ATP_dependent6_phosphofructokinase1	2.88293	CTR	2.11144	0.0012505		UniRef90_A6L7P7_Glucose_6_phosphateisomerase	2.96631	CTR	2.03113	0.00621458
UniRef90_D4JXT5_Flavodoxin_likefold	3.57268	CRC	2.60151	0.0412825														UniRef90_Q8A8P0_MobilizationproteinBmgB	2.8954	CTR	2.10366	0.00682967		UniRef90_A6L065_DNArepairproteinRecO	3.06161	CTR	2.02888	0.00871383
UniRef90_D1PDG5_Integrasecoredomainprotein	3.05321	CRC	2.58855	0.00244839														UniRef90_A6L3E7_Dihydroxy_aciddehydratase	2.72663	CTR	2.10244	7.13625e-05		UniRef90_J9H4I8_ProteincontainingDUF1016	2.87442	CTR	2.02641	0.00575805
UniRef90_P0C652_InsertionelementIS1proteinInsA	3.15038	CRC	2.52805	0.00029704														UniRef90_A6KYI4_50SribosomalproteinL24	2.89812	CTR	2.10223	0.00459502		UniRef90_A6L0V2_ElongationfactorTs	3.1276	CTR	2.02412	0.0376451
UniRef90_D1PDG4_IstB_likeATP_bindingprotein	3.01759	CRC	2.52431	0.000919946														UniRef90_R6DH93_Purinenucleosidephosphorylase	2.88857	CTR	2.09908	0.0034091		UniRef90_A6L6X0_50SribosomalproteinL25	3.01821	CTR	2.02272	0.0105463
UniRef90_D1PDZ5_Transposase_IS4family	3.14571	CRC	2.50835	0.00139942														UniRef90_R6QIK7_Branched_chainaminoacidABCtransporterpermeaseprotein	3.16155	CTR	2.09801	0.0330274		UniRef90_A6L4N0_2_aminoethylphosphonate__pyruvatetransaminase	3.03069	CTR	2.0221	0.0188577
UniRef90_P0CF31_InsertionelementIS1proteinInsB	3.0696	CRC	2.48803	0.00181255														UniRef90_P94598_Glutamatedehydrogenase	2.97086	CTR	2.09757	0.00382528		UniRef90_A6L4M3_ATPsynthasesubunitdelta	2.91576	CTR	2.01884	0.00712012
UniRef90_F4XER6_Methyltransferase	3.46371	CRC	2.47858	0.0213538														UniRef90_G2SZ75_50SribosomalproteinL33	2.97397	Adenoma	2.09232	0.0110089		UniRef90_A6KXA6_Histidine__tRNAligase	3.0659	CTR	2.0177	0.0191643
UniRef90_A7ZT30_UniversalstressproteinB	3.05729	CRC	2.42481	0.00282247														UniRef90_A6L0V0_30SribosomalproteinS9	2.80626	CTR	2.08841	0.000540049		UniRef90_A6L7J6_TranslationinitiationfactorIF_3	2.86346	CTR	2.01732	0.0045067
UniRef90_F3PNT7_Relaxase_mobilizationnucleasedomainprotein	3.45794	CRC	2.42289	0.00773387														UniRef90_B0MUW8_Transposase_IS116_IS110_IS902family	2.69335	CTR	2.08697	0.0357515		UniRef90_A6L330_Probableendonuclease4	2.99973	CTR	2.01672	0.0155699
UniRef90_D4JXR3_MutSdomainI	3.45877	CRC	2.41075	0.0479329														UniRef90_F9Z5Q0_FilamentationinducedbycAMPproteinFic	2.85957	CTR	2.0859	0.00181218		UniRef90_A6KWL3_UDP_3_O_acylglucosamineN_acyltransferase	3.10421	CTR	2.01521	0.0481496
UniRef90_B5CT52_30SribosomalproteinS7	3.12436	CRC	2.37165	0.00440855														UniRef90_A6KYI2_30SribosomalproteinS14	2.88987	CTR	2.08308	0.0101136		UniRef90_E5UNN5_Na__Ca2_exchangerprotein	3.09042	CTR	2.01463	0.0459408
UniRef90_D1PDR5_Transposase_IS4family	2.76409	CRC	2.37046	0.042765														UniRef90_D4K4V0_NucleosideABCtransportermembraneprotein	3.18692	CTR	2.08066	0.0255043		UniRef90_A6L0Z9_Adenylatekinase	3.0493	CTR	2.01397	0.021277
UniRef90_E5WU41_ExcisionasefamilyDNAbindingdomain_containingprotein	3.07736	CRC	2.36215	0.044035														UniRef90_E2ZKQ5_Riboflavinsynthase_alphasubunit	3.20242	CTR	2.08004	0.0272615		UniRef90_A6L0Y7_50SribosomalproteinL31typeB	2.87239	CTR	2.01182	0.0462047
UniRef90_R5P6Y2_50SribosomalproteinL22	3.20547	CRC	2.27698	0.0244489														UniRef90_A6L0V1_30SribosomalproteinS2	2.86839	CTR	2.07959	0.00331056		UniRef90_A6L100_GTPaseObg	3.09223	CTR	2.01085	0.0477418
UniRef90_A8SCF8_BacterialmobilizationproteinMobC	3.37083	CRC	2.27356	0.0474296														UniRef90_F0R0T1_Transcriptiontermination_antiterminationproteinNusA	2.8433	CTR	2.07342	0.00155296		UniRef90_A6L0X5_HollidayjunctionATP_dependentDNAhelicaseRuvA	3.08075	CTR	2.00865	0.0261313
UniRef90_I3YJF5_Site_specificrecombinaseXerD	2.90183	CRC	2.26362	0.0449803														UniRef90_D4KBF8_PredictedZnpeptidase	3.14341	CTR	2.07229	0.0398691		UniRef90_A6L5A6_Phosphoserineaminotransferase	2.98371	CTR	2.00717	0.00898207
UniRef90_D6JB22_Predictedprotein	2.95584	CRC	2.26346	0.0361493														UniRef90_D4IN61_Relaxase_Mobilisationnucleasedomain	2.69777	CTR	2.06722	0.0210441		UniRef90_R6X734_Glycosyltransferasegroup1familyprotein	3.07289	CTR	2.0055	0.0200394
UniRef90_Q5L8Z8_Malatedehydrogenase	3.26719	CRC	2.25782	0.00540146														UniRef90_C7HAT0_UDP_N_acetylglucosamine1_carboxyvinyltransferase	2.97433	CTR	2.06388	0.0133222		UniRef90_A6L6X6_PeptidaseT	2.96572	CTR	2.00454	0.00967948
UniRef90_F9Z5H5_Putativetransposase	2.81135	CRC	2.23351	0.0476703														UniRef90_D4K3U5_1_deoxy_D_xylulose5_phosphatereductoisomerase	3.0751	CTR	2.0625	0.0413731		UniRef90_A6L7P5_Lysine__tRNAligase	3.08739	CTR	2.00357	0.0108496
UniRef90_Q5L8B9_50SribosomalproteinL14	3.33541	CRC	2.23268	0.0161996														UniRef90_A6KXL2_Triosephosphateisomerase	2.87578	CTR	2.06136	0.0108304		UniRef90_A6L5L6_MembraneproteininsertaseYidC	2.97227	CTR	2.00271	0.0115477
UniRef90_R6CKR2_Deoxyuridine5apos_triphosphatenucleotidohydrolase	2.76362	CRC	2.2207	0.00717334														UniRef90_D7IXM9_Site_specificrecombinase_resolvasefamily	2.73968	CTR	2.05374	0.00211907		UniRef90_C3REU1_Ribosome_recyclingfactor	3.08754	CTR	2.00258	0.0386972
UniRef90_Q8XBW9_ProteinHokE	2.83462	CRC	2.20212	0.0326861														UniRef90_A6KXY5_N_acetyl_gamma_glutamyl_phosphatereductase	2.79858	CTR	2.04322	0.000867128		UniRef90_A6L6X1_Peptidyl_tRNAhydrolase	3.05046	CTR	2.00145	0.0332811
UniRef90_A6L171_NADH_quinoneoxidoreductasesubunitA	3.01865	CRC	2.17713	0.0155062														UniRef90_A6KYJ8_30SribosomalproteinS7	2.96249	CTR	2.03934	0.00906443
UniRef90_D4IJD3_Acetyl_CoAcarboxylase_carboxyltransferasecomponent_Subunitsalphaandbeta_	2.90639	CRC	2.17441	0.0164844														UniRef90_D4JXX1_Tryptophanyl_tRNAsynthetase	3.0284	CTR	2.03768	0.010916
UniRef90_R6MNH0_CellshapedeterminingproteinMreB_Mrlfamily	3.29992	CRC	2.16905	0.00952606														UniRef90_A0A015Q4W3_Effluxtransporter_outermembranefactor_OMF_lipo_NodTfamilyprotein	2.71855	CTR	2.03265	0.00530065
UniRef90_Q8A320_Integrase	3.00842	CRC	2.16249	0.00606017														UniRef90_A6L686_GMPsynthase_glutamine_hydrolyzing_	2.74436	CTR	2.03194	0.00118481
UniRef90_Q8A475_30SribosomalproteinS10	3.30136	CRC	2.15199	0.0269167														UniRef90_Q5L8W7_30SribosomalproteinS2	2.8977	CTR	2.02779	0.00329014
UniRef90_Q8A319_Integrase	3.01387	CRC	2.15081	0.0272994														UniRef90_Q5LAS7_CrossoverjunctionendodeoxyribonucleaseRuvC	2.838	CTR	2.0246	0.000644906
UniRef90_D1PFM4_Transposase_IS4family	2.85085	CRC	2.1453	0.0329208														UniRef90_A6L5I2_Proline__tRNAligase	2.76934	CTR	2.00975	0.00127521
UniRef90_P94316_NAD_specificglutamatedehydrogenase	3.25132	CRC	2.13221	0.0110416														UniRef90_R5MIX2_60kDachaperonin	2.8545	CTR	2.0064	0.0126737
UniRef90_Q9AE24_TranscriptionalregulatoryproteinRprY	3.243	CRC	2.1307	0.0219848														UniRef90_R6CIY6_1_4_dihydroxy_2_naphthoyl_CoAsynthase	2.80324	CTR	2.00538	0.0020582
UniRef90_R5C195_Glycine__tRNAligase	3.26709	CRC	2.12528	0.0380383														UniRef90_A6KYN9_Argininosuccinatelyase	2.79729	CTR	2.00494	0.000825622
UniRef90_A6L227_RibonucleaseY	3.13187	CRC	2.11604	0.00840202														UniRef90_A6L5E4_50SribosomalproteinL28	2.78564	CTR	2.00383	0.00672859
UniRef90_G8UJ67_ElongationfactorTuGTPbindingdomainprotein	2.85272	CRC	2.11228	0.0313238														UniRef90_R6D9R8_Signalrecognitionparticleprotein	2.79509	CTR	2.00284	0.00139509
UniRef90_R5K610_Adenylosuccinatelyase	3.22701	CRC	2.11094	0.0215908														UniRef90_A6L5J9_Aspartatecarbamoyltransferase	2.72914	CTR	2.00218	0.000972979
UniRef90_R6Y9X7_Diaminopimelatedecarboxylase	2.88427	CRC	2.10441	0.0257526														UniRef90_D4VA22_Putativelipoprotein	2.72605	CTR	2.00147	0.00816147
UniRef90_Q5LES4_Sulfateadenylyltransferasesubunit2	3.10832	CRC	2.08787	0.00995353														UniRef90_A6KWR4_L_rhamnosemutarotase	2.76021	CTR	2.0009	0.00137548
UniRef90_Q5LJ28_S_adenosylmethionine_tRNAribosyltransferase_isomerase	3.04504	CRC	2.08491	0.0109454														UniRef90_I9HVP9_DNAmismatchrepairproteinmutS	2.69243	CTR	2.0006	0.0252897
UniRef90_I3YM16_50SribosomalproteinL3	2.91054	CRC	2.0799	0.0194803
UniRef90_Q5LAX0_BifunctionalproteinFolD	3.199	CRC	2.07723	0.0121219
UniRef90_Q5LI10_Argininosuccinatelyase	3.01024	CRC	2.06521	0.0166114
UniRef90_R6EAH6_50SribosomalproteinL32	2.71261	CRC	2.06215	0.00344252
UniRef90_R5J6I6_Aspartate_semialdehydedehydrogenase	3.01011	CRC	2.06151	0.0153102
UniRef90_Q5L8B2_50SribosomalproteinL2	3.24423	CRC	2.05955	0.0444817
UniRef90_Q5LJ26_S_adenosylmethioninesynthase	3.00284	CRC	2.05817	0.0155806
UniRef90_R6PJS3_Enoyl__acyl_carrier_protein_reductase_NADH_	2.73399	CRC	2.05698	0.0232833
UniRef90_Q5L883_Glutamate__tRNAligase	2.75443	CRC	2.05497	0.000215088
UniRef90_R5JC86_Pyruvate_2_ketoisovaleratefamily2_oxoacid_acceptoroxidoreductasegammasubunit	3.00589	CRC	2.05374	0.00967774
UniRef90_Q8A624_ATP_dependent6_phosphofructokinase2	3.01423	CRC	2.04445	0.00793725
UniRef90_I3YM32_50SribosomalproteinL6	2.8668	CRC	2.04434	0.0299873
UniRef90_Q5LGS0_Aspartate1_decarboxylase	2.99996	CRC	2.04429	0.0137865
UniRef90_Q8A015_BifunctionalenzymeLpxC_FabZ	2.97088	CRC	2.03749	0.0224011
UniRef90_R5U104_2_amino_3_ketobutyratecoenzymeAligase	3.00059	CRC	2.03623	0.00731179
UniRef90_I3YMY0_Transcriptiontermination_antiterminationproteinNusG	2.85644	CRC	2.03256	0.0301888
UniRef90_J9H4P8_Beta_ketoacyl_acyl_carrier_proteinsynthaseII	2.68727	CRC	2.03131	0.000506327
UniRef90_Q64MT2_Adenosylhomocysteinase	2.75018	CRC	2.02809	0.000424866
UniRef90_Q8A4A3_50SribosomalproteinL17	2.66351	CRC	2.02626	0.000639455
UniRef90_Q8A883_Spermidine_putrescineimportATP_bindingproteinPotA	2.62263	CRC	2.02079	0.000457092
UniRef90_P94598_Glutamatedehydrogenase	3.05834	CRC	2.02071	0.0255037
UniRef90_Q5LD96_3_methyl_2_oxobutanoatehydroxymethyltransferase	2.98156	CRC	2.02035	0.0153798
UniRef90_Q8A137_3_oxoacyl__acyl_carrier_protein_synthase3protein2	2.6786	CRC	2.01974	0.00137717
UniRef90_D1PDG3_ISPg3_transposase	2.78958	CRC	2.01696	0.0331266
UniRef90_I3YHS7_Ion_translocatingoxidoreductasecomplexsubunitA	2.81227	CRC	2.01392	0.0247971
UniRef90_R6DCI9_FeSassemblyproteinSufB	2.84711	CRC	2.01273	0.00279354
UniRef90_R5C3D9_ABCtransporterATP_bindingprotein	2.9391	CRC	2.00829	0.0188717
UniRef90_J9BSE3_RNA_directedDNApolymerase_Reversetranscriptase__Fragment_	2.67642	CRC	2.00432	0.0119396
UniRef90_Q8A525_PutativeGMPsynthase_glutamine_hydrolyzing_2	2.80862	CRC	2.0023	0.000237705

## Sheet: Table S3
Enterotype 1, CTR vs. CRC						Enterotype 2, CTR vs. CRC						Enterotype 3, CTR vs. CRC						Enterotype 1, CTR vs. ADN						Enterotype 2, CTR vs. ADN						Enterotype 3, CTR vs. ADN
Pathway	log(MaxAvg)	Group	log(LDA)	pval		Pathway	log(MaxAvg)	Group	log(LDA)	pval		Pathway	log(MaxAvg)	Group	log(LDA)	pval		Pathway	log(MaxAvg)	Group	log(LDA)	pval		Pathway	log(MaxAvg)	Group	log(LDA)	pval		Pathway	log(MaxAvg)	Group	log(LDA)	pval
ILEUSYN_PWY_L_isoleucinebiosynthesisI_fromthreonine_	4.20199	CTR	2.8709	8.21014e-05		PWY_6168_flavinbiosynthesisIII_fungi_	3.82012	CRC	2.32526	0.00522149		PWY_6737_starchdegradationV	4.20439	CTR	2.93748	0.0174338		PWY_7219_adenosineribonucleotidesdenovobiosynthesis	4.35394	Adenoma	2.68469	0.0327244		PWY_6168_flavinbiosynthesisIII_fungi_	4.164	CTR	2.97365	0.02304		ANAGLYCOLYSIS_PWY_glycolysisIII_fromglucose_	3.91442	CTR	2.89096	0.00255327
VALSYN_PWY_L_valinebiosynthesis	4.20199	CTR	2.8709	8.21014e-05		P162_PWY_L_glutamatedegradationV_viahydroxyglutarate_	2.99898	CRC	2.07409	1.51696e-05		PWY_6122_5_aminoimidazoleribonucleotidebiosynthesisII	4.11332	CTR	2.88182	0.00034915		ANAGLYCOLYSIS_PWY_glycolysisIII_fromglucose_	3.95699	CTR	2.66879	0.00192262		PWY_5791_1_4_dihydroxy_2_naphthoatebiosynthesisII_plants_	3.96478	CTR	2.81205	0.00174056		PWY_3841_folatetransformationsII	3.87063	CTR	2.87356	0.00973491
PWY_7111_pyruvatefermentationtoisobutanol_engineered_	4.20187	CTR	2.84358	0.000128647		TRPSYN_PWY_L_tryptophanbiosynthesis	3.60348	CRC	2.15492	0.0287337		PWY_6277_superpathwayof5_aminoimidazoleribonucleotidebiosynthesis	4.11332	CTR	2.88182	0.00034915		FERMENTATION_PWY_mixedacidfermentation	3.34073	Adenoma	2.65196	0.000725977		PWY0_162_superpathwayofpyrimidineribonucleotidesdenovobiosynthesis	4.03455	CTR	2.77663	0.0140345		PWY_1042_glycolysisIV_plantcytosol_	4.0723	CTR	2.87211	0.00733866
GLYCOGENSYNTH_PWY_glycogenbiosynthesisI_fromADP_D_Glucose_	3.80965	CTR	2.8367	1.31208e-06		PWY_6609_adenineandadenosinesalvageIII	3.8114	CRC	2.2636	0.00762589		PWY_7228_superpathwayofguanosinenucleotidesdenovobiosynthesisI	3.878	CRC	2.88174	0.00113192		PWY_4981_L_prolinebiosynthesisII_fromarginine_	3.49943	Adenoma	2.63561	0.00106374		THISYNARA_PWY_superpathwayofthiamindiphosphatebiosynthesisIII_eukaryotes_	3.49018	Adenoma	2.7611	0.0330609		COA_PWY_1_coenzymeAbiosynthesisII_mammalian_	4.1359	CTR	2.84544	0.0498415
PWY_6151_S_adenosyl_L_methioninecycleI	4.14256	CTR	2.82101	0.001357		PWY_5676_acetyl_CoAfermentationtobutanoateII	3.21046	CRC	2.08634	0.000233909		TRNA_CHARGING_PWY_tRNAcharging	4.05025	CTR	2.86969	0.0301911		PWY4FS_8_phosphatidylglycerolbiosynthesisII_non_plastidic_	3.20571	CTR	2.62913	0.00975902		P124_PWY_Bifidobacteriumshunt	3.49017	Adenoma	2.76108	0.0328572		PWY_7664_oleatebiosynthesisIV_anaerobic_	3.18781	Adenoma	2.8452	0.0222996
PWY_6317_galactosedegradationI_Leloirpathway_	3.96096	CTR	2.81851	1.24889e-05		PWY_1269_CMP_3_deoxy_D_manno_octulosonatebiosynthesisI	3.56787	CRC	2.30244	0.043452		PWY_6125_superpathwayofguanosinenucleotidesdenovobiosynthesisII	3.8228	CRC	2.81283	0.000227577		PWY4FS_7_phosphatidylglycerolbiosynthesisI_plastidic_	3.20572	CTR	2.62913	0.00975902		CENTFERM_PWY_pyruvatefermentationtobutanoate	4.17654	CTR	2.74074	0.032453		f_1CMET2_PWY_N10_formyl_tetrahydrofolatebiosynthesis	3.83563	CTR	2.81339	0.0119665
PWY66_422_D_galactosedegradationV_Leloirpathway_	3.96212	CTR	2.81719	1.3541e-05		GLUCONEO_PWY_gluconeogenesisI	3.27593	CRC	2.19843	0.0481869		PWY_6121_5_aminoimidazoleribonucleotidebiosynthesisI	4.08701	CTR	2.8036	0.00397708		PANTO_PWY_phosphopantothenatebiosynthesisI	3.97509	Adenoma	2.59389	0.00142468		PWY4FS_7_phosphatidylglycerolbiosynthesisI_plastidic_	4.17654	CTR	2.74074	0.032453		FASYN_ELONG_PWY_fattyacidelongation__saturated	3.22255	Adenoma	2.76907	0.0244974
PWY_621_sucrosedegradationIII_sucroseinvertase_	3.74134	CTR	2.79984	5.99701e-07		PWY_5971_palmitatebiosynthesisII_bacteriaandplants_	2.97793	CRC	2.025	0.00407643		COMPLETE_ARO_PWY_superpathwayofaromaticaminoacidbiosynthesis	4.14227	CTR	2.76433	0.00419112		PWY_5913_TCAcycleVI_obligateautotrophs_	3.21761	Adenoma	2.57619	0.00110364		COA_PWY_coenzymeAbiosynthesisI	3.67688	Adenoma	2.728	0.0338866		PWY0_862__5Z__dodec_5_enoatebiosynthesis	3.14621	Adenoma	2.73914	0.0230124
ARO_PWY_chorismatebiosynthesisI	4.14339	CTR	2.78533	9.50933e-05		CITRULBIO_PWY_L_citrullinebiosynthesis	3.25326	CRC	2.01099	0.0329207		PWY_7111_pyruvatefermentationtoisobutanol_engineered_	4.17287	CTR	2.75977	0.00982979		PWY0_1586_peptidoglycanmaturation_meso_diaminopimelatecontaining_	3.58311	CTR	2.56858	0.00935342		PWY0_1319_CDP_diacylglycerolbiosynthesisII	4.08085	CTR	2.65829	0.0195538		PHOSLIPSYN_PWY_superpathwayofphospholipidbiosynthesisI_bacteria_	3.56375	Adenoma	2.72724	0.0342371
OANTIGEN_PWY_O_antigenbuildingblocksbiosynthesis_E_coli_	3.60275	CTR	2.77932	9.24953e-08		PWY_6507_4_deoxy_L_threo_hex_4_enopyranuronatedegradation	3.33944	CTR	2.08765	0.0322099		ILEUSYN_PWY_L_isoleucinebiosynthesisI_fromthreonine_	4.17287	CTR	2.74412	0.0130517		PWY_5104_L_isoleucinebiosynthesisIV	3.74798	Adenoma	2.55359	0.029002		PWY_5189_tetrapyrrolebiosynthesisII_fromglycine_	3.84769	CTR	2.65546	0.0236452		PWY_6385_peptidoglycanbiosynthesisIII_mycobacteria_	3.93337	CTR	2.69293	0.0484594
COMPLETE_ARO_PWY_superpathwayofaromaticaminoacidbiosynthesis	4.12201	CTR	2.77604	5.9476e-05		PWY_6151_S_adenosyl_L_methioninecycleI	4.13546	CTR	2.41582	0.0401753		VALSYN_PWY_L_valinebiosynthesis	4.17287	CTR	2.74412	0.0130517		PWY_7117_C4photosyntheticcarbonassimilationcycle_PEPCKtype	3.22966	Adenoma	2.545	0.00222246		PWY_621_sucrosedegradationIII_sucroseinvertase_	3.73297	CTR	2.63762	0.00124646		FASYN_INITIAL_PWY_superpathwayoffattyacidbiosynthesisinitiation_E_coli_	3.09668	Adenoma	2.67967	0.0237448
PWY_6163_chorismatebiosynthesisfrom3_dehydroquinate	4.14183	CTR	2.76687	0.000384846		PWY_6936_seleno_aminoacidbiosynthesis	3.43521	CTR	2.3524	0.00392052		PWY_7664_oleatebiosynthesisIV_anaerobic_	3.11478	CRC	2.73498	0.030611		PWY_5695_uratebiosynthesis_inosine5_phosphatedegradation	3.8819	CTR	2.53358	0.0441894		SO4ASSIM_PWY_sulfatereductionI_assimilatory_	3.73297	CTR	2.63762	0.00124646		PWY_7388_octanoyl__acyl_carrierprotein_biosynthesis_mitochondria_yeast_	3.05752	Adenoma	2.67012	0.0244974
UDPNAGSYN_PWY_UDP_N_acetyl_D_glucosaminebiosynthesisI	3.51813	CTR	2.75948	3.01539e-06		PWY_6892_thiazolebiosynthesisI_E_coli_	3.15477	CTR	2.21747	0.0259463		ARO_PWY_chorismatebiosynthesisI	4.14794	CTR	2.73275	0.00383995		GLYCOGENSYNTH_PWY_glycogenbiosynthesisI_fromADP_D_Glucose_	3.84793	Adenoma	2.51226	0.0462065		PYRIDNUCSAL_PWY_NADsalvagepathwayI	3.97709	CTR	2.63231	0.0172215		PWYG_321_mycolatebiosynthesis	3.17831	Adenoma	2.66977	0.0252706
PWY_6737_starchdegradationV	4.22335	CTR	2.71977	0.0244911								PWY_7208_superpathwayofpyrimidinenucleobasessalvage	3.80989	CRC	2.7238	0.00321659		PWY_7234_inosine_5_phosphatebiosynthesisIII	3.52032	CTR	2.50103	0.00586174		PWY_6859_all_trans_farnesolbiosynthesis	4.0753	CTR	2.63191	0.0117058		COBALSYN_PWY_adenosylcobalaminsalvagefromcobinamideI	3.49835	CTR	2.63495	0.00733866
BRANCHED_CHAIN_AA_SYN_PWY_superpathwayofbranchedaminoacidbiosynthesis	4.04376	CTR	2.71221	0.000994271								PWY_6163_chorismatebiosynthesisfrom3_dehydroquinate	4.15924	CTR	2.71322	0.0126526		PWY_6892_thiazolebiosynthesisI_E_coli_	3.42982	Adenoma	2.48741	0.000662585		PWY_6549_L_glutaminebiosynthesisIII	3.7897	CTR	2.61649	0.00251035		PWY_6282_palmitoleatebiosynthesisI_from_5Z__dodec_5_enoate_	3.15765	Adenoma	2.58169	0.0190166
HISTSYN_PWY_L_histidinebiosynthesis	3.80491	CTR	2.70433	5.05154e-05								DTDPRHAMSYN_PWY_dTDP_L_rhamnosebiosynthesisI	3.96487	CTR	2.65564	0.0262294		PWY_6121_5_aminoimidazoleribonucleotidebiosynthesisI	4.15451	Adenoma	2.4831	0.0232656		P164_PWY_purinenucleobasesdegradationI_anaerobic_	3.74148	CTR	2.58183	0.00419261		PWY_5083_NAD_NADHphosphorylationanddephosphorylation	2.98076	Adenoma	2.50031	0.0283404
PWY_7357_thiaminformationfrompyrithiamineandoxythiamine_yeast_	3.89255	CTR	2.69803	8.35429e-06								PWY_6126_superpathwayofadenosinenucleotidesdenovobiosynthesisII	3.94397	CRC	2.63803	0.0113395		PWY_6163_chorismatebiosynthesisfrom3_dehydroquinate	4.16158	Adenoma	2.47474	0.0322168		PWY_6285_superpathwayoffattyacidsbiosynthesis_E_coli_	3.9175	CTR	2.56249	0.039457		PWY_6519_8_amino_7_oxononanoatebiosynthesisI	3.06236	Adenoma	2.49996	0.0277181
PWY_5103_L_isoleucinebiosynthesisIII	4.01368	CTR	2.68203	0.00250926								PWY_5104_L_isoleucinebiosynthesisIV	3.47156	CTR	2.6287	0.0128506		PWY_5188_tetrapyrrolebiosynthesisI_fromglutamate_	3.74224	Adenoma	2.42613	0.0133755		PWY_6891_thiazolebiosynthesisII_Bacillus_	3.60091	Adenoma	2.55984	0.0426488		BIOTIN_BIOSYNTHESIS_PWY_biotinbiosynthesisI	3.10581	Adenoma	2.49711	0.0252706
NONOXIPENT_PWY_pentosephosphatepathway_non_oxidativebranch_	4.01081	CTR	2.65807	0.00729697								PWY0_1296_purineribonucleosidesdegradation	3.95008	CTR	2.62657	0.0126526		ANAEROFRUCAT_PWY_homolacticfermentation	3.63593	CTR	2.41366	0.0302532		ASPASN_PWY_superpathwayofL_aspartateandL_asparaginebiosynthesis	4.0683	CTR	2.55742	0.0237986		PWY_5189_tetrapyrrolebiosynthesisII_fromglycine_	3.06476	Adenoma	2.48463	0.0056902
PWY_7400_L_argininebiosynthesisIV_archaebacteria_	3.84059	CTR	2.63656	0.0214774								FASYN_ELONG_PWY_fattyacidelongation__saturated	3.14977	CRC	2.61183	0.0301879		PWY_6123_inosine_5_phosphatebiosynthesisI	3.83896	CTR	2.39574	0.0312217		PWY0_1241_ADP_L_glycero_beta__D_manno_heptosebiosynthesis	3.49553	CTR	2.55168	0.0160941		PWY_7383_anaerobicenergymetabolism_invertebrates_cytosol_	3.39324	CTR	2.44583	0.0294622
ARGSYN_PWY_L_argininebiosynthesisI_viaL_ornithine_	3.81131	CTR	2.62356	0.0296967								PWY_7229_superpathwayofadenosinenucleotidesdenovobiosynthesisI	4.02311	CRC	2.60959	0.0277566		COMPLETE_ARO_PWY_superpathwayofaromaticaminoacidbiosynthesis	4.13897	Adenoma	2.38226	0.0376093		f_1CMET2_PWY_N10_formyl_tetrahydrofolatebiosynthesis	3.0693	Adenoma	2.52264	0.0336301		PWY_5345_superpathwayofL_methioninebiosynthesis_bysulfhydrylation_	3.22958	Adenoma	2.44059	0.0332325
PWY_3001_superpathwayofL_isoleucinebiosynthesisI	3.93921	CTR	2.61148	9.68474e-05								PWY_7383_anaerobicenergymetabolism_invertebrates_cytosol_	3.39324	CTR	2.59923	0.000586523		PWY0_1261_anhydromuropeptidesrecycling	3.1875	CTR	2.36313	0.00126382		PWY0_1586_peptidoglycanmaturation_meso_diaminopimelatecontaining_	3.34686	Adenoma	2.51646	0.023798		PWY_5723_Rubiscoshunt	2.97423	Adenoma	2.40993	0.00701959
TRPSYN_PWY_L_tryptophanbiosynthesis	3.77167	CTR	2.60094	0.0067379								PWY0_862__5Z__dodec_5_enoatebiosynthesis	3.07541	CRC	2.59674	0.0319109		GALACT_GLUCUROCAT_PWY_superpathwayofhexuronideandhexuronatedegradation	3.47624	CTR	2.35213	0.0426725		PENTOSE_P_PWY_pentosephosphatepathway	3.11525	Adenoma	2.48952	0.0242145		FERMENTATION_PWY_mixedacidfermentation	2.99114	Adenoma	2.40369	0.0264606
DTDPRHAMSYN_PWY_dTDP_L_rhamnosebiosynthesisI	3.98629	CTR	2.5972	0.00563103								PWY_724_superpathwayofL_lysine_L_threonineandL_methioninebiosynthesisII	4.00503	CTR	2.59115	0.0161707		PWY_7208_superpathwayofpyrimidinenucleobasessalvage	3.72748	Adenoma	2.34797	0.0266328		PWY66_422_D_galactosedegradationV_Leloirpathway_	2.98444	Adenoma	2.46693	0.0303992		FAO_PWY_fattyacidbeta__oxidationI	2.83833	Adenoma	2.35324	0.0031059
ARGSYNBSUB_PWY_L_argininebiosynthesisII_acetylcycle_	3.57804	CTR	2.5864	0.0065896								GLYCOLYSIS_glycolysisI_fromglucose6_phosphate_	3.55644	CRC	2.5698	0.023731		ASPASN_PWY_superpathwayofL_aspartateandL_asparaginebiosynthesis	3.57162	CTR	2.34225	0.00423923		PWY_6305_putrescinebiosynthesisIV	3.25498	Adenoma	2.45488	0.00478571		PWY_5136_fattyacidbeta__oxidationII_peroxisome_	2.77365	Adenoma	2.32157	0.00245336
PWY_6527_stachyosedegradation	3.84264	CTR	2.57277	0.00194227								BRANCHED_CHAIN_AA_SYN_PWY_superpathwayofbranchedaminoacidbiosynthesis	3.9843	CTR	2.54794	0.0240748		P124_PWY_Bifidobacteriumshunt	3.11985	Adenoma	2.22574	0.000744163		CALVIN_PWY_Calvin_Benson_Basshamcycle	3.6365	CTR	2.43914	0.0375955		FUC_RHAMCAT_PWY_superpathwayoffucoseandrhamnosedegradation	2.8631	Adenoma	2.30584	0.0229011
SER_GLYSYN_PWY_superpathwayofL_serineandglycinebiosynthesisI	3.82045	CTR	2.57221	0.00647307								PWY_7184_pyrimidinedeoxyribonucleotidesdenovobiosynthesisI	3.67228	CRC	2.54092	0.0035785		PYRIDNUCSYN_PWY_NADbiosynthesisI_fromaspartate_	3.73175	Adenoma	2.18631	0.0395697		POLYISOPRENSYN_PWY_polyisoprenoidbiosynthesis_E_coli_	2.95619	Adenoma	2.41887	0.0343191		CITRULBIO_PWY_L_citrullinebiosynthesis	2.94702	CTR	2.29521	0.0151339
PWY_5188_tetrapyrrolebiosynthesisI_fromglutamate_	3.68686	CTR	2.51914	0.0122622								FASYN_INITIAL_PWY_superpathwayoffattyacidbiosynthesisinitiation_E_coli_	3.03371	CRC	2.53842	0.0337174		PYRIDOXSYN_PWY_pyridoxal5_phosphatebiosynthesisI	3.16109	CTR	2.14485	0.0393697		HEXITOLDEGSUPER_PWY_superpathwayofhexitoldegradation_bacteria_	3.0132	Adenoma	2.40518	0.0180716		P161_PWY_acetylenedegradation	2.95062	Adenoma	2.29485	0.0484594
PWY_7242_D_fructuronatedegradation	3.54626	CTR	2.51604	0.00371648								PWY_5484_glycolysisII_fromfructose6_phosphate_	3.51541	CRC	2.53442	0.0289519		PWY_5989_stearatebiosynthesisII_bacteriaandplants_	3.2119	CTR	2.1306	0.0346448		SER_GLYSYN_PWY_superpathwayofL_serineandglycinebiosynthesisI	3.60642	CTR	2.40508	0.0293699		PWY_4041_gamma__glutamylcycle	2.73262	Adenoma	2.28488	0.026407
THRESYN_PWY_superpathwayofL_threoninebiosynthesis	3.87198	CTR	2.50872	0.000491467								PWY_7388_octanoyl__acyl_carrierprotein_biosynthesis_mitochondria_yeast_	2.99282	CRC	2.53	0.0328035		PWY_6549_L_glutaminebiosynthesisIII	2.84244	Adenoma	2.11059	7.04961e-06		P105_PWY_TCAcycleIV_2_oxoglutaratedecarboxylase_	3.28453	Adenoma	2.39905	0.0310684		PWY_5913_TCAcycleVI_obligateautotrophs_	2.82635	Adenoma	2.27629	0.0117588
PWY_6123_inosine_5_phosphatebiosynthesisI	3.83896	CTR	2.50423	0.00137097								PWY66_409_superpathwayofpurinenucleotidesalvage	3.44746	CRC	2.51618	0.00294083		COLANSYN_PWY_colanicacidbuildingblocksbiosynthesis	2.92811	CTR	2.1047	0.00986854		PWY_5863_superpathwayofphylloquinolbiosynthesis	3.55648	CTR	2.398	0.0436738		PWY_4984_ureacycle	2.88721	CTR	2.2628	0.0151339
COBALSYN_PWY_adenosylcobalaminsalvagefromcobinamideI	3.57359	CTR	2.4998	0.00170529								PWY_841_superpathwayofpurinenucleotidesdenovobiosynthesisI	3.8013	CRC	2.5122	0.0104772		PWY_5676_acetyl_CoAfermentationtobutanoateII	3.22062	Adenoma	2.09413	0.0183334		PWY_4242_pantothenateandcoenzymeAbiosynthesisIII	3.72978	CTR	2.39482	0.0392201		PWY_6969_TCAcycleV_2_oxoglutarate_ferredoxinoxidoreductase_	3.28441	Adenoma	2.22511	0.0374083
PWY_6124_inosine_5_phosphatebiosynthesisII	3.79318	CTR	2.47198	0.00339727								PWY_7222_guanosinedeoxyribonucleotidesdenovobiosynthesisII	3.68668	CRC	2.50502	0.00621175		PWY_241_C4photosyntheticcarbonassimilationcycle_NADP_MEtype	2.82387	Adenoma	2.08708	0.000970268		NONMEVIPP_PWY_methylerythritolphosphatepathwayI	3.70206	CTR	2.38926	0.0491159		PWY0_1241_ADP_L_glycero_beta__D_manno_heptosebiosynthesis	2.67061	Adenoma	2.22054	0.0302326
CALVIN_PWY_Calvin_Benson_Basshamcycle	4.06965	CTR	2.46295	0.0266308								PWY_7220_adenosinedeoxyribonucleotidesdenovobiosynthesisII	3.68668	CRC	2.50502	0.00621175		HEMESYN2_PWY_hemebiosynthesisII_anaerobic_	2.73254	CTR	2.07842	0.00713009		P185_PWY_formaldehydeassimilationIII_dihydroxyacetonecycle_	3.33645	Adenoma	2.37164	0.0343061		PWY_6803_phosphatidylcholineacylediting	2.70075	Adenoma	2.20588	0.0199686
PWY_5347_superpathwayofL_methioninebiosynthesis_transsulfuration_	3.72409	CTR	2.43243	0.00257108								PWY_7456_mannandegradation	3.43178	CTR	2.49345	0.013877		P164_PWY_purinenucleobasesdegradationI_anaerobic_	3.01059	Adenoma	2.03499	0.00492681		PWY_5154_L_argininebiosynthesisIII_viaN_acetyl_L_citrulline_	3.02701	Adenoma	2.36015	0.0211959		GLYOXYLATE_BYPASS_glyoxylatecycle	2.70402	Adenoma	2.20279	0.0276967
PWY_724_superpathwayofL_lysine_L_threonineandL_methioninebiosynthesisII	4.00632	CTR	2.42984	0.00207177								PWY_3001_superpathwayofL_isoleucinebiosynthesisI	3.86032	CTR	2.479	0.00610827								GLYCOGENSYNTH_PWY_glycogenbiosynthesisI_fromADP_D_Glucose_	2.94411	Adenoma	2.34409	0.0261306		PWY_5505_L_glutamateandL_glutaminebiosynthesis	3.03714	Adenoma	2.15666	0.0432486
PWY_7237_myo__chiro_andscillo_inositoldegradation	3.20414	CTR	2.42775	0.00497927								HISTSYN_PWY_L_histidinebiosynthesis	3.59011	CTR	2.47189	0.023731								HISTSYN_PWY_L_histidinebiosynthesis	2.84823	Adenoma	2.34327	0.013894		REDCITCYC_TCAcycleVIII_helicobacter_	2.67029	Adenoma	2.14339	0.0384452
MET_SAM_PWY_superpathwayofS_adenosyl_L_methioninebiosynthesis	3.76633	CTR	2.41928	0.0258348								PWY_5971_palmitatebiosynthesisII_bacteriaandplants_	3.14955	CRC	2.46955	0.0355718								PWYG_321_mycolatebiosynthesis	2.93124	Adenoma	2.34045	0.0127347		POLYISOPRENSYN_PWY_polyisoprenoidbiosynthesis_E_coli_	2.54356	Adenoma	2.1086	0.00493839
GALACT_GLUCUROCAT_PWY_superpathwayofhexuronideandhexuronatedegradation	3.47624	CTR	2.40168	0.0176331								PWYG_321_mycolatebiosynthesis	3.10164	CRC	2.46704	0.0323546								SULFATE_CYS_PWY_superpathwayofsulfateassimilationandcysteinebiosynthesis	3.10898	Adenoma	2.33046	0.0166499		PWY_7539_6_hydroxymethyl_dihydropterindiphosphatebiosynthesisIII_Chlamydia_	3.08447	Adenoma	2.08667	0.0385194
GLUCUROCAT_PWY_superpathwayofbeta__D_glucuronideandD_glucuronatedegradation	3.49527	CTR	2.40109	0.0178455								PWY_6519_8_amino_7_oxononanoatebiosynthesisI	3.0369	CRC	2.44823	0.0214393								BIOTIN_BIOSYNTHESIS_PWY_biotinbiosynthesisI	3.69177	Adenoma	2.32091	0.0211651		PWY_7115_C4photosyntheticcarbonassimilationcycle_NAD_MEtype	2.59335	Adenoma	2.06178	0.0199436
PWY_7234_inosine_5_phosphatebiosynthesisIII	3.52032	CTR	2.39928	0.0242112								PWY_6545_pyrimidinedeoxyribonucleotidesdenovobiosynthesisIII	3.64665	CRC	2.44583	0.00259094								PWY_7663_gondoatebiosynthesis_anaerobic_	3.27029	Adenoma	2.28455	0.0196833		PWY_5173_superpathwayofacetyl_CoAbiosynthesis	2.53115	Adenoma	2.01097	0.0392723
METSYN_PWY_L_homoserineandL_methioninebiosynthesis	3.74402	CTR	2.39886	0.0197041								BIOTIN_BIOSYNTHESIS_PWY_biotinbiosynthesisI	3.0849	CRC	2.43841	0.0185036								PWY_5177_glutaryl_CoAdegradation	2.79525	Adenoma	2.2607	0.0312005
PWY_5659_GDP_mannosebiosynthesis	3.64876	CTR	2.39125	0.0190164								PWY_6282_palmitoleatebiosynthesisI_from_5Z__dodec_5_enoate_	3.09022	CRC	2.41836	0.0233889								PWY_6147_6_hydroxymethyl_dihydropterindiphosphatebiosynthesisI	3.02955	Adenoma	2.25007	0.0248852
PWY_6507_4_deoxy_L_threo_hex_4_enopyranuronatedegradation	3.49184	CTR	2.39047	0.021145								THRESYN_PWY_superpathwayofL_threoninebiosynthesis	3.78462	CTR	2.38029	0.0464969								FOLSYN_PWY_superpathwayoftetrahydrofolatebiosynthesisandsalvage	2.99446	Adenoma	2.24391	0.0456339
THISYNARA_PWY_superpathwayofthiamindiphosphatebiosynthesisIII_eukaryotes_	3.60749	CTR	2.38329	0.00437673								PWY_6168_flavinbiosynthesisIII_fungi_	3.69898	CRC	2.3515	0.020222								PWY_6590_superpathwayofClostridiumacetobutylicumacidogenicfermentation	2.86667	Adenoma	2.23613	0.0253425
GALACTUROCAT_PWY_D_galacturonatedegradationI	3.49666	CTR	2.3724	0.0188665								PWY0_1297_superpathwayofpurinedeoxyribonucleosidesdegradation	3.23019	CRC	2.32407	0.00907085								PWY_7003_glyceroldegradationtobutanol	2.7713	Adenoma	2.17794	0.0352687
HOMOSER_METSYN_PWY_L_methioninebiosynthesisI	3.57433	CTR	2.36374	0.0173534								PWY_6113_superpathwayofmycolatebiosynthesis	3.06212	CRC	2.30878	0.0446555								PWY_7198_pyrimidinedeoxyribonucleotidesdenovobiosynthesisIV	2.78129	Adenoma	2.17506	0.0492691
PWY_5304_superpathwayofsulfuroxidation_Acidianusambivalens_	3.11255	CTR	2.3103	0.0107574								PWY_2941_L_lysinebiosynthesisII	3.41746	CRC	2.3079	0.0314757								PWY_6608_guanosinenucleotidesdegradationIII	2.72052	Adenoma	2.14847	0.0363178
PWY_5367_petroselinatebiosynthesis	3.20955	CTR	2.25481	0.0113233								PWY_7197_pyrimidinedeoxyribonucleotidephosphorylation	3.57156	CRC	2.29472	0.0386241								PWY_5723_Rubiscoshunt	2.72052	Adenoma	2.14847	0.0363178
PWY0_1298_superpathwayofpyrimidinedeoxyribonucleosidesdegradation	3.1476	CTR	2.21664	0.00927211								PWY_6147_6_hydroxymethyl_dihydropterindiphosphatebiosynthesisI	3.22329	CRC	2.26751	0.0346565								NONOXIPENT_PWY_pentosephosphatepathway_non_oxidativebranch_	2.72052	Adenoma	2.14847	0.0363178
PWY_6609_adenineandadenosinesalvageIII	3.83274	CTR	2.16429	0.0129968								PWY_6353_purinenucleotidesdegradationII_aerobic_	3.27083	CRC	2.25503	0.0346562								PWY_7187_pyrimidinedeoxyribonucleotidesdenovobiosynthesisII	2.72052	Adenoma	2.14847	0.0363178
PWY_6471_peptidoglycanbiosynthesisIV_Enterococcusfaecium_	2.81104	CTR	2.10234	0.00339757								FOLSYN_PWY_superpathwayoftetrahydrofolatebiosynthesisandsalvage	2.95189	CRC	2.25186	0.0136649								NAD_BIOSYNTHESIS_II_NADsalvagepathwayII	2.80999	Adenoma	2.14378	0.0307547
PYRIDNUCSAL_PWY_NADsalvagepathwayI	3.14904	CTR	2.08814	0.0147629								PWY_6612_superpathwayoftetrahydrofolatebiosynthesis	2.83324	CRC	2.20181	0.0140921								PWY_6595_superpathwayofguanosinenucleotidesdegradation_plants_	2.75747	Adenoma	2.12909	0.0363547
HISDEG_PWY_L_histidinedegradationI	3.40317	CRC	2.78237	1.22813e-07								PWY_7539_6_hydroxymethyl_dihydropterindiphosphatebiosynthesisIII_Chlamydia_	3.12278	CRC	2.18361	0.0145376								PWY0_166_superpathwayofpyrimidinedeoxyribonucleotidesdenovobiosynthesis_E_coli_	2.638	Adenoma	2.0583	0.0347021
GLYCOLYSIS_glycolysisI_fromglucose6_phosphate_	3.58372	CRC	2.77417	1.43851e-05								PWY_5189_tetrapyrrolebiosynthesisII_fromglycine_	2.92147	CRC	2.1706	0.0103927								PWY_5030_L_histidinedegradationIII	2.62734	Adenoma	2.02848	0.0449594
PWY_5695_uratebiosynthesis_inosine5_phosphatedegradation	3.93928	CRC	2.72727	8.41434e-05								FERMENTATION_PWY_mixedacidfermentation	2.94497	CRC	2.15843	0.0118834
PWY_7229_superpathwayofadenosinenucleotidesdenovobiosynthesisI	3.99799	CRC	2.72615	0.000258678								HEMESYN2_PWY_hemebiosynthesisII_anaerobic_	2.9125	CRC	2.15454	0.0319142
PWY_5484_glycolysisII_fromfructose6_phosphate_	3.5415	CRC	2.72316	1.3817e-05								GLYCOLYSIS_E_D_superpathwayofglycolysisandEntner_Doudoroff	3.0952	CRC	2.12248	0.0435427
PWY66_400_glycolysisVI_metazoan_	3.53968	CRC	2.71537	0.000315915								PWY_7210_pyrimidinedeoxyribonucleotidesbiosynthesisfromCTP	2.73895	CRC	2.0636	0.0123327
PWY_6126_superpathwayofadenosinenucleotidesdenovobiosynthesisII	3.91733	CRC	2.7061	0.000391366								PWY_5913_TCAcycleVI_obligateautotrophs_	2.76172	CRC	2.02772	0.0344084
PWY_7663_gondoatebiosynthesis_anaerobic_	3.72537	CRC	2.69244	7.43927e-05								PWY_7198_pyrimidinedeoxyribonucleotidesdenovobiosynthesisIV	2.63011	CRC	2.01643	0.0129222
PWY_5973_cis_vaccenatebiosynthesis	3.78053	CRC	2.67159	0.000225216
ANAEROFRUCAT_PWY_homolacticfermentation	3.7128	CRC	2.65025	4.45099e-05
PWY0_845_superpathwayofpyridoxal5_phosphatebiosynthesisandsalvage	3.41171	CRC	2.64832	2.47615e-05
PWY_6897_thiaminsalvageII	3.67567	CRC	2.63686	0.000120426
PWY_7228_superpathwayofguanosinenucleotidesdenovobiosynthesisI	3.6977	CRC	2.63154	5.99129e-06
PYRIDOXSYN_PWY_pyridoxal5_phosphatebiosynthesisI	3.34313	CRC	2.61536	5.7254e-06
THISYN_PWY_superpathwayofthiamindiphosphatebiosynthesisI	3.54516	CRC	2.609	3.45476e-06
PWY66_399_gluconeogenesisIII	3.36731	CRC	2.60712	7.53409e-07
CENTFERM_PWY_pyruvatefermentationtobutanoate	2.76723	CRC	2.59041	0.0238356
PWY_6700_queuosinebiosynthesis	3.95662	CRC	2.58967	0.0197041
PWY_6125_superpathwayofguanosinenucleotidesdenovobiosynthesisII	3.68267	CRC	2.58215	5.62619e-06
GLUCONEO_PWY_gluconeogenesisI	3.36924	CRC	2.55313	1.94138e-05
PWY_7222_guanosinedeoxyribonucleotidesdenovobiosynthesisII	3.66923	CRC	2.54711	0.000222619
PWY_7220_adenosinedeoxyribonucleotidesdenovobiosynthesisII	3.66923	CRC	2.54711	0.000222619
PWY_6385_peptidoglycanbiosynthesisIII_mycobacteria_	3.93954	CRC	2.53642	0.0466195
P42_PWY_incompletereductiveTCAcycle	3.33235	CRC	2.53262	3.67561e-05
PWY_6590_superpathwayofClostridiumacetobutylicumacidogenicfermentation	2.85829	CRC	2.53019	0.0249569
PWY_1269_CMP_3_deoxy_D_manno_octulosonatebiosynthesisI	3.25206	CRC	2.52333	1.69273e-07
RIBOSYN2_PWY_flavinbiosynthesisI_bacteriaandplants_	3.4163	CRC	2.50646	0.000466319
PWY_7184_pyrimidinedeoxyribonucleotidesdenovobiosynthesisI	3.56848	CRC	2.49911	2.2592e-05
PWY_7282_4_amino_2_methyl_5_phosphomethylpyrimidinebiosynthesis_yeast_	3.56192	CRC	2.49132	0.00779412
PWY0_166_superpathwayofpyrimidinedeoxyribonucleotidesdenovobiosynthesis_E_coli_	3.69972	CRC	2.47883	6.41014e-05
PWY_6168_flavinbiosynthesisIII_fungi_	3.66681	CRC	2.47607	0.00109805
PWY_7383_anaerobicenergymetabolism_invertebrates_cytosol_	3.45608	CRC	2.42192	0.00272518
PWY_6608_guanosinenucleotidesdegradationIII	3.52461	CRC	2.41967	0.0128362
PWY_6703_preQ0biosynthesis	3.78835	CRC	2.41748	0.0104505
PWY_841_superpathwayofpurinenucleotidesdenovobiosynthesisI	3.74618	CRC	2.40764	0.0009044
PWY_7197_pyrimidinedeoxyribonucleotidephosphorylation	3.46934	CRC	2.4036	5.80057e-05
ARGININE_SYN4_PWY_L_ornithinedenovobiosynthesis	3.28065	CRC	2.40219	0.00100466
PWY_5030_L_histidinedegradationIII	3.06543	CRC	2.38469	0.000738851
PHOSLIPSYN_PWY_superpathwayofphospholipidbiosynthesisI_bacteria_	3.35665	CRC	2.37472	0.0223283
TCA_TCAcycleI_prokaryotic_	3.27685	CRC	2.34239	0.004438
CITRULBIO_PWY_L_citrullinebiosynthesis	2.94191	CRC	2.34212	1.11372e-06
PWY_6969_TCAcycleV_2_oxoglutarate_ferredoxinoxidoreductase_	3.24562	CRC	2.33527	0.00156504
PWY_5154_L_argininebiosynthesisIII_viaN_acetyl_L_citrulline_	3.31244	CRC	2.33398	0.00550488
DENOVOPURINE2_PWY_superpathwayofpurinenucleotidesdenovobiosynthesisII	3.72615	CRC	2.32899	0.00292966
BIOTIN_BIOSYNTHESIS_PWY_biotinbiosynthesisI	2.89362	CRC	2.32442	0.0182
PWY_6147_6_hydroxymethyl_dihydropterindiphosphatebiosynthesisI	3.20191	CRC	2.32197	0.00108667
PWY_6519_8_amino_7_oxononanoatebiosynthesisI	2.8447	CRC	2.30206	0.0219795
PWY_6545_pyrimidinedeoxyribonucleotidesdenovobiosynthesisIII	3.50442	CRC	2.30094	0.000510778
PWY_7323_superpathwayofGDP_mannose_derivedO_antigenbuildingblocksbiosynthesis	2.97447	CRC	2.29266	0.00156798
P162_PWY_L_glutamatedegradationV_viahydroxyglutarate_	2.9211	CRC	2.27152	2.90379e-08
PWY_7187_pyrimidinedeoxyribonucleotidesdenovobiosynthesisII	3.71469	CRC	2.27022	0.00876647
PWY_4984_ureacycle	2.85717	CRC	2.25844	5.09944e-06
P161_PWY_acetylenedegradation	3.00117	CRC	2.25567	0.0205741
P441_PWY_superpathwayofN_acetylneuraminatedegradation	3.23992	CRC	2.25084	0.00175748
PWY_5690_TCAcycleII_plantsandfungi_	3.14471	CRC	2.24788	0.00322408
COLANSYN_PWY_colanicacidbuildingblocksbiosynthesis	3.05772	CRC	2.24366	0.0034281
PWY_5345_superpathwayofL_methioninebiosynthesis_bysulfhydrylation_	3.13045	CRC	2.22764	0.0153143
PWY_7539_6_hydroxymethyl_dihydropterindiphosphatebiosynthesisIII_Chlamydia_	3.0715	CRC	2.20464	0.000519268
PWY_5676_acetyl_CoAfermentationtobutanoateII	3.23897	CRC	2.19568	0.000677959
GLYCOLYSIS_E_D_superpathwayofglycolysisandEntner_Doudoroff	3.09165	CRC	2.18071	0.000420828
SULFATE_CYS_PWY_superpathwayofsulfateassimilationandcysteinebiosynthesis	3.14033	CRC	2.175	0.0298075
PWY_6901_superpathwayofglucoseandxylosedegradation	3.25635	CRC	2.13015	0.0472736
PWY_5505_L_glutamateandL_glutaminebiosynthesis	2.93135	CRC	2.09375	0.000480724
FUCCAT_PWY_fucosedegradation	2.93188	CRC	2.09255	0.00653096
P164_PWY_purinenucleobasesdegradationI_anaerobic_	3.00247	CRC	2.0872	0.00339726
P108_PWY_pyruvatefermentationtopropanoateI	2.65252	CRC	2.03891	0.0104207
PWY_5022_4_aminobutanoatedegradationV	2.67618	CRC	2.01745	0.00258388
GLUDEG_I_PWY_GABAshunt	2.62164	CRC	2.0144	0.00570953
FAO_PWY_fattyacidbeta__oxidationI	2.81006	CRC	2.00128	0.0460452

## Sheet: Table S4
Enterotype 1					Enterotype 2					Enterotype 3
Age_ALL_n551	ADN (rho)	CRC (rho)	CTR (rho)		Age_ALL_n695	ADN (rho)	CRC (rho)	CTR (rho)		Age_ALL_n226	ADN (rho)	CRC (rho)	CTR (rho)
s__Streptococcus_mutans	0.0816919	0.200947	0.209434		s__Eubacterium_eligens	0.258649	0.10877	0.222642		s__Rothia_mucilaginosa	0.344845	0.331974	0.39787
s__Bifidobacterium_animalis	-0.010449	0.0730882	0.189975		s__Fusobacterium_nucleatum	0.0821998	0.14659	0.19185		s__Lactobacillus_ruminis		-0.0270127	-0.356762
s__Solobacterium_moorei	0.175291	0.0433828	0.176213		s__Phascolarctobacterium_succinatutens	0.136066	-0.026766	0.175456		s__Parabacteroides_distasonis	0.0822964	-0.256105	0.320226
s__Lactobacillus_casei_paracasei	-0.058852	-0.0204512	0.158013		s__Prevotella_buccae	-0.106434	0.0105821	0.145775		s__Veillonella_parvula	0.0433167	0.25738	0.314838
s__Coprococcus_comes	0.183633	0.0176341	-0.14282		s__Ruminococcus_sp_5_1_39BFAA	0.0279006	-0.0297804	0.132657		s__Bifidobacterium_angulatum			-0.312973
s__Collinsella_aerofaciens	0.135411	-0.0618785	-0.133821		s__Solobacterium_moorei	0.0131814	0.113421	0.110302		s__Streptococcus_mitis_oralis_pneumoniae	-0.165372	0.265639	0.228556
s__Peptostreptococcus_stomatis	0.252482	-0.0483116	0.0476772		s__Roseburia_intestinalis	0.0533939	0.143176	0.0743695		s__Ruminococcus_gnavus	-0.588909	0.0678685	0.208357
s__Peptostreptococcus_anaerobius	0.0192582	-0.205736	0.0336373		s__Bacteroides_nordii	0.260481	0.0467484	0.053106		s__Eubacterium_eligens	0.214786	0.0437369	0.200417
s__Methanobrevibacter_smithii	0.141855	0.2406	-0.0312346		s__Peptostreptococcus_anaerobius	0.193997	-0.167878	-0.0240155		s__Gemella_morbillorum	0.0690938	0.219143	-0.104301
s__Clostridiales_bacterium_1_7_47FAA	-0.214633	0.00710323	-0.000513945		s__Odoribacter_splanchnicus	-0.050276	-0.16943	0.0182326		s__Porphyromonas_uenonis		-0.266225	0.0989328
Age_28-40_n16	ADN (rho)	CRC (rho)	CTR (rho)		Age_28-40_n30	ADN (rho)	CRC (rho)	CTR (rho)		s__Parvimonas_micra	0.268876	0.263894	0.09083
s__Clostridium_symbiosum		-0.921053	0.218243		s__Eubacterium_eligens		0.0769259	-0.447272		s__Solobacterium_moorei	0.0161441	0.236194	-0.0538836
s__Parvimonas_micra		-0.917663			s__Bifidobacterium_pseudocatenulatum		0.454319	-0.464851		s__Prevotella_intermedia		0.317683	#N/A
s__Streptococcus_thermophilus		-0.917663	-0.204335		Age_41-50_n75	ADN (rho)	CRC (rho)	CTR (rho)		Age_28-40_n19	ADN (rho)	CRC (rho)	CTR (rho)
s__Solobacterium_moorei		-0.917663	-0.134371		s__Clostridium_symbiosum	-0.666886	0.20706	0.454557		s__Ruminococcus_gnavus			0.612563
s__Peptostreptococcus_stomatis		-0.917663			s__Parvimonas_micra		0.289456	0.403115		s__Lactobacillus_ruminis			-0.48154
Age_41-50_n59	ADN (rho)	CRC (rho)	CTR (rho)		s__Gemella_morbillorum		0.323747	0.325158		s__Ruminococcus_torques			0.571707
s__Peptostreptococcus_stomatis		-0.365839	0.389267		s__Ruminococcus_torques	0.359092	0.455242	0.130589		s__Clostridium_symbiosum			0.469556
s__Parvimonas_micra	0.355784	-0.187203	0.389267		Age_51-60_n170	ADN (rho)	CRC (rho)	CTR (rho)		s__Prevotella_copri			-0.499759
s__Roseburia_intestinalis	0.32373	-0.282923	0.363154		s__Anaerotruncus_colihominis	0.138371	0.0900273	0.276579		Age_41-50_n18	ADN (rho)	CRC (rho)	CTR (rho)
s__Adlercreutzia_equolifaciens	-0.0805143	0.514517	-0.167551		s__Parvimonas_micra	-0.136326	0.0801722	0.257357		s__Fusobacterium_mortiferum	1	0.800629
s__Ruminococcus_torques	-0.284897	-0.541158	-0.105516		s__Ruminococcus_torques	0.0311102	-0.258413	0.127436		s__Parvimonas_micra		-0.741469	0
Age_51-60_n110	ADN	CRC	CTR		Age_61-70_n259	ADN (rho)	CRC (rho)	CTR (rho)		s__Gemella_morbillorum		-0.741469
s__Streptococcus_mutans	0.0816919	0.200947	0.209434		s__Alistipes_indistinctus	-0.141749	0.0230146	-0.293364		s__Porphyromonas_uenonis		-0.741469
s__Bifidobacterium_animalis	-0.010449	0.0730882	0.189975		s__Fusobacterium_nucleatum	-0.271829	0.128877	0.29039		s__Bacteroidales_bacterium_ph8		-0.555598	-0.944911
s__Solobacterium_moorei	0.175291	0.0433828	0.176213		s__Bacteroides_nordii	-0.0797272	0.0136027	-0.219626		Age_51-60_n47	ADN (rho)	CRC (rho)	CTR (rho)
s__Lactobacillus_casei_paracasei	-0.058852	-0.0204512	0.158013		s__Holdemania_filiformis	0.141475	0.181402	-0.124786		s__Ruminococcus_torques	-0.945611	-0.0321168	-0.0276684
s__Coprococcus_comes	0.183633	0.0176341	-0.14282		Age_71-80_n141	ADN (rho)	CRC (rho)	CTR (rho)		Age_61-70_n85	ADN (rho)	CRC (rho)	CTR (rho)
s__Collinsella_aerofaciens	0.135411	-0.0618785	-0.133821		s__Eubacterium_biforme	0.160396	-0.246966	0.126057		s__Veillonella_parvula	0.185199	-0.0546509	0.363588
s__Peptostreptococcus_stomatis	0.252482	-0.0483116	0.0476772		s__Prevotella_nigrescens		-0.0518682	0.301591		s__Eubacterium_eligens	-0.487821	0.166473	0.433148
s__Peptostreptococcus_anaerobius	0.0192582	-0.205736	0.0336373		s__Odoribacter_splanchnicus	0.15252	-0.258552	0.0473317		s__Parabacteroides_distasonis	0.0969715	-0.320449	0.0737554
s__Methanobrevibacter_smithii	0.141855	0.2406	-0.0312346		s__Ruminococcus_sp_5_1_39BFAA	0.0238089	-0.294297	-0.0726895		Age_71-80_n49	ADN (rho)	CRC (rho)	CTR (rho)
s__Clostridiales_bacterium_1_7_47FAA	-0.214633	0.00710323	-0.000513945		Age_81-90_n14	ADN (rho)	CRC (rho)	CTR (rho)		s__Prevotella_intermedia		0.446821
Age_61-70_n206	ADN (rho)	CRC (rho)	CTR (rho)		s__Eubacterium_ventriosum		0.607864			s__Ruminococcus_gnavus	0.641689	-0.550208	-0.0677533
s__Ruminococcus_torques	-0.183455	-0.153134	-0.206091		BMI_ALL_n695	ADN (rho)	CRC (rho)	CTR (rho)		s__Gemella_morbillorum	0.320844	0.504457
s__Porphyromonas_somerae	0.185071	-0.340158	-0.0658022		s__Phascolarctobacterium_succinatutens	-0.165271	0.0243292	0.136958		s__Bacteroidales_bacterium_ph8	-0.0748481	-0.0889654	0.590718
s__Haemophilus_parainfluenzae	0.299578	0.139743	0.0576159		s__Ruminococcus_sp_5_1_39BFAA	-0.00773986	0.111438	0.133632		BMI_ALL_n226	ADN (rho)	CRC (rho)	CTR (rho)
s__Streptococcus_salivarius	-0.0529645	0.292826	-0.0436041		s__Ruminococcus_torques	0.141607	0.0356052	0.120036		s__Streptococcus_mitis_oralis_pneumoniae	-0.0731676	0.111934	0.236448
s__Parabacteroides_goldsteinii	-0.0626226	-0.284993	-0.0366497		s__Solobacterium_moorei	-0.347614	-0.0571849	0.105755		s__Ruminococcus_torques	-0.0995869	0.135428	0.206958
s__Lachnospiraceae_bacterium_7_1_58FAA	-0.00925258	-0.263353	0.035266		s__Prevotella_stercorea	-0.107503	-0.139546	0.0870049		s__Solobacterium_moorei	0	0.124211	0.22221
Age_71-80_n100	ADN (rho)	CRC (rho)	CTR (rho)		s__Prevotella_nigrescens		-0.110627	-0.0141525		s__Prevotella_copri	0.0313112	0.296975	-0.117863
s__Lachnospiraceae_bacterium_3_1_57FAA_CT1	0.00754347	0.16276	-0.33195		s__Morganella_morganii		0.0264508	-0.143069		BMI_normal_n147	ADN (rho)	CRC (rho)	CTR (rho)
s__Ruminococcus_sp_5_1_39BFAA	0.654038	0.0297054	-0.292321		s__Bifidobacterium_pseudocatenulatum	-0.0800847	-0.065371	-0.164825		s__Rothia_mucilaginosa	-0.11532	0.254635	-0.166407
s__Lachnospiraceae_bacterium_7_1_58FAA	-0.0850616	0.360431	-0.188523		s__Clostridium_symbiosum	0.0343522	-0.0654174	-0.174157		s__Peptostreptococcus_stomatis	0.0935535	0.00860183	-0.257285
s__Porphyromonas_somerae	0.28217	0.344472			BMI_low_n38	ADN (rho)	CRC (rho)	CTR (rho)		s__Prevotella_copri	-0.192857	0.252814	-0.0562412
Age_81-90_n19	ADN (rho)	CRC (rho)	CTR (rho)		s__Bacteroides_nordii		-0.0398133	-0.536032		BMI_overweight_n48	ADN (rho)	CRC (rho)	CTR (rho)
s__Methanobrevibacter_smithii	1	0.411032	1		s__Alistipes_indistinctus		-0.525644	-0.0905697		s__Parabacteroides_distasonis	0	-0.17231	-0.440184
s__Parabacteroides_merdae	1	-0.257595	-1		s__Eggerthella_lenta	1	-0.511519	-0.245572		BMI_obese_n16	ADN (rho)	CRC (rho)	CTR (rho)
s__Coprococcus_comes	1	-0.173597	1		BMI_normal_n455	ADN (rho)	CRC (rho)	CTR (rho)		s__Rothia_mucilaginosa	1	-0.257143
s__Ruminococcus_sp_5_1_39BFAA	-1	0.112129	1		s__Odoribacter_splanchnicus	-0.0871329	-0.142647	-0.113574		s__Bacteroidales_bacterium_ph8	1	-0.540899	0.0180187
s__Lachnospiraceae_bacterium_7_1_58FAA	1	0.0851184	-1		s__Clostridium_symbiosum	0.109085	-0.0536839	-0.143369
s__Eubacterium_eligens	1	-0.0850248	1		s__Prevotella_buccae	0.002307	-0.149494	-0.0291616
s__Streptococcus_salivarius	-1	0.0404531	1		s__Holdemania_filiformis	0.368997	0.0449652	0.0508883
BMI_ALL_n551	ADN (rho)	CRC (rho)	CTR (rho)		s__Phascolarctobacterium_succinatutens	-0.0671368	0.078528	0.14871
s__Haemophilus_parainfluenzae	-0.326777	-0.277428	-0.332582		BMI_overweight_n155	ADN (rho)	CRC (rho)	CTR (rho)
s__Parvimonas_micra	-0.2604	-0.0199819	-0.0518502		s__Bacteroides_nordii	-0.092382	0.325606	-0.293516
s__Odoribacter_splanchnicus	-0.245579	-0.10879	-0.0601929		s__Alistipes_indistinctus	0.0825279	0.13428	-0.303977
s__Odoribacter_splanchnicus.1	-0.245579	-0.10879	-0.0601929		BMI_obese_n30	ADN (rho)	CRC (rho)	CTR (rho)
s__Parabacteroides_goldsteinii	-0.196546	-0.253868	-0.181535		s__Phascolarctobacterium_succinatutens	0.135225	0.309214	-0.812777
s__Lachnospiraceae_bacterium_7_1_58FAA	-0.144407	-0.158392	-0.103269
s__Eubacterium_eligens	-0.138998	-0.203346	-0.323797
s__Ruminococcus_champanellensis	-0.127028	0.00689082	-0.140663
s__Parabacteroides_distasonis	-0.0895827	-0.242209	-0.0589212
s__Alistipes_indistinctus	-0.0662854	-0.176148	-0.126524
s__Actinomyces_sp_ICM47	0.0232393	-0.0668973	0.128991
s__Collinsella_aerofaciens	0.0853408	0.193346	0.180086
s__Streptococcus_thermophilus	0.102887	0.0944547	0.178955
s__Eubacterium_hallii	0.15461	0.288158	0.268859
s__Porphyromonas_somerae	0.184156	0.198597	-0.110381
s__Coprococcus_comes	0.244264	0.134617	0.145093
s__Ruminococcus_torques	0.28866	0.213626	0.166209
s__Ruminococcus_sp_5_1_39BFAA	0.308493	0.230738	0.214964
s__Adlercreutzia_equolifaciens	0.322235	0.172672	0.193478
BMI_low_n14	ADN (rho)	CRC (rho)	CTR (rho)
s__Coprococcus_comes		0.0452556	-1
s__Peptostreptococcus_stomatis		0.683349
s__Bifidobacterium_pseudocatenulatum		-0.21625	1
s__Adlercreutzia_equolifaciens		-0.634994	-0.5
s__Parabacteroides_distasonis		-0.151515	1
BMI_normal_n243	ADN (rho)	CRC (rho)	CTR (rho)
s__Ruminococcus_champanellensis	-0.258391	-0.136831	-0.172471
s__Parabacteroides_distasonis	-0.170446	-0.265851	0.129269
s__Coprococcus_comes	0.401603	-0.0391354	0.126835
s__Ruminococcus_torques	0.446835	0.0616723	0.115377
s__Haemophilus_parainfluenzae	-0.581776	-0.250589	-0.0233164
s__Adlercreutzia_equolifaciens	0.125804	0.225803	0.0158405
BMI_overweight_n160	ADN (rho)	CRC (rho)	CTR (rho)
s__Ruminococcus_sp_5_1_39BFAA	-0.113034	0.289067	0.365543
s__Odoribacter_splanchnicus	-0.202606	-0.259372	-0.353215
s__Odoribacter_splanchnicus.1	-0.202606	-0.259372	-0.353215
s__Alistipes_indistinctus	0.0160551	-0.375408	-0.341145
s__Parabacteroides_merdae	-0.152199	-0.0572773	-0.301819
s__Parabacteroides_goldsteinii	-0.125948	-0.207395	-0.286135
s__Collinsella_aerofaciens	-0.0452549	0.245184	0.26587
s__Lachnospiraceae_bacterium_7_1_58FAA	0.00748958	-0.27204	-0.222912
s__Eubacterium_eligens	-0.136719	-0.50402	-0.210143
s__Eubacterium_hallii	0.00864293	0.288421	0.178708
s__Clostridium_hathewayi	0.269067	-0.346747	-0.176229
s__Alistipes_onderdonkii	-0.397142	-0.274326	-0.15348
s__Fusobacterium_nucleatum		-0.279115	-0.152994
s__Methanobrevibacter_smithii	-0.467921	-0.0929895	-0.150358
s__Solobacterium_moorei	0.0261798	-0.392125	-0.137926
s__Parvimonas_micra	-0.197924	-0.283321	-0.128036
s__Peptostreptococcus_anaerobius		-0.318754	0.108223
s__Peptostreptococcus_stomatis	-0.165153	-0.262128	0.10318
s__Clostridium_symbiosum	0.412416	-0.379104	-0.0796412
s__Clostridium_sp_ATCC_BAA_442		-0.263059	0.0552555
BMI_obese_n74	ADN (rho)	CRC (rho)	CTR (rho)
s__Gemella_morbillorum	-0.0151331	0.127229	-0.417194
s__Roseburia_intestinalis	0.494293	-0.0906178	0.152709
s__Clostridiales_bacterium_1_7_47FAA	-0.0692923	-0.276157	-0.356259
s__Bifidobacterium_pseudocatenulatum	0.214664	-0.043862	0.415437
s__Streptococcus_mutans	0.112897	-0.349167	-0.527043
