# Supplementary material for: Species-level identification of enterotype-specific microbial markers for colorectal cancer and adenoma
Source: Royal Society of Chemistry journal article supplement (doi:10.1039/d4mo00016a), 2024-05-09
Supplement: d4mo00016a2.pdf [file d4mo00016a2.pdf]

## Species-Level Identification of Enterotype-Specific Microbial Markers for Colorectal Cancer and Adenoma

### Supplementary Figures

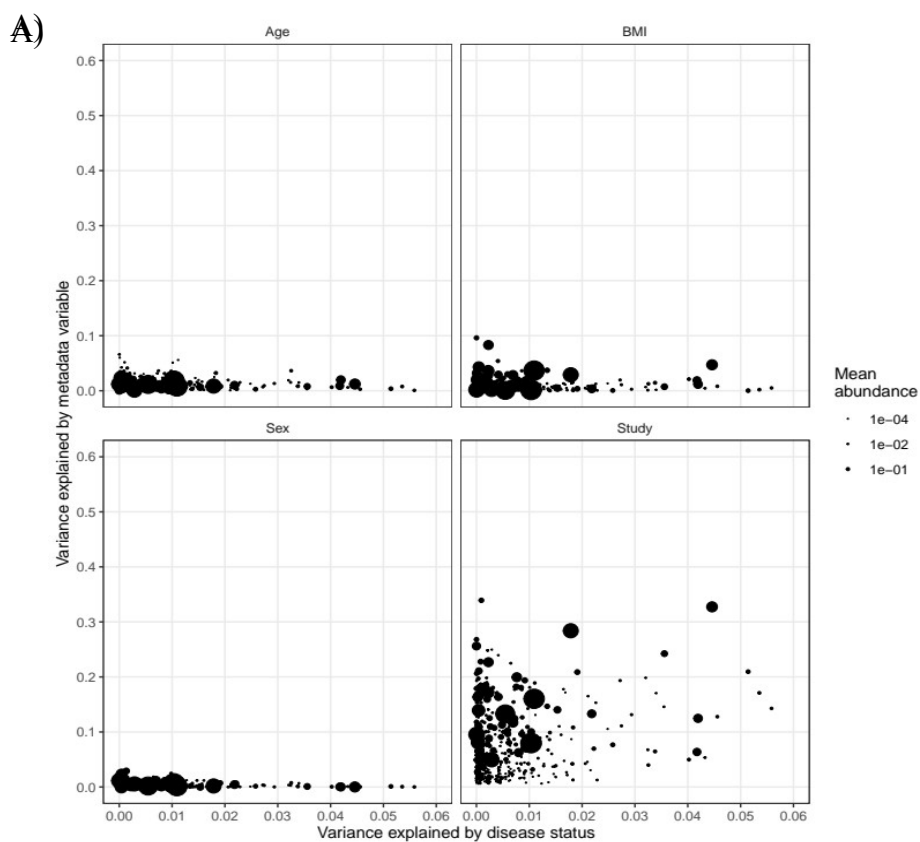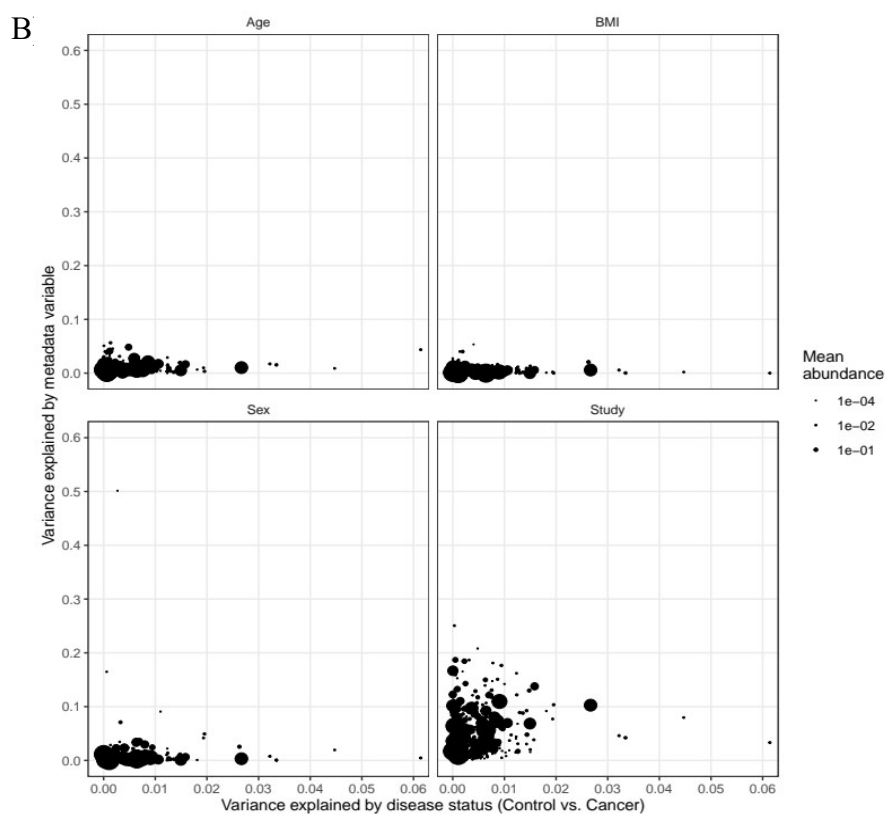

C)

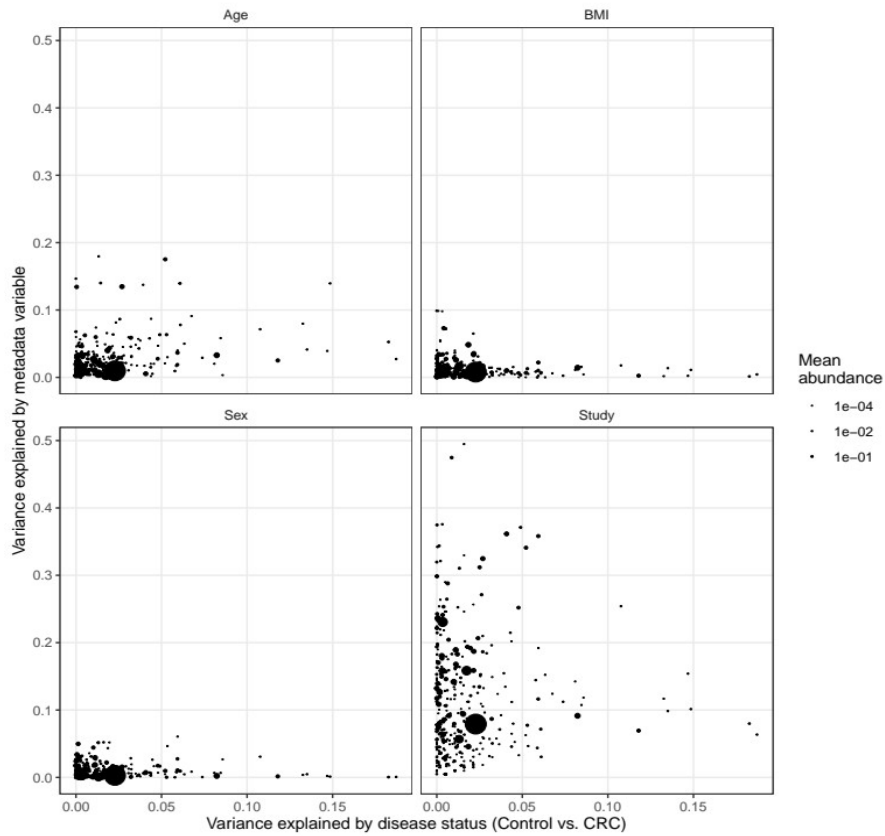

C)

Figure S1. Variance explained by disease status (Control vs. CRC) is plotted against variance explained by metadata variable for microbial species in A) Enterotype 1, B) Enterotype 2 and C) Enterotype 3

A)

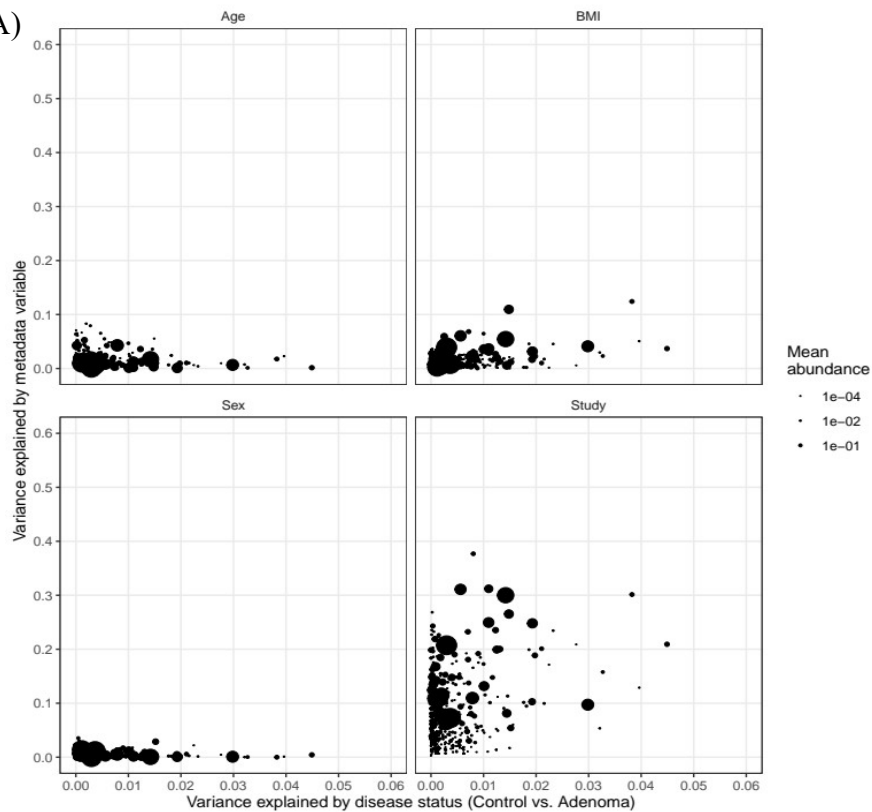

A)

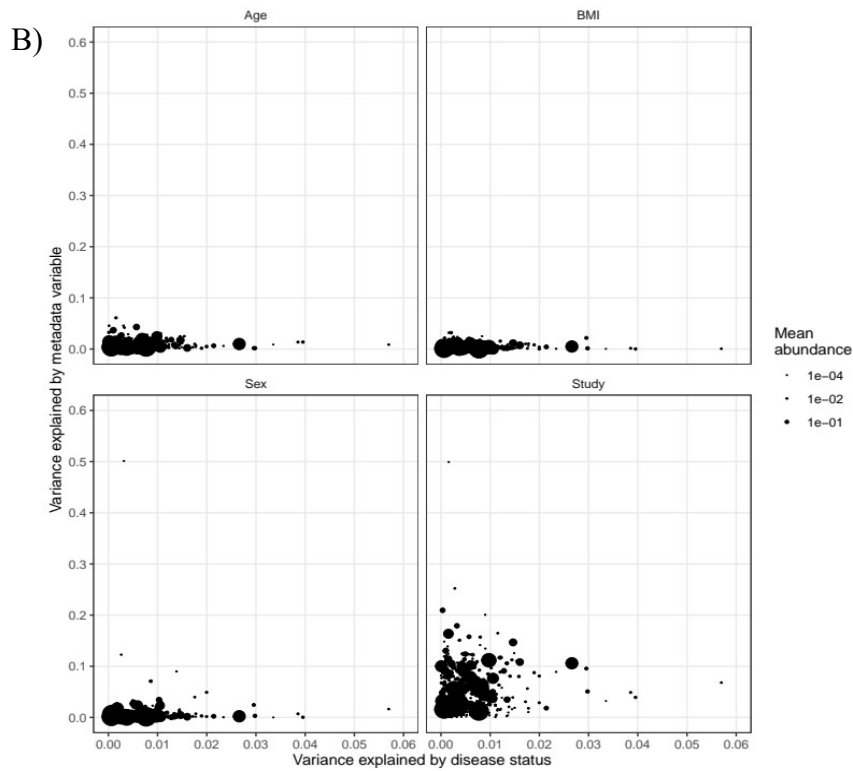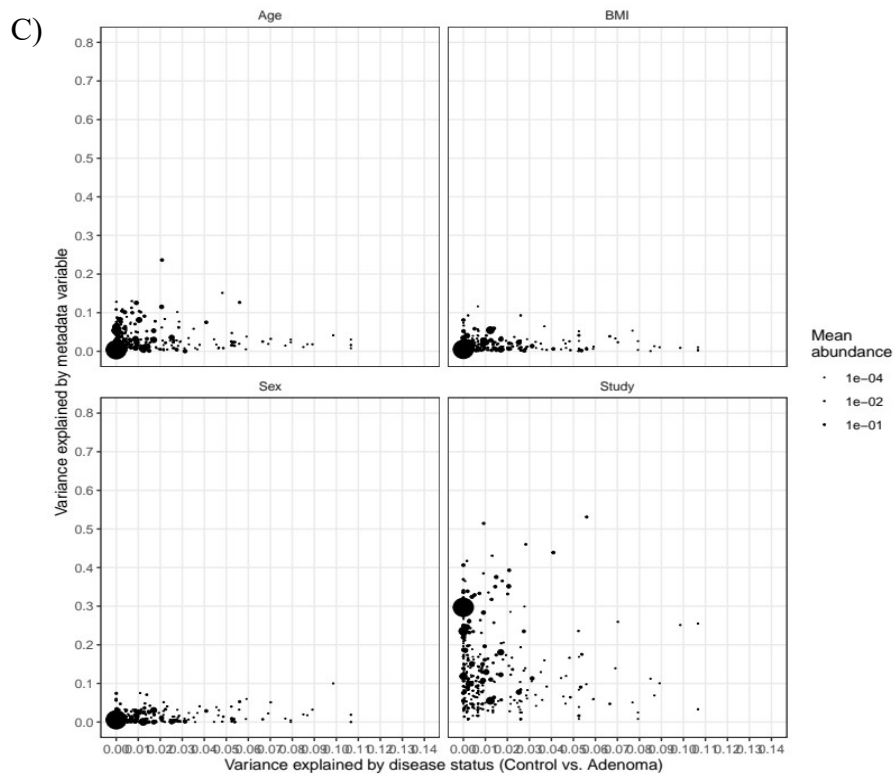

Figure S2. Variance explained by disease status (Control vs. ADN) is plotted against variance explained by metadata variable for microbial species in A) Enterotype 1, B) Enterotype 2 and C) Enterotype 3.

A)

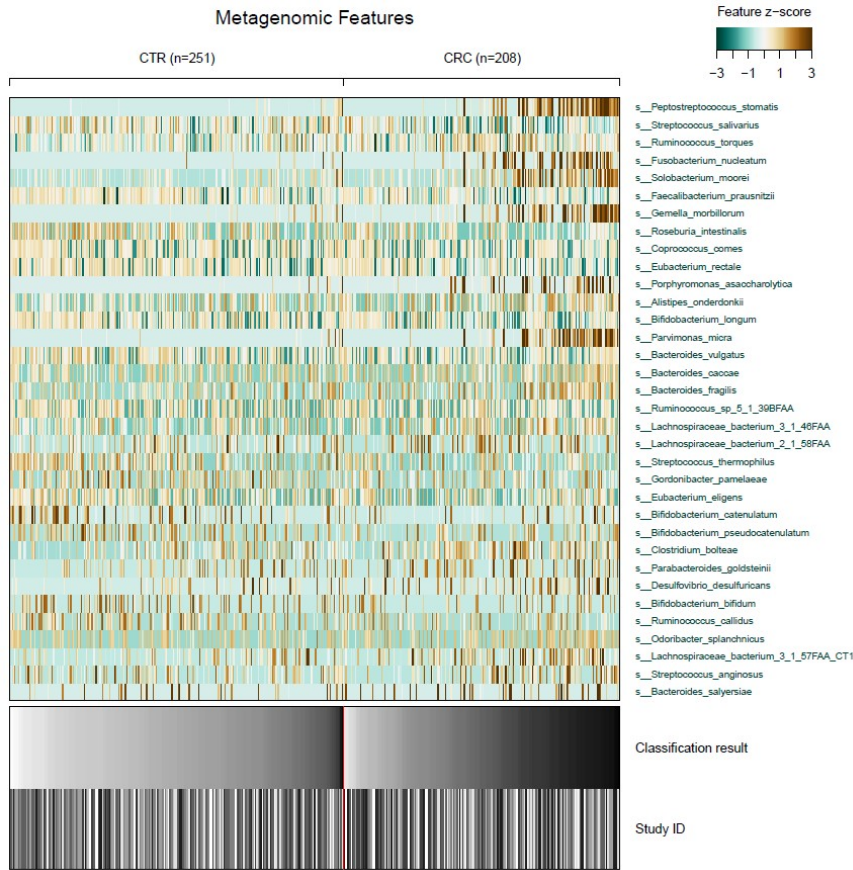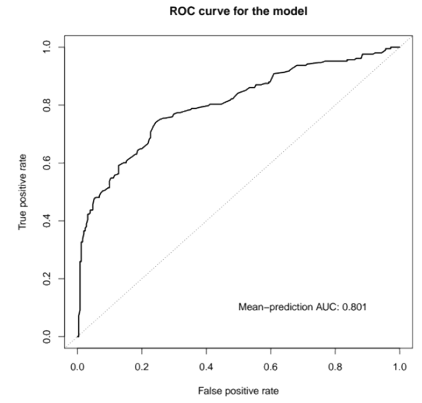

B)

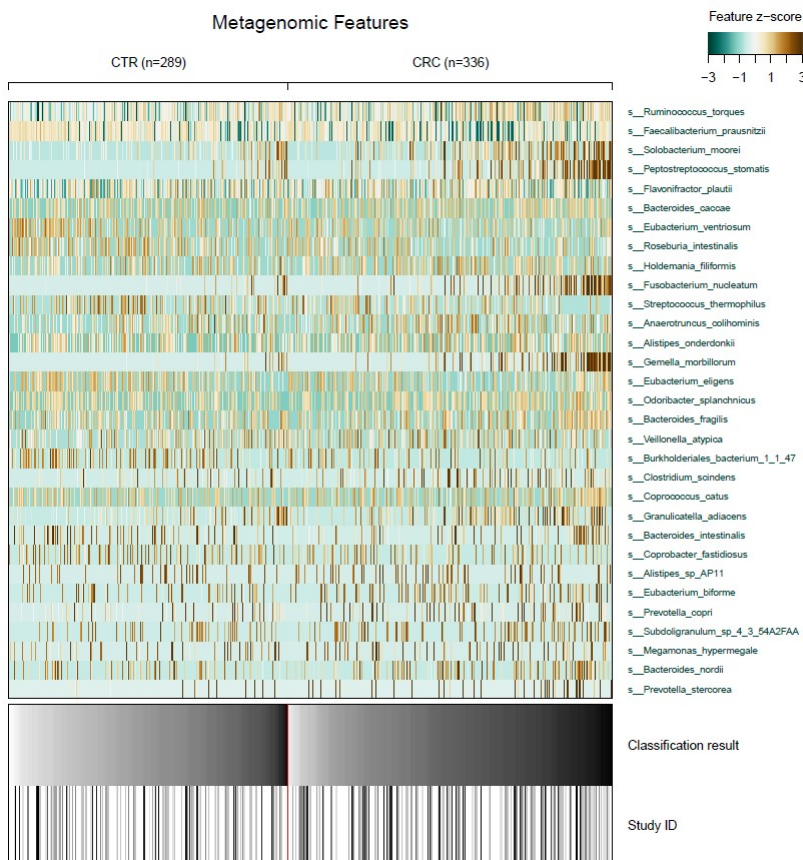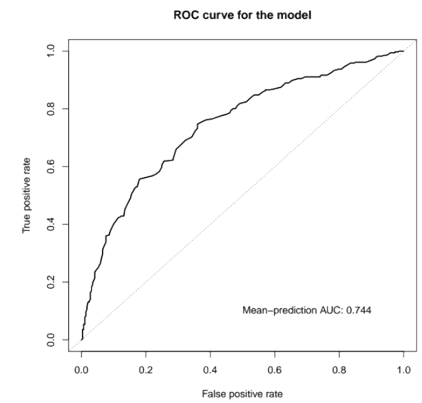

C)

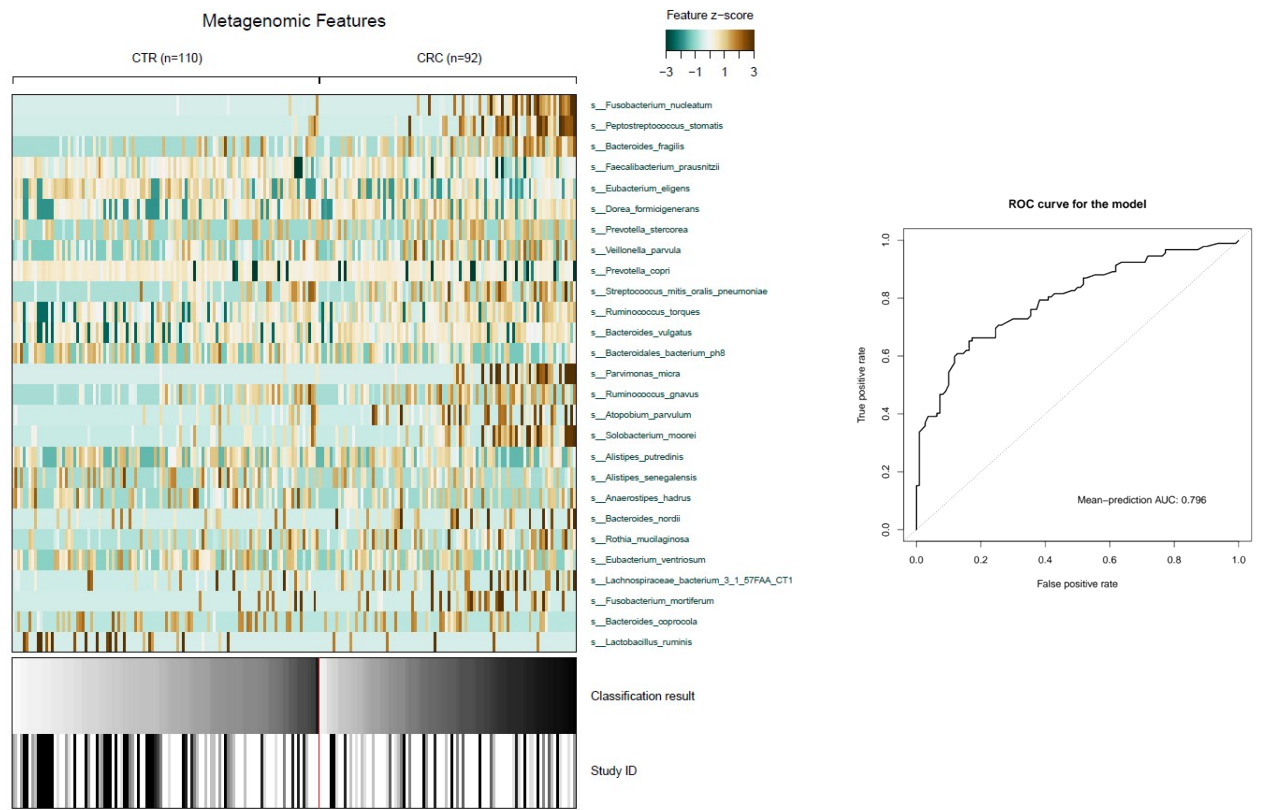

Figure S3. Random Forest Classifier results for distinguishing CRC from Controls in A) Enterotype 1, B) Enterotype 2, C) Enterotype 3.

A)

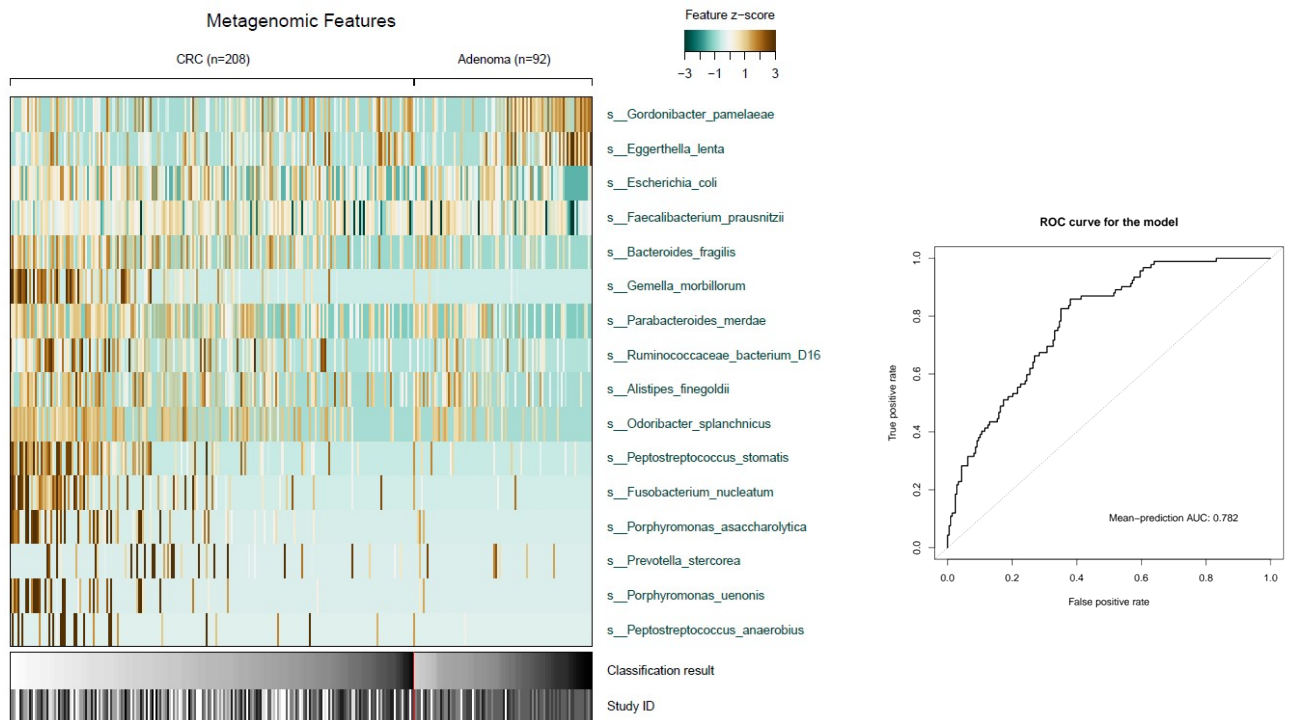

B)

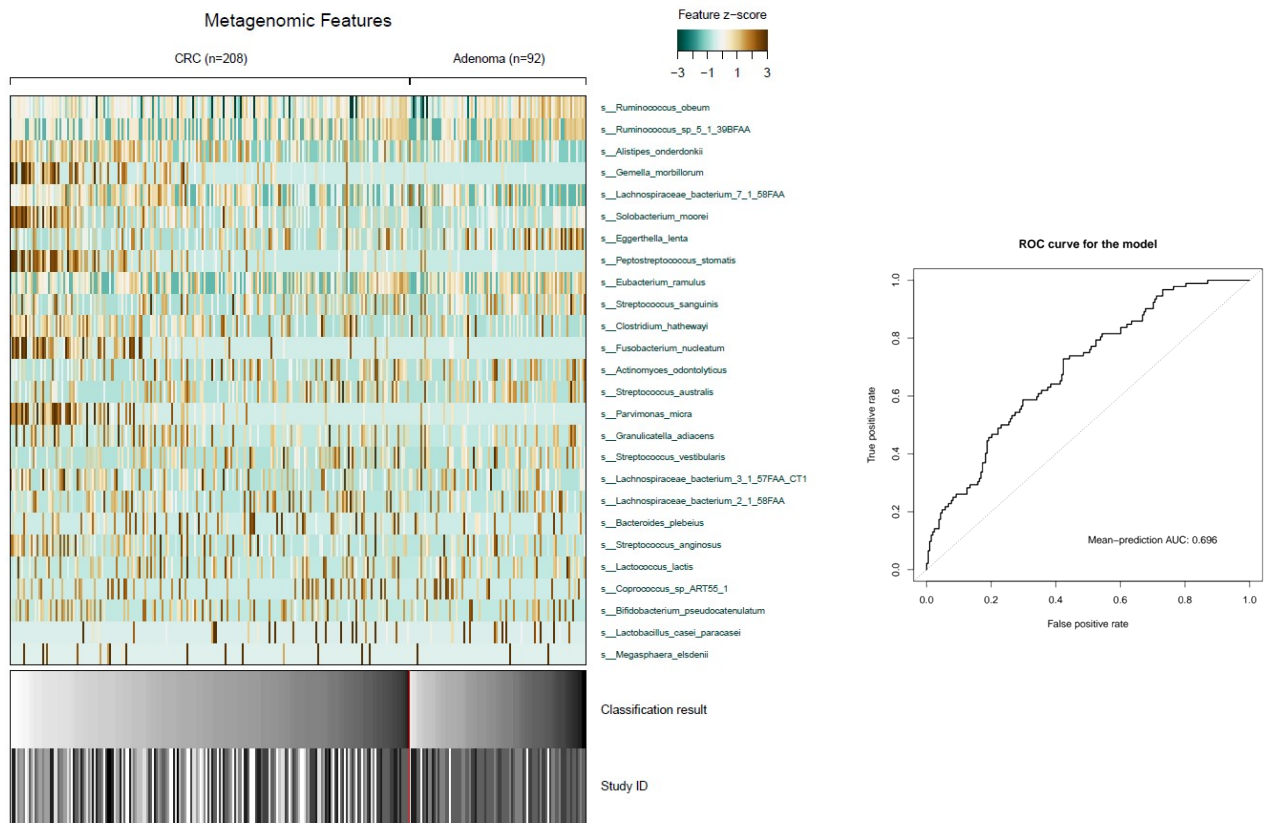

C)

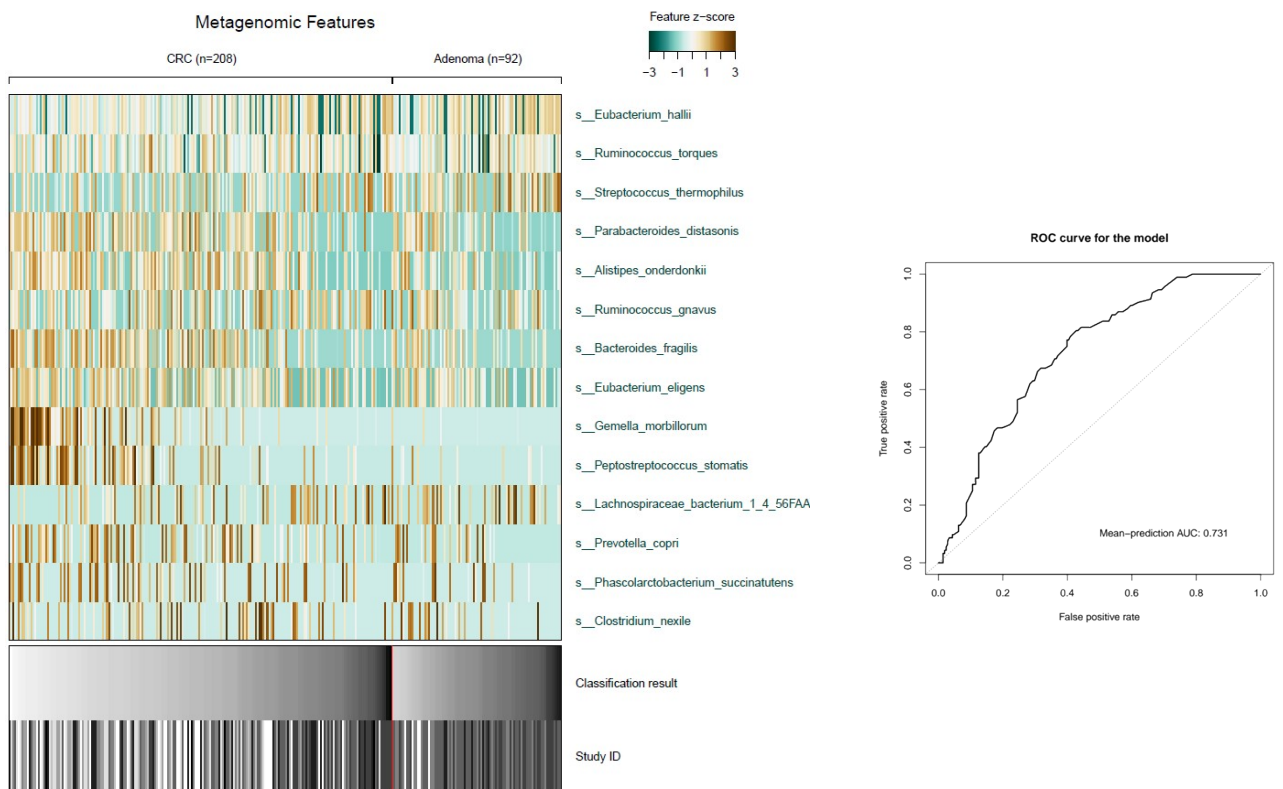

Figure S4. Random Forest Classifier results for distinguishing ADN from CRC in A) Enterotype 1, B) Enterotype 2, C) Enterotype 3.

A)

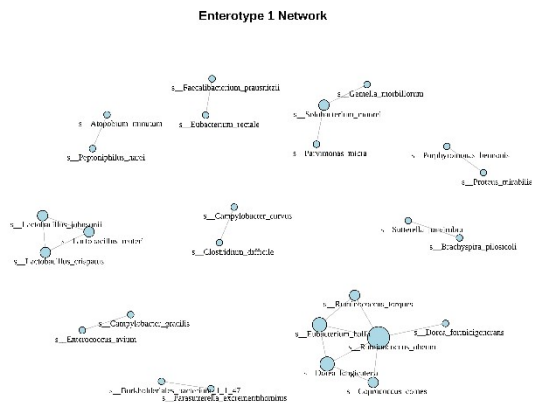

B)

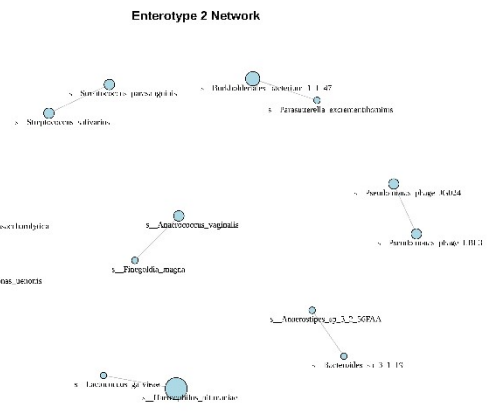

C)

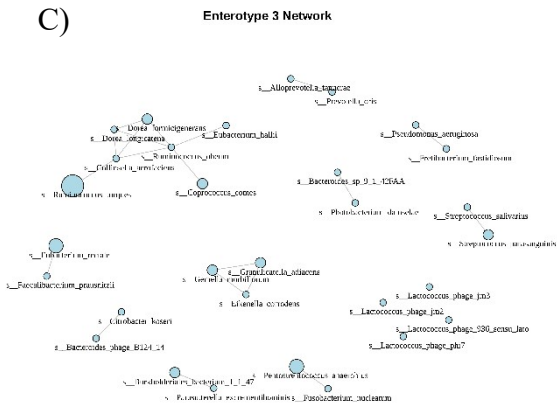

Figure S5. Microbial co-occurrence network plots of enterotype classes, A) Enterotype 1, B) Enterotype 2, C): Enterotype 3
